# Supplementary material
Source: publisher site journal article supplement (https://www.spandidos-publications.com/5198/downloadSupplementary)
Supplement: Supplementary file 2 [file downloadSupplementary]

## Sheet: Table SII
Table SII. Detailed information on NIR RASEs between FDPS-OE vs. control samples.
X.ID	Chr	Ass1	Ass2	Strand	Mss1	Mss2	Type	Isoform	KorN	Ctrl_1st.Ratio	Ctrl_1st.Alt_average_sj	Ctrl_1st.Model_average_sj	Ctrl_1st.Alt_sj	Ctrl_1st.Model_sj	Ctrl_1st.isfiltered	Ctrl_2nd.Ratio	Ctrl_2nd.Alt_average_sj	Ctrl_2nd.Model_average_sj	Ctrl_2nd.Alt_sj	Ctrl_2nd.Model_sj	Ctrl_2nd.isfiltered	FDPS_1st.Ratio	FDPS_1st.Alt_average_sj	FDPS_1st.Model_average_sj	FDPS_1st.Alt_sj	FDPS_1st.Model_sj	FDPS_1st.isfiltered	FDPS_2nd.Ratio	FDPS_2nd.Alt_average_sj	FDPS_2nd.Model_average_sj	FDPS_2nd.Alt_sj	FDPS_2nd.Model_sj	FDPS_2nd.isfiltered	Pvalue	Tvalue	DiffType	Gene	Symbol	GeneType	Description
known_NIR_66	chr1	109494154	109495143	+	109494287	109495143	A5SS	ENST00000496961.5	known	0.4	4	6	4	6	y	0.5	6	6	6	6	y	0.06	2	29	2	29	y	0	0	11	0	11	n	0.0312522	-7.20294	down	ENSG00000174151.14	CYB561D1	protein_coding	cytochrome b561 family, member D1
known_NIR_140	chr1	113614658	113619736	+	113614658;113618606	113618532;113619736	ES	ENST00000369617.8	known	0.79	35	9.5	35	8;11	y	0.82	40	9	40	6;12	y	1	22	0	22	0;0	n	0.96	46	2	46	0;4	n	0.0240904	7	up	ENSG00000081026.18	MAGI3	protein_coding	membrane associated guanylate kinase, WW and PDZ domain containing 3
known_NIR_163	chr1	11654952	11655806	+	11654952;11655699	11655328;11655806	ES	ENST00000376770.5	known	0.41	11	16	11	10;22	y	0.38	4	6.5	4	3;10	y	0.89	16	2	16	1;3	n	0.83	12	2.5	12	3;2	y	0.0155112	13.8636	up	ENSG00000132879.13	FBXO44	protein_coding	F-box protein 44
known_NIR_164	chr1	11654952;11655699	11655670;11655806	+	11654952	11655806	cassetteExon	ENST00000376768.5	known	0.5	11	11	0;22	11	n	0.56	5	4	0;10	4	n	0.14	2.5	16	2;3	16	y	0.08	1	12	0;2	12	n	0.0100505	-9.89949	down	ENSG00000132879.13	FBXO44	protein_coding	F-box protein 44
known_NIR_179	chr1	119033359	119034095	-	119033388	119034095	A3SS	ENST00000369426.9	known	0.97	131	4	131	4	y	0.96	126	5	126	5	y	0.92	153	13	153	13	y	0.91	153	15	153	15	y	0.0194193	-7.07107	down	ENSG00000116874.11	WARS2	protein_coding	tryptophanyl tRNA synthetase 2, mitochondrial
known_NIR_298	chr1	146066561	146067180	-	146066561	146093957	A5SS	ENST00000610925.4	known	0.57	280	207	280	207	y	0.56	361	289	361	289	y	0.52	275	252	275	252	y	0.53	417	364	417	364	y	0.0298575	-5.65685	down	ENSG00000271425.6	NBPF10	protein_coding	neuroblastoma breakpoint family, member 10
known_NIR_341	chr1	146970719	146971183	+	146970719	146977466	A3SS	ENST00000439206.6	known	0.92	36	3	36	3	y	0.94	49	3	49	3	y	0.72	13	5	13	5	y	0.76	28	9	28	9	y	0.0316556	-8.49706	down	ENSG00000268043.7	NBPF12	protein_coding	neuroblastoma breakpoint family, member 12
known_NIR_430	chr1	149513528	149514238	+	149513528	149518992	A3SS	ENST00000426482.3	known	0.37	234	393	234	393	y	0.36	244	435	244	435	y	0.32	247	517	247	517	y	0.33	257	520	257	520	y	0.0298575	-5.65685	down	ENSG00000271383.6	NBPF19	protein_coding	neuroblastoma breakpoint family, member 19
known_NIR_858	chr1	161176095	161176434	-	161176074	161176434	A3SS	ENST00000319769.9	known	0.36	55	98	55	98	y	0.33	56	113	56	113	y	0.48	68	75	68	75	y	0.52	109	99	109	99	y	0.0299646	6.2	up	ENSG00000158850.14	B4GALT3	protein_coding	UDP-Gal:betaGlcNAc beta 1,4- galactosyltransferase, polypeptide 3
known_NIR_868	chr1	162287436	162300633	+	162287436	162300648	A3SS	ENST00000530878.5	known	0.4	36	55	36	55	y	0.38	33	55	33	55	y	0.26	19	55	19	55	y	0.24	19	59	19	59	y	0.0100505	-9.89949	down	ENSG00000198929.12	NOS1AP	protein_coding	nitric oxide synthase 1 (neuronal) adaptor protein
known_NIR_896	chr1	16367308	16393231	+	16367308	16391375	A3SS&ES	ENST00000401088.8	known	0.57	224	172	224	172	y	0.55	266	222	266	222	y	0.48	320	353	320	353	y	0.5	314	313	314	313	y	0.0384761	-4.94975	down	ENSG00000055070.16	SZRD1	protein_coding	SUZ RNA binding domain containing 1
known_NIR_1118	chr1	205523715	205524232	+	205523625	205524232	A5SS	ENST00000429964.6	known	0.32	51	106	51	106	y	0.34	36	70	36	70	y	0.21	18	66	18	66	y	0.2	17	69	17	69	y	0.0212375	-11.1803	down	ENSG00000117266.15	CDK18	protein_coding	cyclin-dependent kinase 18
known_NIR_1551	chr1	31728277	31728598	-	31728280	31728598	A3SS	ENST00000398556.7	known	0.23	3	10	3	10	y	0.27	3	8	3	8	y	0.05	1	20	1	20	n	0	0	16	0	16	n	0.0222342	-7.02782	down	ENSG00000121753.12	ADGRB2	protein_coding	adhesion G protein-coupled receptor B2
known_NIR_1701	chr1	41151684	41160875	-	41151684;41159933	41159725;41160875	ES	ENST00000402904.6	known	0.68	33	15.5	33	11;20	y	0.69	21	9.5	21	13;6	y	0.54	26	22	26	13;31	y	0.53	28	24.5	28	6;43	y	0.00221484	-21.2132	down	ENSG00000010803.16	SCMH1	protein_coding	sex comb on midleg homolog 1 (Drosophila)
known_NIR_1755	chr1	44213527	44213709	+	44213527	44213749	A3SS	ENST00000361745.10	known	0.78	42	12	42	12	y	0.8	66	17	66	17	y	0.91	42	4	42	4	y	0.93	52	4	52	4	y	0.0116283	9.19239	up	ENSG00000178028.13	DMAP1	protein_coding	DNA methyltransferase 1 associated protein 1
known_NIR_1791	chr1	45606591	45607321	+	45606591	45613169	A3SS	ENST00000372052.8	known	0.43	423	565	423	565	y	0.46	422	489	422	489	y	0.56	641	507	641	507	y	0.53	583	519	583	519	y	0.0421737	4.71405	up	ENSG00000132780.16	NASP	protein_coding	nuclear autoantigenic sperm protein (histone-binding)
known_NIR_1845	chr1	53255185	53258319	-	53255185;53257464	53257240;53258319	ES	ENST00000306052.10	known	0.24	102	324	102	303;345	y	0.25	123	362	123	300;424	y	0.3	120	286.5	120	294;279	y	0.29	128	310.5	128	280;341	y	0.0194193	7.07107	up	ENSG00000157193.14	LRP8	protein_coding	low density lipoprotein receptor-related protein 8, apolipoprotein e receptor
known_NIR_1866	chr1	5905780	5907115	-	5905783	5907115	A3SS	ENST00000378156.8	known	0.4	16	24	16	24	y	0.38	12	20	12	20	y	0.63	26	15	26	15	y	0.66	19	10	19	10	y	0.00840801	14.1449	up	ENSG00000131697.17	NPHP4	protein_coding	nephronophthisis 4
known_NIR_2014	chr1	91720227	91721955	-	91720230	91721955	A3SS	ENST00000212355.8	known	0.13	8	53	8	53	y	0.22	15	54	15	54	y	0.51	35	34	35	34	y	0.46	16	19	16	19	y	0.0458325	6.02197	up	ENSG00000069702.10	TGFBR3	protein_coding	transforming growth factor, beta receptor III
known_NIR_2109	chr10	1056968	1072116	+	1056564	1072116	A5SS	ENST00000620998.4	known	0.74	25	9	25	9	y	0.7	7	3	7	3	y	0.5	9	9	9	9	y	0.53	9	8	9	8	y	0.0180874	-8.2	down	ENSG00000047056.14	WDR37	protein_coding	WD repeat domain 37
known_NIR_2151	chr10	113158069;113158717	113158667;113165555	+	113158069;113159992	113159920;113165555	MXE	ENST00000536810.5	known	0.72	31	12	43;19	8;16	y	0.73	51	18.5	76;26	19;18	y	0.62	46.5	28	65;28	14;42	y	0.64	59	33	74;44	21;45	y	0.0316556	-8.49706	down	ENSG00000148737.15	TCF7L2	protein_coding	transcription factor 7-like 2 (T-cell specific, HMG-box)
known_NIR_2279	chr10	16437047;16437490	16437357;16484337	+	16437047	16484337	cassetteExon	ENST00000535784.6	known	0.38	10.5	17	13;8	17	y	0.34	12.5	24	16;9	24	y	0.54	22.5	19	21;24	19	y	0.5	17	17	24;10	17	y	0.0298575	5.65685	up	ENSG00000165983.14	PTER	protein_coding	phosphotriesterase related
known_NIR_2465	chr10	45461411	45464239	-	45461411;45463996	45463151;45464239	ES	ENST00000453424.6	known	0.83	70	14.5	70	21;8	y	0.85	86	15	86	15;15	y	0.94	87	5.5	87	10;1	n	0.93	99	7	99	13;1	n	0.0316556	8.49706	up	ENSG00000165406.15	2022-03-08	protein_coding	membrane-associated ring finger (C3HC4) 8, E3 ubiquitin protein ligase
known_NIR_2548	chr10	60139087	60145968	-	60139087	60140352	5pMXE	ENST00000355288.6	known	0.08	4	44	4	44	y	0.07	2	26	2	26	y	0.13	3	20	3	20	y	0.14	1	6	1	6	n	0.0136061	8.48528	up	ENSG00000151150.20	ANK3	protein_coding	ankyrin 3, node of Ranvier (ankyrin G)
known_NIR_2715	chr10	89332627	89338661	+	89328078	89338661	A5SS	ENST00000371818.8	known	0.11	1	8	1	8	n	0.14	5	31	5	31	y	0	0	28	0	28	n	0.03	1	28	1	28	n	0.0352362	-5.18545	down	ENSG00000119917.13	IFIT3	protein_coding	interferon-induced protein with tetratricopeptide repeats 3
known_NIR_2877	chr11	118908655	118925238	-	118908655	118909914	5pMXE	ENST00000334801.7	known	0.16	52	268	52	268	y	0.14	66	422	66	422	y	0.09	54	533	54	533	y	0.07	42	538	42	538	y	0.0384761	-4.94975	down	ENSG00000186174.12	BCL9L	protein_coding	B-cell CLL/lymphoma 9-like
known_NIR_2960	chr11	125626833	125629232	+	125626833;125627830	125627607;125629232	ES	ENST00000532449.5	known	0.19	86	362.5	86	351;374	y	0.2	106	437	106	432;442	y	0.15	78	453	78	509;397	y	0.14	68	426	68	464;388	y	0.0194193	-7.07107	down	ENSG00000149554.12	CHEK1	protein_coding	checkpoint kinase 1
known_NIR_2982	chr11	128463627	128484823	-	128463627	128480191	A5SS&ES	ENST00000535549.5	known	0.16	25	129	25	129	y	0.15	26	151	26	151	y	0.11	30	238	30	238	y	0.1	29	253	29	253	y	0.0194193	-7.07107	down	ENSG00000134954.14	ETS1	protein_coding	v-ets avian erythroblastosis virus E26 oncogene homolog 1
known_NIR_3166	chr11	3371703;3373675	3373577;3379038	-	3371703	3379038	cassetteExon	ENST00000528796.5	known	0.42	34.5	48	67;2	48	y	0.35	18	34	32;4	34	y	0.68	21.5	10	43;0	10	n	0.61	33	21	58;8	21	y	0.0343842	5.25279	up	ENSG00000005801.16	ZNF195	protein_coding	zinc finger protein 195
known_NIR_3173	chr11	33722463	33722917	-	33722463	33722636	5pMXE	ENST00000445143.6	known	0.75	53	18	53	18	y	0.76	91	28	91	28	y	0.63	116	68	116	68	y	0.6	73	49	73	49	y	0.0468821	-8.85438	down	ENSG00000085063.14	CD59	protein_coding	CD59 molecule, complement regulatory protein
known_NIR_3219	chr11	36594915	36610081	+	36594592	36610081	A5SS	ENST00000334307.9	known	0.14	6	36	6	36	y	0.13	10	65	10	65	y	0	0	39	0	39	n	0.02	1	43	1	43	n	0.0212375	-11.1803	down	ENSG00000166352.15	C11orf74	protein_coding	chromosome 11 open reading frame 74
known_NIR_3240	chr11	3811424;3817535	3817353;3823883	+	3811424	3823883	cassetteExon	ENST00000396986.6	known	0.19	5	21	3;7	21	y	0.2	5.5	22	3;8	22	y	0	0	19	0;0	19	n	0.02	0.5	31	0;1	31	n	0.0119719	-16.5469	down	ENSG00000148985.19	PGAP2	protein_coding	post-GPI attachment to proteins 2
known_NIR_3279	chr11	46617890	46618260	+	46617890	46618325	A3SS	ENST00000529655.5	known	0.95	38	2	38	2	y	0.91	52	5	52	5	y	0.75	44	15	44	15	y	0.79	49	13	49	13	y	0.0298575	-5.65685	down	ENSG00000175224.16	ATG13	protein_coding	autophagy related 13
known_NIR_3323	chr11	47478940	47482695	-	47478952	47482695	A3SS	ENST00000395290.6	known	0.18	75	345	75	345	y	0.17	81	390	81	390	y	0.25	129	396	129	396	y	0.24	116	376	116	376	y	0.0100505	9.89949	up	ENSG00000149187.17	CELF1	protein_coding	CUGBP, Elav-like family member 1
known_NIR_3642	chr11	65640021	65640831	+	65638182	65640831	A5SS	ENST00000534313.5	known	0.2	16	63	16	63	y	0.22	16	56	16	56	y	0.03	2	63	2	63	y	0.02	2	83	2	83	y	0.0119719	-16.5469	down	ENSG00000213445.8	SIPA1	protein_coding	signal-induced proliferation-associated 1
known_NIR_3821	chr11	69641511	69643031	+	69641511	69647994	A3SS	ENST00000536559.1	known	0.97	345	10	345	10	y	0.98	395	9	395	9	y	0.93	466	35	466	35	y	0.94	431	27	431	27	y	0.0298575	-5.65685	down	ENSG00000110092.3	CCND1	protein_coding	cyclin D1
known_NIR_3869	chr11	72608751;72631139	72631078;72642254	-	72608751	72642254	cassetteExon	ENST00000334456.9	known	0.73	52	19	83;21	19	y	0.72	84.5	33	117;52	33	y	0.94	98.5	6	136;61	6	y	0.91	124.5	13	156;93	13	y	0.0304464	12.6491	up	ENSG00000186642.15	PDE2A	protein_coding	phosphodiesterase 2A, cGMP-stimulated
known_NIR_3931	chr11	75477795;75479488	75479244;75490237	-	75477795	75490237	cassetteExon	ENST00000533784.5	known	0.69	45	20	59;31	20	y	0.71	36	15	42;30	15	y	0.89	50	6	55;45	6	y	0.87	33	5	34;32	5	y	0.00611627	12.7279	up	ENSG00000158555.14	GDPD5	protein_coding	glycerophosphodiester phosphodiesterase domain containing 5
known_NIR_3985	chr11	82914851	82931732	+	82914851;82928938	82928777;82931732	ES	ENST00000524921.5	known	0.08	3	35	3	55;15	y	0.06	2	33.5	2	52;15	y	0.21	16	59.5	16	75;44	y	0.22	12	42	12	69;15	y	0.0170999	12.9692	up	ENSG00000165490.12	DDIAS	protein_coding	DNA damage-induced apoptosis suppressor
known_NIR_4019	chr11	844186	850288	+	844186;847300	847201;850288	ES	ENST00000397406.5	known	0	0	118	0	50;186	n	0.02	4	157	4	79;235	y	0.09	13	138	13	54;222	y	0.08	11	120.5	11	49;192	y	0.0445338	6.7082	up	ENSG00000214063.10	TSPAN4	protein_coding	tetraspanin 4
known_NIR_4060	chr11	884169	899340	-	884169;893519	893427;899340	ES	ENST00000454838.6	known	0.14	26	166	26	133;199	y	0.13	24	160.5	24	139;182	y	0.18	56	255.5	56	195;316	y	0.19	44	184.5	44	160;209	y	0.0194193	7.07107	up	ENSG00000177830.17	CHID1	protein_coding	chitinase domain containing 1
known_NIR_4109	chr12	100157256	100157528	-	100157445	100157528	A3SS	ENST00000304813.13	known	0.58	11	8	11	8	y	0.6	6	4	6	4	y	0.27	3	8	3	8	y	0.33	6	12	6	12	y	0.0449378	-9.17061	down	ENSG00000238105.7	GOLGA2P5	transcribed_unprocessed_pseudogene	golgin A2 pseudogene 5
known_NIR_4211	chr12	109259108	109260065	+	109259108	109260480	A3SS	ENST00000338432.11	known	0.17	5	25	5	25	y	0.19	6	25	6	25	y	0.41	18	26	18	26	y	0.36	12	21	12	21	y	0.0480761	7.61351	up	ENSG00000076555.15	ACACB	protein_coding	acetyl-CoA carboxylase beta
known_NIR_4219	chr12	109579946	109586022	+	109579946;109581550	109581395;109586022	ES	ENST00000228510.7	known	0.08	15	176	15	139;213	y	0.1	17	154.5	17	119;190	y	0.23	38	126.5	38	146;107	y	0.2	27	109	27	107;111	y	0.0286201	6.93375	up	ENSG00000110921.11	MVK	protein_coding	mevalonate kinase
known_NIR_4238	chr12	110163065	110180422	+	110163065	110167871	3pMXE	ENST00000361948.8	known	0.73	62	23	62	23	y	0.71	72	29	72	29	y	0.81	71	17	71	17	y	0.82	77	17	77	17	y	0.0316556	8.49706	up	ENSG00000122970.15	IFT81	protein_coding	intraflagellar transport 81
known_NIR_4285	chr12	113332960	113334993	-	113332960;113334838	113334443;113334993	ES	ENST00000552014.5	known	0.01	2	139.5	2	268;11	y	0	0	189	0	378;0	n	0.08	16	191.5	16	356;27	y	0.1	24	211	24	411;11	y	0.037184	7.60263	up	ENSG00000089060.11	SLC8B1	protein_coding	solute carrier family 8 (sodium/lithium/calcium exchanger), member B1
known_NIR_4337	chr12	121400218	121417861	+	121400218	121416159	A3SS&ES	ENST00000361234.9	known	0.01	1	102	1	102	n	0	0	149	0	149	n	0.06	10	166	10	166	y	0.07	13	172	13	172	y	0.0136061	8.48528	up	ENSG00000170633.16	RNF34	protein_coding	ring finger protein 34, E3 ubiquitin protein ligase
known_NIR_4445	chr12	131845449	131849939	+	131845449	131849802	A3SS	ENST00000360564.5	known	0.51	58	56	58	56	y	0.48	62	68	62	68	y	0.34	50	97	50	97	y	0.33	44	89	44	89	y	0.0398973	-10.1193	down	ENSG00000198598.6	MMP17	protein_coding	matrix metallopeptidase 17 (membrane-inserted)
known_NIR_4591	chr12	38318458	38323913	+	38318458	38320161	A3SS	ENST00000308742.8	known	0.13	5	34	5	34	y	0.14	14	89	14	89	y	0.19	21	89	21	89	y	0.18	21	97	21	97	y	0.0194193	7.07107	up	ENSG00000175548.8	ALG10B	protein_coding	ALG10B, alpha-1,2-glucosyltransferase
known_NIR_4628	chr12	45961322	45961700	-	45956192	45961700	A3SS	ENST00000395454.6	known	0.83	20	4	20	4	y	0.85	50	9	50	9	y	0.97	57	2	57	2	y	1	55	0	55	0	n	0.0222268	8.04315	up	ENSG00000139218.17	SCAF11	protein_coding	SR-related CTD-associated factor 11
known_NIR_4803	chr12	53314441	53315094	-	53314441;53314849	53314751;53315094	ES	ENST00000209873.8	known	0.19	51	224	51	188;260	y	0.2	50	195.5	50	160;231	y	0.13	40	272.5	40	247;298	y	0.14	44	272.5	44	262;283	y	0.0136061	-8.48528	down	ENSG00000094914.12	AAAS	protein_coding	achalasia, adrenocortical insufficiency, alacrimia
known_NIR_4996	chr12	57604858;57605731	57605571;57606190	+	57604858	57606190	cassetteExon	ENST00000548804.5	known	1	18.5	0	3;34	0	n	0.96	25	1	23;27	1	n	0.53	9	8	1;17	8	n	0.58	9.5	7	3;16	7	y	0.00673577	-13.2748	down	ENSG00000178498.15	DTX3	protein_coding	deltex 3, E3 ubiquitin ligase
known_NIR_5121	chr12	68611043;68654252	68654112;68656306	+	68611043;68652051	68648699;68656306	MXE	ENST00000542145.5	known	0.79	357	97	0;714	194;0	n	0.8	470.5	117.5	3;938	209;26	y	0.75	502.5	170.5	7;998	316;25	y	0.76	571	180	0;1142	324;36	n	0.0298575	-5.65685	down	ENSG00000127314.17	RAP1B	protein_coding	RAP1B, member of RAS oncogene family
known_NIR_5538	chr13	75760831	75760932	+	75727098	75760932	A5SS	ENST00000563635.5	known	0.19	31	135	31	135	y	0.21	47	174	47	174	y	0.29	63	158	63	158	y	0.27	44	121	44	121	y	0.0298575	5.65685	up	ENSG00000261553.5	RP11-29G8.3	processed_transcript		--
known_NIR_5623	chr14	103679518	103700655	+	103679518	103684986	3pMXE	ENST00000380038.7	known	0.53	109	96	109	96	y	0.46	107	124	107	124	y	0.24	61	189	61	189	y	0.3	65	155	65	155	y	0.0413583	-4.88094	down	ENSG00000126214.20	KLC1	protein_coding	kinesin light chain 1
known_NIR_5634	chr14	103679545	103687081	+	103679518	103687081	A5SS	ENST00000347839.10	known	0.63	77	46	77	46	y	0.67	92	46	92	46	y	0.42	49	67	49	67	y	0.47	82	93	82	93	y	0.0264129	-6.40312	down	ENSG00000126214.20	KLC1	protein_coding	kinesin light chain 1
known_NIR_5683	chr14	19333813	19333934	-	19333813	19337580	A5SS	ENST00000614614.4	known	0.88	217	30	217	30	y	0.89	294	35	294	35	y	0.92	301	27	301	27	y	0.93	252	20	252	20	y	0.0298575	5.65685	up	ENSG00000244306.9	LINC01296	transcribed_processed_pseudogene	long intergenic non-protein coding RNA 1296
known_NIR_5908	chr14	54776540;54784447	54784340;54784537	+	54776540	54784537	cassetteExon	ENST00000554335.5	known	0.18	21	93	19;23	93	y	0.16	17.5	89	14;21	89	y	0.09	15	143	21;9	143	y	0.11	13.5	112	18;9	112	y	0.0384761	-4.94975	down	ENSG00000020577.13	SAMD4A	protein_coding	sterile alpha motif domain containing 4A
known_NIR_6091	chr14	73852120	73858816	+	73852004	73858816	A5SS	ENST00000555228.5	known	0.6	29	19	29	19	y	0.57	21	16	21	16	y	0.83	19	4	19	4	y	0.79	27	7	27	7	y	0.0152674	9	up	ENSG00000140043.11	PTGR2	protein_coding	prostaglandin reductase 2
known_NIR_6268	chr15	22786834	22810749	+	22786248	22810749	A5SS	ENST00000561183.5	known	1	117	0	117	0	n	0.99	167	2	167	2	y	0.96	149	7	149	7	y	0.95	139	8	139	8	y	0.0298575	-5.65685	down	ENSG00000170113.15	NIPA1	protein_coding	non imprinted in Prader-Willi/Angelman syndrome 1
known_NIR_6333	chr15	40554127	40557216	-	40528790	40557216	A3SS	ENST00000560305.5	known	0.92	59	5	59	5	y	0.91	80	8	80	8	y	1	66	0	66	0	n	0.98	84	2	84	2	y	0.0445338	6.7082	up	ENSG00000128891.15	C15orf57	protein_coding	chromosome 15 open reading frame 57
known_NIR_6345	chr15	40776401	40776542	-	40776292	40776542	A3SS	ENST00000220496.8	known	0.1	6	53	6	53	y	0.12	9	63	9	63	y	0.03	2	73	2	73	y	0.05	5	103	5	103	y	0.0384761	-4.94975	down	ENSG00000104129.9	DNAJC17	protein_coding	DnaJ (Hsp40) homolog, subfamily C, member 17
known_NIR_6468	chr15	49615243	49620134	-	49615243	49620631	A5SS	ENST00000561064.5	known	0.69	9	4	9	4	y	0.76	13	4	13	4	y	0	0	9	0	9	n	0.12	2	15	2	15	y	0.0207466	-9.57355	down	ENSG00000166262.15	FAM227B	protein_coding	family with sequence similarity 227, member B
known_NIR_6471	chr15	49621122;49623798	49623671;49625113	+	49621122	49625113	cassetteExon	ENST00000403028.7	known	0.03	4.5	131	2;7	131	y	0.04	7.5	195	5;10	195	y	0.08	16.5	194	10;23	194	y	0.09	12.5	134	3;22	134	y	0.0194193	7.07107	up	ENSG00000104047.14	DTWD1	protein_coding	DTW domain containing 1
known_NIR_6481	chr15	50439177	50449400	+	50439177;50441493	50441349;50449400	ES	ENST00000307179.8	known	0.08	12	132.5	12	155;110	y	0.09	15	143	15	152;134	y	0.02	3	122.5	3	138;107	y	0	0	167	0	178;156	n	0.0445338	-6.7082	down	ENSG00000138592.13	USP8	protein_coding	ubiquitin specific peptidase 8
known_NIR_6488	chr15	52336556;52337884	52337810;52340196	-	52336556	52340196	cassetteExon	ENST00000399231.7	known	0.08	9	103	7;11	103	y	0.06	5.5	90	6;5	90	y	0.18	26	121	27;25	121	y	0.15	20	111	22;18	111	y	0.0454248	5.26965	up	ENSG00000197535.14	MYO5A	protein_coding	myosin VA (heavy chain 12, myoxin)
known_NIR_6489	chr15	52340394	52346361	-	52340394;52343197	52343117;52346361	ES	ENST00000399231.7	known	0.4	47	71	47	72;70	y	0.44	55	70.5	55	82;59	y	0.61	59	38	59	42;34	y	0.56	78	61.5	78	61;62	y	0.0392905	5.15373	up	ENSG00000197535.14	MYO5A	protein_coding	myosin VA (heavy chain 12, myoxin)
known_NIR_6598	chr15	65512564	65517486	-	65512564	65515656	5pMXE	ENST00000341861.9	known	0.6	50	34	50	34	y	0.62	76	46	76	46	y	0.74	68	24	68	24	y	0.73	57	21	57	21	y	0.0212375	11.1803	up	ENSG00000074603.18	DPP8	protein_coding	dipeptidyl-peptidase 8
known_NIR_6729	chr15	74890089	74890438	+	74890089	74890527	A3SS	ENST00000352410.8	known	0.12	11	83	11	83	y	0.1	9	80	9	80	y	0	0	76	0	76	n	0.02	2	87	2	87	y	0.0194193	-7.07107	down	ENSG00000178802.17	MPI	protein_coding	mannose phosphate isomerase
known_NIR_6792	chr15	78264895	78265481	+	78264895	78270497	A3SS	ENST00000394855.7	known	0.17	7	34	7	34	y	0.15	5	29	5	29	y	0.38	46	74	46	74	y	0.37	37	63	37	63	y	0.00960498	19.2302	up	ENSG00000140403.12	DNAJA4	protein_coding	DnaJ (Hsp40) homolog, subfamily A, member 4
known_NIR_6853	chr15	84604333	84606529	+	84604333	84620602	A3SS	ENST00000448803.6	known	0.21	3	11	3	11	y	0.18	3	14	3	14	y	0.71	17	7	17	7	y	0.75	15	5	15	5	y	0.0031022	21.4	up	ENSG00000176371.13	ZSCAN2	protein_coding	zinc finger and SCAN domain containing 2
known_NIR_7280	chr16	30064505	30066885	+	30065927	30066885	5pMXE	ENST00000564595.6	known	0.18	15	70	15	70	y	0.17	18	90	18	90	y	0.11	7	56	7	56	y	0.09	7	69	7	69	y	0.0445338	-6.7082	down	ENSG00000149925.16	ALDOA	protein_coding	aldolase A, fructose-bisphosphate
known_NIR_7282	chr16	30064505;30065927	30065876;30066885	+	30064505	30066885	cassetteExon	ENST00000395248.5	known	0.74	42	15	14;70	15	y	0.75	54	18	18;90	18	y	0.85	39.5	7	23;56	7	y	0.87	48.5	7	28;69	7	y	0.0239816	10.2859	up	ENSG00000149925.16	ALDOA	protein_coding	aldolase A, fructose-bisphosphate
known_NIR_7345	chr16	3065710	3065781	+	3065710	3065784	A3SS	ENST00000444393.7	known	0.18	36	164	36	164	y	0.2	49	201	49	201	y	0.11	21	169	21	169	y	0.09	24	252	24	252	y	0.0238129	-6.36396	down	ENSG00000008517.16	IL32	protein_coding	interleukin 32
known_NIR_7784	chr16	727614	728116	+	727614;728029	727965;728116	ES	ENST00000549114.5	known	0.03	2	67.5	2	84;51	y	0	0	63	0	73;53	n	0.11	5	42	5	52;32	y	0.14	7	41.5	7	57;26	y	0.0352362	5.18545	up	ENSG00000103253.17	HAGHL	protein_coding	hydroxyacylglutathione hydrolase-like
known_NIR_7863	chr16	84854829	84866900	+	84854829	84866897	A3SS	ENST00000262424.9	known	0.03	3	111	3	111	y	0.04	4	98	4	98	y	0.09	14	141	14	141	y	0.08	10	121	10	121	y	0.0194193	7.07107	up	ENSG00000103196.11	CRISPLD2	protein_coding	cysteine-rich secretory protein LCCL domain containing 2
known_NIR_7866	chr16	85613398	85648552	+	85613398;85634132	85633914;85648552	ES	ENST00000253458.11	known	0.47	36	40	36	37;43	y	0.45	39	47.5	39	47;48	y	0.36	21	37.5	21	19;56	y	0.33	30	61	30	68;54	y	0.0329611	-6.37905	down	ENSG00000131149.17	GSE1	protein_coding	Gse1 coiled-coil protein
known_NIR_8060	chr17	16463247	16470302	+	16463317	16470302	A5SS	ENST00000581361.5	known	0.45	10	12	10	12	y	0.53	27	24	27	24	y	0.88	15	2	15	2	y	0.82	32	7	32	7	y	0.0228956	7.2	up	ENSG00000175061.17	LRRC75A-AS1	processed_transcript	LRRC75A antisense RNA 1
known_NIR_8075	chr17	17820521	17836727	-	17820521;17823607	17823518;17836727	ES	ENST00000355815.8	known	0.61	194	125.5	194	251;0	n	0.62	206	128.5	206	237;20	y	0.73	180	68	180	130;6	y	0.75	164	56	164	112;0	n	0.0212375	11.1803	up	ENSG00000072310.16	SREBF1	protein_coding	sterol regulatory element binding transcription factor 1
known_NIR_8132	chr17	19378542	19378896	+	19378101	19378896	A5SS	ENST00000308406.9	known	0.84	31	6	31	6	y	0.79	34	9	34	9	y	0.4	21	32	21	32	y	0.31	28	61	28	61	y	0.0250478	-8.93583	down	ENSG00000166484.19	MAPK7	protein_coding	mitogen-activated protein kinase 7
known_NIR_8150	chr17	20232414	20236860	+	20232405	20236860	A5SS	ENST00000395529.7	known	0.1	9	83	9	83	y	0.07	10	137	10	137	y	0.22	26	92	26	92	y	0.19	27	112	27	112	y	0.0298575	5.65685	up	ENSG00000128487.16	SPECC1	protein_coding	sperm antigen with calponin homology and coiled-coil domains 1
known_NIR_8251	chr17	35107447	35119111	-	35107447;35118619	35118501;35119111	ES	ENST00000345365.10	known	0.48	12	13	12	8;18	y	0.46	25	29	25	29;29	y	0.68	26	12.5	26	6;19	y	0.71	20	8	20	3;13	y	0.0104404	12.4808	up	ENSG00000185379.20	RAD51D	protein_coding	RAD51 paralog D
known_NIR_8304	chr17	38137003	38137985	+	38013061	38137985	A5SS	ENST00000618737.2	known	0.55	11	9	11	9	y	0.62	15	9	15	9	y	0.82	14	3	14	3	y	0.9	43	5	43	5	y	0.0366988	5.17396	up	ENSG00000274419.4	TBC1D3D	protein_coding	TBC1 domain family, member 3D
known_NIR_8305	chr17	38318735;38320767	38320618;38322126	+	38318735	38322126	cassetteExon	ENST00000619548.1	known	0.99	225	3	206;244	3	y	1	284	0	275;293	0	n	0.95	263.5	14	240;287	14	y	0.96	265	12	239;291	12	y	0.0298575	-5.65685	down	ENSG00000278845.4	MRPL45	protein_coding	mitochondrial ribosomal protein L45
known_NIR_8341	chr17	39745788	39746109	+	39745788;39746000	39745913;39746109	ES	ENST00000309156.8	known	0.29	27	66.5	27	76;57	y	0.28	40	101.5	40	110;93	y	0.53	78	70	78	89;51	y	0.56	59	46	59	49;43	y	0.0221384	16.4438	up	ENSG00000141738.13	GRB7	protein_coding	growth factor receptor-bound protein 7
known_NIR_8476	chr17	44218296	44219445	-	44218296	44220740	A5SS	ENST00000343638.9	known	0.48	38	41	38	41	y	0.44	28	35	28	35	y	0.67	39	19	39	19	y	0.66	59	31	59	31	y	0.0493021	9.94396	up	ENSG00000108312.14	UBTF	protein_coding	upstream binding transcription factor, RNA polymerase I
known_NIR_8519	chr17	45987095	45991460	+	45987095;45990075	45989878;45991460	ES	ENST00000262410.9	known	0.67	28	14	28	10;18	y	0.66	19	10	19	9;11	y	0.57	20	15	20	16;14	y	0.56	34	26.5	34	32;21	y	0.00496281	-14.1421	down	ENSG00000186868.15	MAPT	protein_coding	microtubule-associated protein tau
known_NIR_8526	chr17	46297742	46299794	+	46294029	46299794	A5SS	ENST00000496930.5	known	0.5	9	9	9	9	y	0.53	8	7	8	7	y	1	1	0	1	0	n	0.93	13	1	13	1	n	0.0248122	11.8176	up	ENSG00000176681.14	LRRC37A	protein_coding	leucine rich repeat containing 37A
known_NIR_8544	chr17	47056753	47072472	-	47056753	47067414	5pMXE	ENST00000575930.5	known	0.18	6	27	6	27	y	0.13	5	33	5	33	y	0.38	8	13	8	13	y	0.34	16	31	16	31	y	0.0264129	6.40312	up	ENSG00000262879.5	RP11-156P1.3	processed_transcript		--
known_NIR_8545	chr17	47082350	47099835	-	47072559	47099835	A3SS	ENST00000573341.5	known	1	2	0	2	0	n	0.86	19	3	19	3	y	0.33	3	6	3	6	n	0.25	1	3	1	3	n	0.0288101	-7.93822	down	ENSG00000262879.5	RP11-156P1.3	processed_transcript		--
known_NIR_8717	chr17	60887211	60889695	+	60874738	60889695	A5SS	ENST00000589222.5	known	0.15	9	52	9	52	y	0.08	2	22	2	22	y	0.38	17	28	17	28	y	0.43	12	16	12	16	y	0.0273792	6.74236	up	ENSG00000141376.20	BCAS3	protein_coding	breast carcinoma amplified sequence 3
known_NIR_8761	chr17	6449407;6449778	6449704;6450028	+	6449407	6450028	cassetteExon	ENST00000572447.5	known	0.06	6.5	99	5;8	99	y	0.05	4	82	8;0	82	n	0.02	2	119	4;0	119	n	0.01	0.5	67	1;0	67	n	0.0298575	-5.65685	down	ENSG00000129195.15	FAM64A	protein_coding	family with sequence similarity 64, member A
known_NIR_8766	chr17	64805100;64815245	64814863;64821767	-	64805100	64821767	cassetteExon	ENST00000578036.5	known	1	16.5	0	15;18	0	n	0.84	21	4	22;20	4	y	0.3	13	31	16;10	31	y	0.19	11	47	7;15	47	y	0.0273007	-6.95285	down	ENSG00000214176.9	PLEKHM1P	transcribed_unprocessed_pseudogene	pleckstrin homology domain containing, family M (with RUN domain) member 1 pseudogene
known_NIR_9056	chr17	78485162	78489375	+	78485090	78489375	A5SS	ENST00000588565.5	known	0.73	36	13	36	13	y	0.71	44	18	44	18	y	0.9	26	3	26	3	y	0.89	40	5	40	5	y	0.012987	15.6525	up	ENSG00000267432.5	DNAH17-AS1	processed_transcript	DNAH17 antisense RNA 1
known_NIR_9073	chr17	7907488	7907894	+	7907488;7907702	7907601;7907894	ES	ENST00000380358.8	known	0.6	253	171	253	248;94	y	0.59	279	196	279	268;124	y	0.68	358	165.5	358	217;114	y	0.66	292	148	292	207;89	y	0.0445338	6.7082	up	ENSG00000170004.16	CHD3	protein_coding	chromodomain helicase DNA binding protein 3
known_NIR_9155	chr17	81892106	81893552	+	81891841	81893552	A5SS	ENST00000612413.4	known	0.53	84	76	84	76	y	0.5	81	82	81	82	y	0.37	53	90	53	90	y	0.39	64	100	64	100	y	0.025109	-7.48845	down	ENSG00000141552.17	ANAPC11	protein_coding	anaphase promoting complex subunit 11
known_NIR_9182	chr17	82019381	82019510	-	82019381	82019641	A5SS	ENST00000392359.7	known	0.02	7	412	7	412	y	0.03	10	289	10	289	y	0.07	22	309	22	309	y	0.06	16	273	16	273	y	0.0298575	5.65685	up	ENSG00000169689.14	STRA13	protein_coding	stimulated by retinoic acid 13
known_NIR_9355	chr18	36033837	36067254	-	36033837;36040865	36040807;36067254	ES	ENST00000590898.5	known	0.94	264	15.5	264	13;18	y	0.93	340	24.5	340	26;23	y	0.9	274	30.5	274	28;33	y	0.89	294	36.5	294	38;35	y	0.0298575	-5.65685	down	ENSG00000141425.17	RPRD1A	protein_coding	regulation of nuclear pre-mRNA domain containing 1A
known_NIR_9371	chr18	36800311	36807847	-	36800311;36805397	36805374;36807847	ES	ENST00000593035.5	known	0.06	12	181	12	362;0	n	0.07	16	217.5	16	429;6	y	0.02	4	213	4	424;2	y	0.01	3	205	3	405;5	y	0.0194193	-7.07107	down	ENSG00000134779.14	TPGS2	protein_coding	tubulin polyglutamylase complex subunit 2
known_NIR_9566	chr19	11035132	11041298	+	11035132	11041307	A3SS	ENST00000344626.8	known	0.24	76	239	76	239	y	0.25	99	294	99	294	y	0.28	103	259	103	259	y	0.29	121	303	121	303	y	0.0298575	5.65685	up	ENSG00000127616.17	SMARCA4	protein_coding	SWI/SNF related, matrix associated, actin dependent regulator of chromatin, subfamily a, member 4
known_NIR_9797	chr19	18356011	18363391	+	18356011;18357615	18357383;18363391	ES	ENST00000269919.10	known	0.2	19	76.5	19	86;67	y	0.22	19	68	19	89;47	y	0.37	36	61.5	36	77;46	y	0.36	21	38	21	50;26	y	0.0155112	13.8636	up	ENSG00000130517.13	PGPEP1	protein_coding	pyroglutamyl-peptidase I
known_NIR_9826	chr19	18572179	18573293	+	18572607	18573293	A5SS&ES	ENST00000596273.5	known	0.38	196	324	196	324	y	0.37	161	276	161	276	y	0.34	195	380	195	380	y	0.33	170	352	170	352	y	0.0298575	-5.65685	down	ENSG00000221983.7	UBA52	protein_coding	ubiquitin A-52 residue ribosomal protein fusion product 1
known_NIR_10090	chr19	36102151	36102752	+	36102151	36102737	A3SS	ENST00000401500.6	known	0.33	18	37	18	37	y	0.29	16	40	16	40	y	0.14	10	61	10	61	y	0.12	8	60	8	60	y	0.0342344	-8.04984	down	ENSG00000075702.16	WDR62	protein_coding	WD repeat domain 62
known_NIR_10097	chr19	36322030	36330253	-	36322030	36322130	5pMXE	ENST00000427868.6	known	0.37	22	37	22	37	y	0.4	26	39	26	39	y	0.6	26	17	26	17	y	0.56	24	19	24	19	y	0.0198068	7.8	up	ENSG00000232677.6	LINC00665	lincRNA	long intergenic non-protein coding RNA 665
known_NIR_10099	chr19	36322030;36322384	36322130;36330253	-	36322030	36330253	cassetteExon	ENST00000585356.5	known	0.48	20	22	37;3	22	y	0.43	19.5	26	39;0	26	n	0.25	8.5	26	17;0	26	n	0.28	9.5	24	19;0	24	n	0.0366694	-6.51695	down	ENSG00000232677.6	LINC00665	lincRNA	long intergenic non-protein coding RNA 665
known_NIR_10173	chr19	38309643	38315747	-	38309643	38315717	A5SS	ENST00000329420.12	known	0.27	39	107	39	107	y	0.28	27	70	27	70	y	0.32	37	80	37	80	y	0.31	41	90	41	90	y	0.0298575	5.65685	up	ENSG00000167645.16	YIF1B	protein_coding	Yip1 interacting factor homolog B (S. cerevisiae)
known_NIR_10189	chr19	38893867;38898425	38898379;38899506	-	38893867	38899506	cassetteExon	ENST00000358931.9	known	0.09	6	60	9;3	60	y	0.1	3.5	30	2;5	30	y	0.22	17	62	21;13	62	y	0.23	24.5	82	26;23	82	y	0.00294551	18.3848	up	ENSG00000068903.19	SIRT2	protein_coding	sirtuin 2
known_NIR_10205	chr19	39354066	39356689	+	39342576	39356689	A5SS	ENST00000598913.5	known	0.56	110	86	110	86	y	0.54	139	117	139	117	y	0.44	82	104	82	104	y	0.47	112	126	112	126	y	0.0454248	-5.26965	down	ENSG00000179134.14	SAMD4B	protein_coding	sterile alpha motif domain containing 4B
known_NIR_10319	chr19	43984322	43988459	+	43984245	43988459	A5SS	ENST00000407951.6	known	0.33	6	12	6	12	y	0.27	3	8	3	8	y	0.07	1	13	1	13	n	0	0	10	0	10	n	0.0305143	-5.74866	down	ENSG00000204920.10	ZNF155	protein_coding	zinc finger protein 155
known_NIR_10515	chr19	49663514;49664673	49664443;49665631	-	49663514	49665631	cassetteExon	ENST00000377135.8	known	0.76	9.5	3	5;14	3	y	0.8	12	3	7;17	3	y	0.54	14	12	9;19	12	y	0.47	15	17	2;28	17	y	0.0364784	-6.82191	down	ENSG00000126456.15	IRF3	protein_coding	interferon regulatory factor 3
known_NIR_10516	chr19	49663514;49664673	49664553;49665631	-	49663514	49665631	cassetteExon	ENST00000377135.8	known	0.77	10	3	6;14	3	y	0.82	14	3	11;17	3	y	0.56	15.5	12	12;19	12	y	0.6	25	17	22;28	17	y	0.0241881	-6.71547	down	ENSG00000126456.15	IRF3	protein_coding	interferon regulatory factor 3
known_NIR_10622	chr19	52956104	52962727	-	52956104	52962717	A5SS	ENST00000391777.3	known	0.85	28	5	28	5	y	0.9	27	3	27	3	y	0.54	21	18	21	18	y	0.57	13	10	13	10	y	0.015845	-10.9759	down	ENSG00000221874.4	ZNF321P	protein_coding	zinc finger protein 321, pseudogene
known_NIR_10797	chr19	5928087	5931404	-	5928087	5931419	A5SS	ENST00000439268.6	known	0.51	92	89	92	89	y	0.49	86	89	86	89	y	0.6	122	83	122	83	y	0.62	101	62	101	62	y	0.0161301	7.77817	up	ENSG00000031823.14	RANBP3	protein_coding	RAN binding protein 3
known_NIR_10976	chr2	111314562	111344061	-	111248241	111344061	A3SS	ENST00000439362.5	known	0.31	10	22	10	22	y	0.34	34	67	34	67	y	0.18	13	60	13	60	y	0.19	12	50	12	50	y	0.0468821	-8.85438	down	ENSG00000172965.14	MIR4435-2HG	lincRNA	MIR4435-2 host gene
known_NIR_11021	chr2	113596578	113596671	+	113596582	113596671	A5SS	ENST00000453662.6	known	0.97	84	3	84	3	y	0.93	88	7	88	7	y	0.74	42	15	42	15	y	0.79	41	11	41	11	y	0.0318977	-5.77843	down	ENSG00000146556.14	WASH2P	transcribed_unprocessed_pseudogene	WAS protein family homolog 2 pseudogene
known_NIR_11068	chr2	121430177	121447337	-	121430177;121445496	121445449;121447337	ES	ENST00000541377.5	known	0.61	117	73.5	117	76;71	y	0.66	159	81.5	159	83;80	y	0.76	204	65	204	64;66	y	0.8	208	52	208	52;52	y	0.0495775	4.52904	up	ENSG00000074054.17	CLASP1	protein_coding	cytoplasmic linker associated protein 1
known_NIR_11127	chr2	137964628	137967097	+	137964628	137970165	A3SS	ENST00000410115.5	known	0.09	21	212	21	212	y	0.07	15	200	15	200	y	0.28	57	149	57	149	y	0.25	53	158	53	158	y	0.014634	10.262	up	ENSG00000150540.13	HNMT	protein_coding	histamine N-methyltransferase
known_NIR_11578	chr2	232697392	232735155	+	232697392;232703489	232703424;232735155	ES	ENST00000629305.2	known	0.33	19	38	19	26;50	y	0.34	12	23.5	12	12;35	y	0.15	6	34	6	15;53	y	0.17	6	29	6	18;40	y	0.012987	-15.6525	down	ENSG00000204120.14	GIGYF2	protein_coding	GRB10 interacting GYF protein 2
known_NIR_11662	chr2	241315982;241320287	241320203;241324216	+	241315982;241316555	241316422;241324216	MXE	ENST00000616972.4	known	0.71	32.5	13.5	11;54	8;19	y	0.68	25	12	11;39	11;13	y	0.83	30	6	14;46	12;0	n	0.81	33.5	8	10;57	16;0	n	0.0286201	6.93375	up	ENSG00000168385.17	2022-09-02	protein_coding	septin 2
known_NIR_12546	chr20	4686508	4699211	+	4686512	4699211	A5SS	ENST00000379440.8	known	0.75	9	3	9	3	y	0.7	14	6	14	6	y	0.36	8	14	8	14	y	0.33	20	41	20	41	y	0.0119866	-13.0339	down	ENSG00000171867.16	PRNP	protein_coding	prion protein
known_NIR_12713	chr20	63707097	63707867	-	63707097	63707810	5pMXE	ENST00000619493.4	known	0.84	21	4	21	4	y	0.85	29	5	29	5	y	0.75	15	5	15	5	y	0.77	10	3	10	3	y	0.037184	-7.60263	down	ENSG00000101246.19	ARFRP1	protein_coding	ADP-ribosylation factor related protein 1
known_NIR_12751	chr21	25729801	25734333	-	25729801	25734989	A5SS	ENST00000400099.5	known	0.51	74	71	74	71	y	0.52	70	65	70	65	y	0.57	101	75	101	75	y	0.58	108	77	108	77	y	0.0136061	8.48528	up	ENSG00000154723.12	ATP5J	protein_coding	ATP synthase, H+ transporting, mitochondrial Fo complex, subunit F6
known_NIR_12931	chr21	45134832	45171610	+	45128573	45171610	A5SS	ENST00000437626.5	known	0.42	84	118	84	118	y	0.45	80	99	80	99	y	0.53	124	109	124	109	y	0.55	138	114	138	114	y	0.0384207	5.82435	up	ENSG00000197381.15	ADARB1	protein_coding	adenosine deaminase, RNA-specific, B1
known_NIR_13090	chr22	20052584;20063442	20063338;20064542	+	20052584;20056013	20053437;20064542	MXE	ENST00000434570.6	known	0.54	27.5	23	2;53	46;0	n	0.53	35	30.5	2;68	57;4	y	0.65	44	23.5	13;75	43;4	y	0.66	49.5	25.5	0;99	51;0	n	0.00345424	16.9706	up	ENSG00000183597.15	TANGO2	protein_coding	transport and golgi organization 2 homolog (Drosophila)
known_NIR_13142	chr22	23957932	23958327	-	23957932	23958285	A5SS	ENST00000290765.8	known	0.12	10	75	10	75	y	0.1	9	79	9	79	y	0.23	20	66	20	66	y	0.2	13	51	13	51	y	0.0384207	5.82435	up	ENSG00000133433.10	GSTT2B	protein_coding	glutathione S-transferase theta 2B (gene/pseudogene)
known_NIR_13178	chr22	28695873;28696987	28696901;28699838	-	28695873	28699838	cassetteExon	ENST00000348295.7	known	0.82	218	49	269;167	49	y	0.84	253	49	326;180	49	y	0.91	182.5	19	241;124	19	y	0.93	206.5	16	254;159	16	y	0.0238129	6.36396	up	ENSG00000183765.20	CHEK2	protein_coding	checkpoint kinase 2
known_NIR_13255	chr22	31327309	31335692	-	31327309;31328859	31328787;31335692	ES	ENST00000405309.7	known	0.42	18	25	18	30;20	y	0.28	16	41	16	54;28	y	0.85	64	11	64	22;0	n	0.92	42	3.5	42	5;2	y	0.0433418	6.83598	up	ENSG00000100105.17	PATZ1	protein_coding	POZ (BTB) and AT hook containing zinc finger 1
known_NIR_13481	chr3	105550259	105552468	+	105550259;105552182	105552144;105552468	ES	ENST00000306107.9	known	0.21	62	234.5	62	251;218	y	0.22	75	270.5	75	279;262	y	0.27	99	273	99	295;251	y	0.26	99	278.5	99	291;266	y	0.0194193	7.07107	up	ENSG00000170017.12	ALCAM	protein_coding	activated leukocyte cell adhesion molecule
known_NIR_13653	chr3	130999659	131016152	+	130999659;131001314	131001220;131016152	ES	ENST00000507488.6	known	0.06	17	265.5	17	486;45	y	0.07	22	289	22	542;36	y	0.03	10	286	10	548;24	y	0.02	6	300	6	572;28	y	0.0298575	-5.65685	down	ENSG00000017260.19	ATP2C1	protein_coding	ATPase, Ca++ transporting, type 2C, member 1
known_NIR_13654	chr3	130999659	131016152	+	130999659;131001344	131001220;131016152	ES	ENST00000504381.5	known	0.06	17	289	17	486;92	y	0.07	22	299	22	542;56	y	0.03	10	307	10	548;66	y	0.02	6	324.5	6	572;77	y	0.0298575	-5.65685	down	ENSG00000017260.19	ATP2C1	protein_coding	ATPase, Ca++ transporting, type 2C, member 1
known_NIR_13732	chr3	138572914	138591854	-	138537347	138591854	A3SS	ENST00000489254.5	known	0.86	19	3	19	3	y	0.67	6	3	6	3	n	0	0	13	0	13	n	0.22	6	21	6	21	y	0.0476887	-4.50654	down	ENSG00000114107.8	CEP70	protein_coding	centrosomal protein 70kDa
known_NIR_13835	chr3	15585342;15589612	15589540;15591600	-	15585342;15586602	15586525;15591600	MXE	ENST00000628377.2	known	0.58	42.5	31	3;82	62;0	n	0.6	62	41	4;120	82;0	n	0.47	43.5	48.5	0;87	91;6	n	0.48	37.5	40.5	2;73	79;2	y	0.0239816	-10.2859	down	ENSG00000131373.14	HACL1	protein_coding	2-hydroxyacyl-CoA lyase 1
known_NIR_13897	chr3	169143832	169146477	-	169143832	169146723	A5SS	ENST00000464456.5	known	0.14	1	6	1	6	n	0.25	1	3	1	3	n	0.8	12	3	12	3	y	0.71	5	2	5	2	n	0.0175406	7.88029	up	ENSG00000085276.17	MECOM	protein_coding	MDS1 and EVI1 complex locus
known_NIR_13898	chr3	169143832	169146477	-	169143832	169381187	A5SS	ENST00000494292.5	known	0.04	1	23	1	23	n	0.08	1	12	1	12	n	0.33	12	24	12	24	y	0.38	5	8	5	8	y	0.0134093	9.21425	up	ENSG00000085276.17	MECOM	protein_coding	MDS1 and EVI1 complex locus
known_NIR_13950	chr3	183833589	183840570	-	183833589;183833825	183833724;183840570	ES	ENST00000317096.8	known	0.22	54	193	54	214;172	y	0.23	75	250	75	300;200	y	0.29	98	238.5	98	281;196	y	0.28	79	198.5	79	234;163	y	0.0136061	8.48528	up	ENSG00000175193.12	PARL	protein_coding	presenilin associated, rhomboid-like
known_NIR_14103	chr3	23217312	23270950	+	23217312	23499608	A3SS	ENST00000425792.5	known	0.04	5	131	5	131	y	0.05	9	185	9	185	y	0.12	28	205	28	205	y	0.14	24	149	24	149	y	0.037184	7.60263	up	ENSG00000182247.9	UBE2E2	protein_coding	ubiquitin-conjugating enzyme E2E 2
known_NIR_14208	chr3	42621516;42627227	42627200;42630546	+	42621516	42630546	cassetteExon	ENST00000232978.12	known	0.6	25.5	17	38;13	17	y	0.65	33	18	33;33	18	y	0.43	20	27	28;12	27	y	0.37	31	53	35;27	53	y	0.0310012	-5.76166	down	ENSG00000114857.17	NKTR	protein_coding	natural killer cell triggering receptor
known_NIR_14243	chr3	4727173	4733088	+	4711868	4733088	A5SS	ENST00000357086.8	known	0.04	5	132	5	132	y	0.03	7	218	7	218	y	0.1	22	199	22	199	y	0.09	20	197	20	197	y	0.0136061	8.48528	up	ENSG00000150995.17	ITPR1	protein_coding	inositol 1,4,5-trisphosphate receptor, type 1
known_NIR_14312	chr3	48695418	48715315	-	48695421	48715315	A3SS	ENST00000431721.6	known	0.3	3	7	3	7	y	0.25	3	9	3	9	y	0.78	7	2	7	2	n	0.83	15	3	15	3	y	0.0044205	14.9907	up	ENSG00000068745.14	IP6K2	protein_coding	inositol hexakisphosphate kinase 2
known_NIR_14336	chr3	49016086	49016158	-	49016060	49016158	A3SS	ENST00000441576.6	known	0.75	95	32	95	32	y	0.77	149	45	149	45	y	0.86	101	17	101	17	y	0.84	103	19	103	19	y	0.0238129	6.36396	up	ENSG00000178149.16	DALRD3	protein_coding	DALR anticodon binding domain containing 3
known_NIR_14356	chr3	49470433	49476849	+	49470433;49471049	49470965;49476849	ES	ENST00000545947.5	known	0.39	7	11	7	13;9	y	0.38	13	21	13	16;26	y	0.22	5	18	5	21;15	y	0.23	3	10	3	8;12	y	0.00194742	-22.6274	down	ENSG00000173402.11	DAG1	protein_coding	dystroglycan 1 (dystrophin-associated glycoprotein 1)
known_NIR_14447	chr3	51961304	51967326	-	51961304	51961941	5pMXE	ENST00000471622.5	known	0.65	26	14	26	14	y	0.62	33	20	33	20	y	0.76	54	17	54	17	y	0.78	40	11	40	11	y	0.025109	7.48845	up	ENSG00000090097.20	PCBP4	protein_coding	poly(rC) binding protein 4
known_NIR_14588	chr3	88058223	88140970	-	88058223	88058815	5pMXE	ENST00000309534.10	known	0.14	12	75	12	75	y	0.12	15	111	15	111	y	0.03	3	117	3	117	y	0.04	4	110	4	110	y	0.0316556	-8.49706	down	ENSG00000163320.10	CGGBP1	protein_coding	CGG triplet repeat binding protein 1
known_NIR_14790	chr4	141720566;141721177	141721059;141721924	+	141720566	141721924	cassetteExon	ENST00000320650.8	known	0.42	13.5	19	11;16	19	y	0.38	15	25	16;14	25	y	0.26	14.5	42	4;25	42	y	0.21	9.5	35	13;6	35	y	0.0392905	-5.15373	down	ENSG00000164136.16	IL15	protein_coding	interleukin 15
known_NIR_14869	chr4	1802025;1803064	1802914;1804330	+	1802025;1803836	1803692;1804330	MXE	ENST00000481110.6	known	0.94	51	3	47;55	1;5	n	0.99	52.5	0.5	52;53	0;1	n	0.78	27	7.5	21;33	6;9	y	0.83	31.5	6.5	29;34	3;10	y	0.04552	-4.52548	down	ENSG00000068078.17	FGFR3	protein_coding	fibroblast growth factor receptor 3
known_NIR_14939	chr4	26620688	26637211	+	26584292	26637211	A5SS	ENST00000511789.5	known	1	12	0	12	0	n	0.95	35	2	35	2	y	0.79	26	7	26	7	y	0.76	22	7	22	7	y	0.0337883	-6.85994	down	ENSG00000109680.10	TBC1D19	protein_coding	TBC1 domain family, member 19
known_NIR_15013	chr4	48831496	48832620	+	48831249	48832620	A5SS	ENST00000264312.11	known	0.24	59	186	59	186	y	0.29	86	208	86	208	y	0.46	167	196	167	196	y	0.41	177	258	177	258	y	0.0406345	4.80833	up	ENSG00000109180.14	OCIAD1	protein_coding	OCIA domain containing 1
known_NIR_15099	chr4	82857764	82861631	-	82857764	82863318	A5SS	ENST00000348405.8	known	0.34	117	223	117	223	y	0.37	161	280	161	280	y	0.46	228	264	228	264	y	0.44	155	200	155	200	y	0.0454248	5.26965	up	ENSG00000138674.16	SEC31A	protein_coding	SEC31 homolog A (S. cerevisiae)
known_NIR_15223	chr5	111507442	111512391	-	111507442	111512385	A5SS	ENST00000296632.7	known	0.13	21	145	21	145	y	0.14	29	184	29	184	y	0.17	21	100	21	100	y	0.18	37	167	37	167	y	0.0298575	5.65685	up	ENSG00000164211.12	STARD4	protein_coding	StAR-related lipid transfer (START) domain containing 4
known_NIR_15453	chr5	148425701	148427213	+	148425701	148433424	A3SS	ENST00000296701.10	known	0.63	71	41	71	41	y	0.62	67	41	67	41	y	0.69	61	28	61	28	y	0.7	95	40	95	40	y	0.0100505	9.89949	up	ENSG00000145868.16	FBXO38	protein_coding	F-box protein 38
known_NIR_15512	chr5	154858768;154865385	154865192;154870661	+	154858768	154870661	cassetteExon	ENST00000521450.5	known	0.96	189	7	31;347	7	y	0.94	204.5	12	31;378	12	y	0.87	195	28	24;366	28	y	0.89	199	24	55;343	24	y	0.0384761	-4.94975	down	ENSG00000155508.13	CNOT8	protein_coding	CCR4-NOT transcription complex, subunit 8
known_NIR_15629	chr5	177441053	177441735	+	177441053	177441737	A3SS	ENST00000355472.9	known	0.45	28	34	28	34	y	0.46	37	44	37	44	y	0.36	25	44	25	44	y	0.34	18	35	18	35	y	0.0273751	-9.39149	down	ENSG00000198055.10	GRK6	protein_coding	G protein-coupled receptor kinase 6
known_NIR_16097	chr6	111416472;111472140	111472013;111482750	-	111416472	111482750	cassetteExon	ENST00000368802.7	known	0.24	5.5	17	6;5	17	y	0.27	6	16	12;0	16	n	0.09	1	10	1;1	10	n	0.1	4.5	40	1;8	40	n	0.0398973	-10.1193	down	ENSG00000009413.15	REV3L	protein_coding	REV3-like, polymerase (DNA directed), zeta, catalytic subunit
known_NIR_16233	chr6	143438694	143450563	-	143438694	143441438	5pMXE	ENST00000606514.5	known	0.41	31	44	31	44	y	0.47	29	33	29	33	y	0.65	33	18	33	18	y	0.71	58	24	58	24	y	0.0298575	5.65685	up	ENSG00000189007.15	ADAT2	protein_coding	adenosine deaminase, tRNA-specific 2
known_NIR_16290	chr6	150885734	150887842	+	150885734	150887845	A3SS	ENST00000367321.7	known	0.48	162	178	162	178	y	0.47	200	223	200	223	y	0.56	224	178	224	178	y	0.55	248	200	248	200	y	0.00772212	11.3137	up	ENSG00000120254.15	MTHFD1L	protein_coding	methylenetetrahydrofolate dehydrogenase (NADP+ dependent) 1-like
known_NIR_16536	chr6	311962	345854	+	311962;335163	335114;345854	ES	ENST00000344450.9	known	0.38	18	30	18	34;26	y	0.33	16	32.5	16	37;28	y	0.54	44	37	44	42;32	y	0.5	39	39.5	39	40;39	y	0.0392905	5.15373	up	ENSG00000112679.14	DUSP22	protein_coding	dual specificity phosphatase 22
known_NIR_16539	chr6	31271348	31271599	-	31271348	31356688	A5SS	ENST00000620806.4	known	0.57	246	188	246	188	y	0.56	343	269	343	269	y	0.63	378	225	378	225	y	0.64	422	237	422	237	y	0.0100505	9.89949	up	ENSG00000204525.14	HLA-C	protein_coding	major histocompatibility complex, class I, C
known_NIR_16749	chr6	42616090	42617240	+	42616090	42617409	A3SS	ENST00000372903.6	known	0.12	11	84	11	84	y	0.11	9	75	9	75	y	0.04	6	131	6	131	y	0.05	3	52	3	52	y	0.0100505	-9.89949	down	ENSG00000024048.10	UBR2	protein_coding	ubiquitin protein ligase E3 component n-recognin 2
known_NIR_16774	chr6	43478232	43497881	+	43478232;43478718	43478659;43497881	ES	ENST00000372444.6	known	0.77	108	33	108	38;28	y	0.81	118	27	118	29;25	y	0.62	107	65	107	63;67	y	0.59	71	50	71	58;42	y	0.0217889	-7.4	down	ENSG00000137221.14	TJAP1	protein_coding	tight junction associated protein 1 (peripheral)
known_NIR_16817	chr6	44226167	44227263	+	44219782	44227263	A5SS	ENST00000427851.6	known	0.46	100	116	100	116	y	0.47	99	112	99	112	y	0.52	130	120	130	120	y	0.53	146	129	146	129	y	0.0136061	8.48528	up	ENSG00000112759.16	SLC29A1	protein_coding	solute carrier family 29 (equilibrative nucleoside transporter), member 1
known_NIR_17052	chr7	102476270	102478811	-	102476270	102478808	A5SS	ENST00000292614.9	known	0.18	178	826	178	826	y	0.19	213	923	213	923	y	0.15	159	911	159	911	y	0.14	176	1068	176	1068	y	0.0298575	-5.65685	down	ENSG00000005075.15	POLR2J	protein_coding	polymerase (RNA) II (DNA directed) polypeptide J, 13.3kDa
known_NIR_17230	chr7	13989139	13989268	-	13989139	13990553	A5SS	ENST00000242066.9	known	0.9	46	5	46	5	y	0.88	84	11	84	11	y	0.8	77	19	77	19	y	0.79	42	11	42	11	y	0.0316556	-8.49706	down	ENSG00000006468.13	ETV1	protein_coding	ets variant 1
known_NIR_17444	chr7	30074132	30117970	+	30074132	30078590	3pMXE	ENST00000449726.5	known	0.22	11	39	11	39	y	0.2	10	41	10	41	y	0.05	4	70	4	70	y	0.02	1	47	1	47	n	0.016102	-9.70725	down	ENSG00000106086.18	PLEKHA8	protein_coding	pleckstrin homology domain containing, family A (phosphoinositide binding specific) member 8
known_NIR_17533	chr7	43758734;43760110	43760017;43771138	+	43758734	43771138	cassetteExon	ENST00000265523.8	known	0.03	1.5	55	0;3	55	n	0.05	3.5	63	2;5	63	y	0.13	6	41	2;10	41	y	0.12	9	63	5;13	63	y	0.037184	7.60263	up	ENSG00000106605.10	BLVRA	protein_coding	biliverdin reductase A
known_NIR_17543	chr7	44013679	44016434	-	44014783	44016434	A3SS	ENST00000326391.6	known	0.26	28	81	28	81	y	0.24	20	65	20	65	y	0.14	14	86	14	86	y	0.17	21	101	21	101	y	0.0454248	-5.26965	down	ENSG00000272655.1	POLR2J4	transcribed_unprocessed_pseudogene	polymerase (RNA) II (DNA directed) polypeptide J4, pseudogene
known_NIR_17645	chr7	51065449	51085166	-	51083228	51085166	A3SS&ES	ENST00000395542.6	known	0.1	13	112	13	112	y	0.09	8	81	8	81	y	0.03	4	120	4	120	y	0.02	2	101	2	101	y	0.0100505	-9.89949	down	ENSG00000106078.17	COBL	protein_coding	cordon-bleu WH2 repeat protein
known_NIR_17930	chr7	99562494	99571688	+	99562494	99563863	3pMXE	ENST00000320583.9	known	0.12	19	139	19	139	y	0.11	22	172	22	172	y	0.2	42	173	42	173	y	0.18	35	159	35	159	y	0.0445338	6.7082	up	ENSG00000197343.10	ZNF655	protein_coding	zinc finger protein 655
known_NIR_17935	chr7	99902174	99903218	-	99892746	99903218	A3SS	ENST00000355947.6	known	0.15	8	46	8	46	y	0.23	14	48	14	48	y	0.55	29	24	29	24	y	0.46	18	21	18	21	y	0.0356579	5.23187	up	ENSG00000146833.15	TRIM4	protein_coding	tripartite motif containing 4
known_NIR_18310	chr8	22197420	22201118	+	22197420	22201803	A3SS	ENST00000306385.9	known	0.48	199	219	199	219	y	0.47	165	185	165	185	y	0.58	235	170	235	170	y	0.57	189	143	189	143	y	0.00496281	14.1421	up	ENSG00000168487.17	BMP1	protein_coding	bone morphogenetic protein 1
known_NIR_18318	chr8	22602312	22602537	+	22602312	22602561	A3SS	ENST00000409586.7	known	0.54	38	32	38	32	y	0.53	51	46	51	46	y	0.65	73	40	73	40	y	0.64	72	40	72	40	y	0.00410679	15.5563	up	ENSG00000241852.9	C8orf58	protein_coding	chromosome 8 open reading frame 58
known_NIR_18552	chr8	73688813;73709162	73709032;73738284	-	73688813	73738284	cassetteExon	ENST00000522695.5	known	0.18	22	97	23;21	97	y	0.19	23	97	18;28	97	y	0.12	12	84	16;8	84	y	0.13	15.5	107	13;18	107	y	0.0136061	-8.48528	down	ENSG00000040341.17	STAU2	protein_coding	staufen double-stranded RNA binding protein 2
known_NIR_18668	chr9	100429662	100441906	+	100427393	100441906	A5SS	ENST00000395067.6	known	0.39	26	41	26	41	y	0.44	26	33	26	33	y	0.66	52	27	52	27	y	0.6	54	36	54	36	y	0.0337266	5.50559	up	ENSG00000066697.14	MSANTD3	protein_coding	Myb/SANT-like DNA-binding domain containing 3
known_NIR_18688	chr9	106930689	106932263	+	106930689	106932446	A3SS	ENST00000277225.9	known	0.14	3	19	3	19	y	0.13	4	27	4	27	y	0.22	4	14	4	14	y	0.24	4	13	4	13	y	0.0316556	8.49706	up	ENSG00000148143.12	ZNF462	protein_coding	zinc finger protein 462
known_NIR_18841	chr9	127803404	127804285	+	127803062	127804285	A5SS	ENST00000393706.6	known	0.41	172	247	172	247	y	0.43	194	253	194	253	y	0.49	257	266	257	266	y	0.5	238	235	238	235	y	0.0445338	6.7082	up	ENSG00000136877.14	FPGS	protein_coding	folylpolyglutamate synthase
known_NIR_18904	chr9	129120610;129123138	129123052;129131522	+	129120610;129129110	129128985;129131522	MXE	ENST00000357197.8	known	0.55	336	269.5	651;21	19;520	y	0.54	397	340.5	783;11	25;656	y	0.51	421	397.5	836;6	40;755	y	0.5	423	425	830;16	45;805	y	0.0298575	-5.65685	down	ENSG00000119383.19	PPP2R4	protein_coding	protein phosphatase 2A activator, regulatory subunit 4
known_NIR_18963	chr9	129923939	129924960	-	129924026	129924960	A3SS	ENST00000446176.6	known	0.18	27	123	27	123	y	0.2	37	146	37	146	y	0.13	22	146	22	146	y	0.11	16	136	16	136	y	0.0384761	-4.94975	down	ENSG00000187239.16	FNBP1	protein_coding	formin binding protein 1
known_NIR_19232	chr9	65682857	65692571	+	65682857;65691026	65690967;65692571	ES	ENST00000382405.7	known	0.36	48	86.5	48	85;88	y	0.3	36	83.5	36	67;100	y	0.57	64	48.5	64	32;65	y	0.5	59	60	59	47;73	y	0.0490518	4.44707	up	ENSG00000147996.16	CBWD5	protein_coding	COBW domain containing 5
known_NIR_19254	chr9	69750950	69759853	-	69734254	69759853	A3SS	ENST00000377200.9	known	0.95	106	6	106	6	y	0.94	91	6	91	6	y	0.98	86	2	86	2	y	0.99	78	1	78	1	n	0.0298575	5.65685	up	ENSG00000188647.12	PTAR1	protein_coding	protein prenyltransferase alpha subunit repeat containing 1
known_NIR_19306	chr9	87974035	87974372	-	87974074	87974372	A3SS	ENST00000336654.9	known	0.96	24	1	24	1	n	1	17	0	17	0	n	0.73	19	7	19	7	y	0.75	21	7	21	7	y	0.0225398	-10.7331	down	ENSG00000156345.17	CDK20	protein_coding	cyclin-dependent kinase 20
known_NIR_19310	chr9	89405699;89418437	89418056;89455888	-	89405699	89455888	cassetteExon	ENST00000422704.6	known	0.68	12.5	6	12;13	6	y	0.69	33	15	52;14	15	y	0.57	17	13	29;5	13	y	0.56	19	15	25;13	15	y	0.00345424	-16.9706	down	ENSG00000187764.11	SEMA4D	protein_coding	sema domain, immunoglobulin domain (Ig), transmembrane domain (TM) and short cytoplasmic domain, (semaphorin) 4D
known_NIR_19354	chr9	97912975	97913401	-	97910616	97913401	A3SS	ENST00000375119.7	known	0.1	8	69	8	69	y	0.09	10	97	10	97	y	0.03	3	87	3	87	y	0.01	1	85	1	85	n	0.0445338	-6.7082	down	ENSG00000136932.13	C9orf156	protein_coding	chromosome 9 open reading frame 156
known_NIR_19649	chrX	154507490	154508289	-	154507490;154507861	154507811;154508289	ES	ENST00000359889.9	known	0.08	12	133	12	139;127	y	0.06	10	146	10	142;150	y	0.21	29	106.5	29	121;92	y	0.19	29	124	29	110;138	y	0.0116283	9.19239	up	ENSG00000071889.16	FAM3A	protein_coding	family with sequence similarity 3, member A
known_NIR_19720	chrX	24152830	24172715	+	24152830;24161842	24161715;24172715	ES	ENST00000379177.5	known	0.73	16	6	16	0;12	n	0.76	8	2.5	8	4;1	n	0.33	6	12	6	7;17	y	0.32	4	8.5	4	6;11	y	0.0123497	-26.5631	down	ENSG00000005889.15	ZFX	protein_coding	zinc finger protein, X-linked
known_NIR_19784	chrX	47142440	47142584	-	47142440	47142614	A5SS	ENST00000377811.3	known	0.24	353	1127	353	1127	y	0.25	367	1130	367	1130	y	0.29	410	997	410	997	y	0.3	416	952	416	952	y	0.0194193	7.07107	up	ENSG00000147123.10	NDUFB11	protein_coding	NADH dehydrogenase (ubiquinone) 1 beta subcomplex, 11, 17.3kDa
known_NIR_19946	chrX	77688927	77696577	-	77688927;77693937	77693824;77696577	ES	ENST00000373344.9	known	0.15	17	95	17	70;120	y	0.18	22	101	22	104;98	y	0.3	43	101.5	43	94;109	y	0.31	41	91	41	64;118	y	0.0468821	8.85438	up	ENSG00000085224.20	ATRX	protein_coding	alpha thalassemia/mental retardation syndrome X-linked
novel_NIR_17	chr1	100266624	100268137	+	100266624	100267500	A3SS&ES	ENST00000260563.4	novel	0.67	4	2	4	2	y	0.62	8	5	8	5	y	0.2	2	8	2	8	y	0.24	8	25	8	25	y	0.00673577	-13.2748	down	ENSG00000137996.12	RTCA	protein_coding	RNA 3'-terminal phosphate cyclase
novel_NIR_88	chr1	1051815	1053725	+	1051815	1051993	A3SS&ES	ENST00000620552.4	novel	0.19	8	35	8	35	y	0.25	17	51	17	51	y	0.49	21	22	21	22	y	0.42	19	26	19	26	y	0.038166	5.09787	up	ENSG00000188157.13	AGRN	protein_coding	agrin
novel_NIR_120	chr1	108648991;108650085	108650004;108650211	-	108648991;108649433	108649341;108650211	MXE	ENST00000370031.5	novel	0.62	4	2.5	1;7	2;3	n	0.67	7	3.5	5;9	4;3	y	0.25	1	3	2;0	2;4	n	0.16	2	10.5	1;3	9;12	n	0.0268237	-8.54732	down	ENSG00000162639.15	HENMT1	protein_coding	HEN1 methyltransferase homolog 1 (Arabidopsis)
novel_NIR_162	chr1	109273670	109274416	+	109273670	109274022	A3SS	ENST00000271332.3	novel	0.4	2	3	2	3	y	0.31	4	9	4	9	y	0.88	7	1	7	1	y	1	1	0	1	0	n	0.0198068	7.8	up	ENSG00000143126.7	CELSR2	protein_coding	cadherin, EGF LAG seven-pass G-type receptor 2
novel_NIR_311	chr1	112850392	112877730	+	112876984	112877730	A5SS&ES	ENST00000456651.1	novel	0.12	1	7	1	7	n	0.15	2	11	2	11	y	0.33	2	4	2	4	y	0.37	10	17	10	17	y	0.0165861	8.6	up	ENSG00000224167.1	RP3-522D1.1	lincRNA		--
novel_NIR_1119	chr1	155085642	155085877	+	155085404	155085877	A5SS	ENST00000505139.1	novel	0.55	44	36	44	36	y	0.54	51	44	51	44	y	0.43	33	43	33	43	y	0.42	62	85	62	85	y	0.00345424	-16.9706	down	ENSG00000251246.1	RP11-540D14.8	protein_coding		--
novel_NIR_1184	chr1	155309076	155310043	+	155309076;155309965	155309789;155310043	ES	ENST00000356657.10	novel	0.71	190	76	190	27;125	y	0.69	249	114.5	249	59;170	y	0.79	304	79.5	304	27;132	y	0.8	275	70	275	22;118	y	0.0316556	8.49706	up	ENSG00000160752.14	FDPS	protein_coding	farnesyl diphosphate synthase
novel_NIR_1220	chr1	155969300	155969969	-	155969300	155978067	A5SS	ENST00000313695.11	novel	0.35	9	17	9	17	y	0.42	16	22	16	22	y	0.16	5	26	5	26	y	0.09	5	51	5	51	n	0.0343842	-5.25279	down	ENSG00000116584.17	ARHGEF2	protein_coding	Rho/Rac guanine nucleotide exchange factor (GEF) 2
novel_NIR_1457	chr1	161168127	161168993	+	161168127;161168576	161168432;161168993	ES	ENST00000352210.9	novel	0.04	1	25.5	1	24;27	n	0	0	27	0	13;41	n	0.18	6	26.5	6	34;19	y	0.24	3	9.5	3	5;14	y	0.0454248	5.26965	up	ENSG00000143224.17	PPOX	protein_coding	protoporphyrinogen oxidase
novel_NIR_1513	chr1	163248598	163306233	-	163300691	163306233	3pMXE	ENST00000429865.5	novel	0	0	4	0	4	n	0.17	1	5	1	5	n	0.86	6	1	6	1	y	0.73	8	3	8	3	y	0.0259437	6.63522	up	ENSG00000232995.7	RGS5	antisense	regulator of G-protein signaling 5
novel_NIR_1769	chr1	17603591	17616094	+	17603591;17607977	17607802;17616094	ES	ENST00000375415.5	novel	0.14	7	41.5	7	31;52	n	0.11	9	75.5	9	67;84	n	0.31	18	40.5	18	34;47	y	0.26	15	43	15	32;54	y	0.0481499	5.48795	up	ENSG00000074964.16	ARHGEF10L	protein_coding	Rho guanine nucleotide exchange factor (GEF) 10-like
novel_NIR_1865	chr1	186406268;186411893	186411811;186417544	+	186406268	186417544	cassetteExon	ENST00000367470.7	novel	0.22	23.5	81	25;22	81	y	0.19	30	127	22;38	127	y	0.11	16	126	13;19	126	n	0.08	16	174	14;18	174	n	0.0352362	-5.18545	down	ENSG00000157181.14	C1orf27	protein_coding	chromosome 1 open reading frame 27
novel_NIR_2064	chr1	204400789	204409492	-	204406313	204409492	3pMXE	ENST00000367188.4	novel	0.09	24	229	24	229	n	0.06	17	255	17	255	n	0.16	41	221	41	221	y	0.18	46	212	46	212	y	0.0454248	5.26965	up	ENSG00000158615.8	PPP1R15B	protein_coding	protein phosphatase 1, regulatory subunit 15B
novel_NIR_2229	chr1	211829323;211830330	211830183;211830573	-	211829323	211830573	cassetteExon	ENST00000366997.8	novel	0.61	19	12	13;25	12	y	0.62	15	9	17;13	9	y	0.51	24.5	24	21;28	24	y	0.53	20	18	23;17	18	y	0.0316556	-8.49706	down	ENSG00000123684.12	LPGAT1	protein_coding	lysophosphatidylglycerol acyltransferase 1
novel_NIR_2292	chr1	21557544	21560626	+	21509517	21560626	A5SS	ENST00000539907.5	novel	0.29	35	87	35	87	y	0.26	20	57	20	57	y	0.46	38	44	38	44	y	0.41	40	58	40	58	y	0.0481499	5.48795	up	ENSG00000162551.13	ALPL	protein_coding	alkaline phosphatase, liver/bone/kidney
novel_NIR_2570	chr1	228317751	228317895	+	228317751	228317892	A3SS	ENST00000284548.15	novel	0.26	7	20	7	20	y	0.27	11	30	11	30	y	0.46	16	19	16	19	y	0.44	15	19	15	19	y	0.0119719	16.5469	up	ENSG00000154358.19	OBSCN	protein_coding	obscurin, cytoskeletal calmodulin and titin-interacting RhoGEF
novel_NIR_2678	chr1	235484515	235494681	-	235484515;235489268	235489168;235494681	ES	ENST00000366600.7	novel	0.07	13	160.5	13	168;153	n	0.09	17	165	17	179;151	n	0.16	26	139.5	26	177;102	y	0.17	30	143.5	30	181;106	y	0.037184	7.60263	up	ENSG00000162885.12	B3GALNT2	protein_coding	beta-1,3-N-acetylgalactosaminyltransferase 2
novel_NIR_2732	chr1	23967723	23971338	-	23967723	23971850	A5SS	ENST00000484146.6	novel	0.19	9	38	9	38	y	0.21	21	79	21	79	y	0.1	9	82	9	82	n	0.12	9	67	9	67	n	0.0238129	-6.36396	down	ENSG00000188529.14	SRSF10	protein_coding	serine/arginine-rich splicing factor 10
novel_NIR_2738	chr1	239678288	239907433	+	239678288;239827378	239827252;239907433	ES	ENST00000255380.8	novel	0.61	7	4.5	7	0;9	y	0.56	5	4	5	4;4	y	0.27	2	5.5	2	0;11	y	0.25	2	6	2	3;9	y	0.0264259	-12.0702	down	ENSG00000133019.11	CHRM3	protein_coding	cholinergic receptor, muscarinic 3
novel_NIR_2790	chr1	244053200	244053788	+	244048993	244053788	A5SS	ENST00000622512.1	novel	0.62	5	3	5	3	y	0.7	7	3	7	3	y	0.22	2	7	2	7	y	0.25	6	18	6	18	y	0.0364641	-9.9485	down	ENSG00000179456.10	ZBTB18	protein_coding	zinc finger and BTB domain containing 18
novel_NIR_2879	chr1	25550035	25553922	+	25543786	25553922	A5SS	ENST00000374338.4	novel	0	0	20	0	20	n	0.04	2	43	2	43	n	0.22	6	21	6	21	y	0.2	9	35	9	35	y	0.0316556	8.49706	up	ENSG00000157978.11	LDLRAP1	protein_coding	low density lipoprotein receptor adaptor protein 1
novel_NIR_3012	chr1	28592744	28593694	+	28592399	28593694	A5SS	ENST00000373826.3	novel	0.36	8	14	8	14	y	0.38	8	13	8	13	y	0.2	2	8	2	8	y	0.19	6	26	6	26	y	0.012987	-15.6525	down	ENSG00000188060.6	RAB42	protein_coding	RAB42, member RAS oncogene family
novel_NIR_3070	chr1	31668855	31670556	-	31668855	31670602	A5SS	ENST00000373672.7	novel	0	0	12	0	12	n	0.03	1	28	1	28	n	0.42	5	7	5	7	y	0.41	7	10	7	10	y	0.0131059	25.2982	up	ENSG00000084636.17	COL16A1	protein_coding	collagen, type XVI, alpha 1
novel_NIR_3424	chr1	39847747	39847986	-	39847297	39847986	A3SS	ENST00000537440.5	novel	1	9	0	9	0	y	0.91	21	2	21	2	y	0.35	9	17	9	17	y	0.5	12	12	12	12	y	0.0411664	-6.05962	down	ENSG00000043514.15	TRIT1	protein_coding	tRNA isopentenyltransferase 1
novel_NIR_3571	chr1	43801545	43814891	+	43792149	43814891	A5SS	ENST00000545417.5	novel	0.17	8	39	8	39	y	0.13	6	41	6	41	n	0	0	23	0	23	n	0.03	2	68	2	68	n	0.0383286	-5.4	down	ENSG00000126091.19	ST3GAL3	protein_coding	ST3 beta-galactoside alpha-2,3-sialyltransferase 3
novel_NIR_3610	chr1	43980957	43981109	+	43979511	43981109	A5SS	ENST00000372324.5	novel	0.07	1	14	1	14	n	0.1	2	19	2	19	n	0.35	14	26	14	26	y	0.29	10	25	10	25	y	0.0418331	7.00635	up	ENSG00000117411.16	B4GALT2	protein_coding	UDP-Gal:betaGlcNAc beta 1,4- galactosyltransferase, polypeptide 2
novel_NIR_3694	chr1	45012285	45012857	+	45012285	45012907	A3SS	ENST00000246337.8	novel	0.15	26	147	26	147	y	0.14	18	115	18	115	n	0.07	10	142	10	142	n	0.08	10	121	10	121	n	0.0100505	-9.89949	down	ENSG00000126088.12	UROD	protein_coding	uroporphyrinogen decarboxylase
novel_NIR_3769	chr1	45685620	45686993	-	45685620	45686412	5pMXE	ENST00000355105.7	novel	0.08	7	79	7	79	n	0.1	12	104	12	104	n	0.19	23	97	23	97	y	0.18	29	128	29	128	y	0.0316556	8.49706	up	ENSG00000159592.10	GPBP1L1	protein_coding	GC-rich promoter binding protein 1-like 1
novel_NIR_3776	chr1	46175409	46181100	+	46175409;46180658	46180526;46181100	ES	ENST00000372003.5	novel	0.06	1	14.5	1	3;26	n	0	0	11.5	0	0;23	n	0.19	3	12.5	3	7;18	y	0.23	7	23	7	8;38	y	0.049697	4.9923	up	ENSG00000117472.9	TSPAN1	protein_coding	tetraspanin 1
novel_NIR_3784	chr1	46247746	46248512	+	46247746;46248408	46248344;46248512	ES	ENST00000442598.5	novel	0.12	6	43	6	0;86	n	0.16	7	35.5	7	0;71	y	0.31	11	24.5	11	0;49	y	0.37	14	23.5	14	0;47	y	0.0416957	5.547	up	ENSG00000085999.11	RAD54L	protein_coding	RAD54-like (S. cerevisiae)
novel_NIR_3895	chr1	53271346;53272642	53272604;53280587	-	53271346;53275753	53275631;53280587	MXE	ENST00000465675.5	novel	0.57	107.5	80	213;2	59;101	y	0.56	158	126.5	316;0	156;97	n	0.46	128.5	150	256;1	157;143	n	0.44	101	127	202;0	121;133	n	0.0239816	-10.2859	down	ENSG00000157193.14	LRP8	protein_coding	low density lipoprotein receptor-related protein 8, apolipoprotein e receptor
novel_NIR_4516	chr1	96812928	96813273	+	96812928	96813029	A3SS&ES	ENST00000370198.5	novel	0.03	2	63	2	63	n	0.09	10	107	10	107	n	0.3	32	73	32	73	y	0.25	25	75	25	75	y	0.0337266	5.50559	up	ENSG00000117569.18	PTBP2	protein_coding	polypyrimidine tract binding protein 2
novel_NIR_4517	chr1	96812928	96813273	+	96812928;96813106	96813029;96813273	ES	ENST00000609116.5	novel	0.04	2	46.5	2	63;30	n	0.1	10	88	10	107;69	n	0.38	32	53	32	73;33	y	0.31	25	54.5	25	75;34	y	0.0284668	5.96559	up	ENSG00000117569.18	PTBP2	protein_coding	polypyrimidine tract binding protein 2
novel_NIR_5364	chr10	27048979	27051059	-	27048979	27053320	A5SS	ENST00000436985.6	novel	0.05	2	38	2	38	n	0.07	3	43	3	43	n	0.24	13	41	13	41	y	0.27	13	35	13	35	y	0.0133654	10.8167	up	ENSG00000107890.16	ANKRD26	protein_coding	ankyrin repeat domain 26
novel_NIR_5449	chr10	310092;311566	311537;327006	-	310092	327006	cassetteExon	ENST00000381496.7	novel	0.27	8	22	6;10	22	y	0.23	5	17	4;6	17	y	0.1	3	28	3;3	28	n	0.13	5	33	5;5	33	n	0.0383286	-5.4	down	ENSG00000151240.15	DIP2C	protein_coding	DIP2 disco-interacting protein 2 homolog C (Drosophila)
novel_NIR_5660	chr10	45784901	45786612	+	45784901	45787035	A3SS	ENST00000540872.5	novel	0	0	5	0	5	n	0.17	1	5	1	5	n	0.56	15	12	15	12	y	0.7	7	3	7	3	y	0.0413651	4.94944	up	ENSG00000172661.17	FAM21C	protein_coding	family with sequence similarity 21, member C
novel_NIR_5941	chr10	5712918	5720544	+	5712918;5717750	5717659;5720544	ES	ENST00000328090.9	novel	0.21	7	26	7	15;37	y	0.26	15	42	15	15;69	y	0	0	36	0	20;52	n	0.06	2	30.5	2	7;54	n	0.0368256	-5.24951	down	ENSG00000108021.19	FAM208B	protein_coding	family with sequence similarity 208, member B
novel_NIR_6113	chr10	69182654	69185987	+	69180562	69185987	A5SS	ENST00000359655.8	novel	0.07	7	91	7	91	n	0.05	5	89	5	89	n	0.16	19	101	19	101	n	0.17	23	111	23	111	y	0.0273751	9.39149	up	ENSG00000156502.13	SUPV3L1	protein_coding	suppressor of var1, 3-like 1 (S. cerevisiae)
novel_NIR_6339	chr10	77854358	77856730	-	77854370	77856730	A3SS	ENST00000372391.6	novel	0.13	12	79	12	79	n	0.11	18	143	18	143	n	0.27	44	120	44	120	y	0.26	46	128	46	128	y	0.0170999	12.9692	up	ENSG00000151208.16	DLG5	protein_coding	discs, large homolog 5 (Drosophila)
novel_NIR_6478	chr10	89645499	89648923	+	89645457	89648923	A5SS	ENST00000454174.5	novel	0.09	1	10	1	10	n	0.33	2	4	2	4	y	1	4	0	4	0	y	0.83	5	1	5	1	y	0.0499266	4.79414	up	ENSG00000232936.5	RP11-80H5.2	antisense		--
novel_NIR_6491	chr10	91485303	91491200	+	91485303;91487778	91487682;91491200	ES	ENST00000446394.5	novel	0.23	23	76.5	23	93;60	y	0.22	16	57	16	64;50	y	0.11	9	71.5	9	75;68	n	0.09	9	87.5	9	101;74	n	0.0212375	-11.1803	down	ENSG00000165338.16	HECTD2	protein_coding	HECT domain containing E3 ubiquitin protein ligase 2
novel_NIR_6979	chr11	121047667	121053630	+	121047667	121053551	A3SS	ENST00000529397.5	novel	0.3	11	26	11	26	y	0.28	17	44	17	44	y	0.21	12	44	12	44	y	0.2	12	47	12	47	y	0.037184	-7.60263	down	ENSG00000154114.12	TBCEL	protein_coding	tubulin folding cofactor E-like
novel_NIR_7073	chr11	123730985	123740417	-	123730985	123741549	A5SS	ENST00000529691.1	novel	0.26	6	17	6	17	y	0.27	9	24	9	24	y	0.61	30	19	30	19	y	0.67	20	10	20	10	y	0.0453306	12.3299	up	ENSG00000166261.10	ZNF202	protein_coding	zinc finger protein 202
novel_NIR_7236	chr11	12980999	12986040	-	12984338	12986040	A3SS&ES	ENST00000526388.1	novel	0.62	5	3	5	3	y	0.73	8	3	8	3	y	0.25	5	15	5	15	y	0.31	5	11	5	11	y	0.043758	-6.30489	down	ENSG00000251381.6	LINC00958	lincRNA	long intergenic non-protein coding RNA 958
novel_NIR_7396	chr11	18317907	18322077	-	18312024	18322077	A3SS	ENST00000531848.1	novel	0.12	2	14	2	14	n	0.11	4	32	4	32	n	0.36	4	7	4	7	n	0.35	9	17	9	17	y	0.000866927	33.9411	up	ENSG00000110756.17	HPS5	protein_coding	Hermansky-Pudlak syndrome 5
novel_NIR_7569	chr11	31453092	31456260	-	31433570	31456260	A3SS	ENST00000532287.5	novel	0.07	1	14	1	14	n	0	0	23	0	23	n	0.41	15	22	15	22	y	0.5	4	4	4	4	n	0.021018	7.36729	up	ENSG00000148950.9	IMMP1L	protein_coding	IMP1 inner mitochondrial membrane peptidase-like (S. cerevisiae)
novel_NIR_7661	chr11	33698514;33702737	33702668;33710206	-	33698514	33710206	cassetteExon	ENST00000534312.5	novel	0.03	0.5	19	0;1	19	n	0	0	36	0;0	36	n	0.47	47.5	54	5;90	54	y	0.41	47.5	69	4;91	69	y	0.017691	12.6711	up	ENSG00000085063.14	CD59	protein_coding	CD59 molecule, complement regulatory protein
novel_NIR_7749	chr11	36594641	36610081	+	36594915	36610081	5pMXE	ENST00000617650.4	novel	0.8	24	6	24	6	y	0.77	34	10	34	10	y	1	47	0	47	0	y	0.97	35	1	35	1	y	0.0110636	9.42809	up	ENSG00000166352.15	C11orf74	protein_coding	chromosome 11 open reading frame 74
novel_NIR_7887	chr11	47258129	47259791	+	47248999	47259791	A5SS	ENST00000395397.7	novel	0.1	1	9	1	9	n	0	0	4	0	4	n	0.86	6	1	6	1	y	0.75	6	2	6	2	y	0.00984605	10.1574	up	ENSG00000025434.18	NR1H3	protein_coding	nuclear receptor subfamily 1, group H, member 3
novel_NIR_8128	chr11	61333329;61333650	61333549;61334620	+	61333329	61334620	cassetteExon	ENST00000394900.7	novel	0.12	11	82	13;9	82	n	0.1	9.5	86	12;7	86	n	0.3	19	45	21;17	45	y	0.26	16.5	46	22;11	46	y	0.037184	7.60263	up	ENSG00000149476.14	TKFC	protein_coding	triokinase/FMN cyclase
novel_NIR_8205	chr11	61813353	61815074	-	61813353	61814796	A5SS	ENST00000542506.5	novel	0.38	11	18	11	18	y	0.34	13	25	13	25	y	0.17	7	34	7	34	y	0.19	10	42	10	42	y	0.0342344	-8.04984	down	ENSG00000149485.16	FADS1	protein_coding	fatty acid desaturase 1
novel_NIR_8637	chr11	66748517	66759043	+	66748517;66756505	66756353;66759043	ES	ENST00000525908.5	novel	0.32	6	13	6	19;7	y	0.38	7	11.5	7	11;12	y	0.17	2	10	2	16;4	y	0.12	2	14.5	2	26;3	n	0.0368256	-5.24951	down	ENSG00000173715.15	C11orf80	protein_coding	chromosome 11 open reading frame 80
novel_NIR_8891	chr11	72035975;72068231	72068105;72069842	-	72035975;72062686	72062589;72069842	MXE	ENST00000358965.10	novel	0.85	14	2.5	17;11	5;0	y	0.86	12	2	5;19	4;0	y	0.75	25.5	8.5	16;35	17;0	y	0.73	17.5	6.5	6;29	13;0	y	0.0239816	-10.2859	down	ENSG00000137497.17	NUMA1	protein_coding	nuclear mitotic apparatus protein 1
novel_NIR_8945	chr11	72817855	72821199	+	72817855	72821668	A3SS	ENST00000321297.9	novel	0.36	5	9	5	9	y	0.43	3	4	3	4	y	0	0	13	0	13	n	0.09	1	10	1	10	n	0.029338	-6.13941	down	ENSG00000168010.10	ATG16L2	protein_coding	autophagy related 16-like 2 (S. cerevisiae)
novel_NIR_9018	chr11	74636275	74668777	+	74636275	74640564	3pMXE	ENST00000263681.6	novel	0.16	25	132	25	132	y	0.15	35	203	35	203	y	0.02	4	169	4	169	n	0.04	6	139	6	139	n	0.0212375	-11.1803	down	ENSG00000077514.8	POLD3	protein_coding	polymerase (DNA-directed), delta 3, accessory subunit
novel_NIR_9372	chr11	9139854	9140189	-	9139854	9141974	A5SS	ENST00000530044.5	novel	0.45	17	21	17	21	y	0.48	40	43	40	43	n	0.62	34	21	34	21	y	0.59	37	26	37	26	n	0.0221976	6.59966	up	ENSG00000184014.7	DENND5A	protein_coding	DENN/MADD domain containing 5A
novel_NIR_9429	chr11	95888261	95923692	-	95888261	95923875	A5SS	ENST00000346299.9	novel	0.07	11	139	11	139	n	0.08	10	113	10	113	n	0.2	30	121	30	121	y	0.18	31	145	31	145	y	0.0239816	10.2859	up	ENSG00000087053.18	MTMR2	protein_coding	myotubularin related protein 2
novel_NIR_9509	chr12	102124041;102153976	102153869;102165729	+	102124041;102164608	102164438;102165729	MXE	ENST00000543784.5	novel	0.29	19	47	27;11	0;94	y	0.27	24.5	66	24;25	13;119	y	0.21	16.5	60.5	18;15	3;118	y	0.19	9.5	40	14;5	20;60	y	0.0298575	-5.65685	down	ENSG00000185480.11	PARPBP	protein_coding	PARP1 binding protein
novel_NIR_9905	chr12	119710620;119711093	119711049;119712178	-	119710620	119712178	cassetteExon	ENST00000392521.6	novel	0.06	5	77	7;3	77	n	0.1	6	54	7;5	54	n	0.24	17.5	54	15;20	54	y	0.21	16.5	62	17;16	62	y	0.033757	5.8	up	ENSG00000122966.13	CIT	protein_coding	citron rho-interacting serine/threonine kinase
novel_NIR_10005	chr12	122380558	122399781	-	122380558	122422521	A5SS	ENST00000361654.8	novel	0.33	37	75	37	75	n	0.31	46	104	46	104	n	0.4	50	76	50	76	y	0.39	56	89	56	89	n	0.0445338	6.7082	up	ENSG00000130779.19	CLIP1	protein_coding	CAP-GLY domain containing linker protein 1
novel_NIR_10021	chr12	122835006	122848031	+	122835643	122848031	5pMXE	ENST00000253083.8	novel	0.24	36	114	36	114	y	0.26	32	93	32	93	y	0.15	20	113	20	113	y	0.16	16	82	16	82	y	0.0316556	-8.49706	down	ENSG00000130787.13	HIP1R	protein_coding	huntingtin interacting protein 1 related
novel_NIR_10206	chr12	131844081;131844633	131844266;131845118	+	131844081	131845118	cassetteExon	ENST00000360564.5	novel	0.17	28.5	142	30;27	142	y	0.18	26	115	17;35	115	y	0.06	9	131	10;8	131	n	0.08	12	138	9;15	138	n	0.0273751	-9.39149	down	ENSG00000198598.6	MMP17	protein_coding	matrix metallopeptidase 17 (membrane-inserted)
novel_NIR_10261	chr12	132822311;132825106	132824919;132828803	-	132822311	132828803	cassetteExon	ENST00000545875.2	novel	0	0	55	0;0	55	n	0.05	4.5	82	9;0	82	n	0.2	13	52	23;3	52	y	0.17	7	34	14;0	34	n	0.0481499	5.48795	up	ENSG00000090615.12	GOLGA3	protein_coding	golgin A3
novel_NIR_10283	chr12	132986873;133006208	133006057;133007042	+	132986873	133007042	cassetteExon	ENST00000328654.9	novel	0.5	2	2	4;0	2	n	0.47	3.5	4	7;0	4	n	0.62	6.5	4	12;1	4	n	0.67	6	3	9;3	3	y	0.0481499	5.48795	up	ENSG00000198393.7	ZNF26	protein_coding	zinc finger protein 26
novel_NIR_10308	chr12	133130754;133139249	133139199;133144434	+	133130754	133144434	cassetteExon	ENST00000248211.10	novel	0.05	0.5	10	0;1	10	n	0	0	10	0;0	10	n	0.2	3	12	4;2	12	y	0.26	2.5	7	2;3	7	y	0.0368256	5.24951	up	ENSG00000256223.5	ZNF10	protein_coding	zinc finger protein 10
novel_NIR_10399	chr12	21506976	21512295	+	21506976	21507944	3pMXE	ENST00000631252.2	novel	0.2	5	20	5	20	y	0.24	10	32	10	32	y	0	0	24	0	24	n	0.06	3	48	3	48	n	0.0454248	-5.26965	down	ENSG00000111711.9	GOLT1B	protein_coding	golgi transport 1B
novel_NIR_10408	chr12	22457161	22459492	-	22457161;22458585	22458484;22459492	ES	ENST00000446597.5	novel	0.14	2	12.5	2	13;12	n	0.15	4	23	4	26;20	y	0.34	6	11.5	6	15;8	y	0.33	13	26	13	23;29	y	0.00138217	26.8701	up	ENSG00000111731.12	C2CD5	protein_coding	C2 calcium-dependent domain containing 5
novel_NIR_10876	chr12	48825769	48826245	+	48825769	48826367	A3SS	ENST00000540990.5	novel	0.15	9	51	9	51	y	0.13	10	68	10	68	n	0.05	3	56	3	56	n	0.03	3	83	3	83	n	0.0194193	-7.07107	down	ENSG00000167535.7	CACNB3	protein_coding	calcium channel, voltage-dependent, beta 3 subunit
novel_NIR_10881	chr12	48925678	48939655	-	48903908	48939655	A3SS	ENST00000398092.4	novel	0.53	19	17	19	17	y	0.47	9	10	9	10	y	0.3	11	26	11	26	y	0.22	4	14	4	14	y	0.0471695	-4.8	down	ENSG00000272822.1	RP11-302B13.5	protein_coding		--
novel_NIR_11144	chr12	53501708	53503730	+	53501708	53502015	A3SS&ES	ENST00000394357.6	novel	0.23	6	20	6	20	y	0.19	5	22	5	22	y	0	0	24	0	24	n	0.03	1	31	1	31	n	0.0198068	-7.8	down	ENSG00000139546.10	TARBP2	protein_coding	TAR (HIV-1) RNA binding protein 2
novel_NIR_11203	chr12	54183959	54187046	-	54183959	54187819	A5SS	ENST00000513838.5	novel	0.2	21	82	21	82	y	0.19	22	91	22	91	n	0.1	14	127	14	127	n	0.09	10	105	10	105	n	0.00496281	-14.1421	down	ENSG00000123415.14	SMUG1	protein_coding	single-strand-selective monofunctional uracil-DNA glycosylase 1
novel_NIR_11381	chr12	56568186	56568975	+	56522089	56568975	A5SS	ENST00000550726.5	novel	0.29	2	5	2	5	y	0.21	5	19	5	19	y	1	6	0	6	0	n	0.89	32	4	32	4	y	0.0127075	10.2195	up	ENSG00000076067.11	RBMS2	protein_coding	RNA binding motif, single stranded interacting protein 2
novel_NIR_11504	chr12	57604858;57606029	57605989;57606190	+	57604858	57606190	cassetteExon	ENST00000548804.5	novel	1	2.5	0	3;2	0	y	0.83	5	1	5;5	1	y	0	0	8	0;0	8	n	0.07	0.5	7	0;1	7	n	0.0345622	-9.57314	down	ENSG00000178498.15	DTX3	protein_coding	deltex 3, E3 ubiquitin ligase
novel_NIR_11739	chr12	6967335	6967892	-	6967238	6967892	A3SS	ENST00000440277.5	novel	0.03	2	70	2	70	n	0.02	2	102	2	102	n	0.17	10	49	10	49	y	0.18	14	62	14	62	y	0.00221484	21.2132	up	ENSG00000215021.8	PHB2	protein_coding	prohibitin 2
novel_NIR_11784	chr12	7115219	7118267	+	7115219	7115386	A3SS	ENST00000541775.5	novel	0.2	14	56	14	56	y	0.17	9	43	9	43	y	0.35	21	39	21	39	y	0.4	27	40	27	40	y	0.0366694	6.51695	up	ENSG00000205885.7	C1RL-AS1	antisense	C1RL antisense RNA 1
novel_NIR_12275	chr13	113210374	113218945	+	113210063	113218945	A5SS	ENST00000617546.4	novel	0.04	1	26	1	26	n	0.09	4	41	4	41	n	0.21	8	31	8	31	y	0.24	4	13	4	13	n	0.0481499	5.48795	up	ENSG00000139842.14	CUL4A	protein_coding	cullin 4A
novel_NIR_12357	chr13	19852190	19863450	-	19852190;19862466	19862399;19863450	ES	ENST00000337963.8	novel	0.03	1	36.5	1	41;32	n	0.05	2	38	2	43;33	n	0.14	6	37	6	40;34	n	0.17	10	49	10	44;54	y	0.0329611	6.37905	up	ENSG00000132950.18	ZMYM5	protein_coding	zinc finger, MYM-type 5
novel_NIR_12591	chr13	41261825	41262411	-	41261825	41262215	A5SS&ES	ENST00000379477.5	novel	0.26	5	14	5	14	n	0.21	3	11	3	11	n	0.69	20	9	20	9	y	0.71	37	15	37	15	n	0.0165513	17.2697	up	ENSG00000120662.15	MTRF1	protein_coding	mitochondrial translational release factor 1
novel_NIR_12826	chr13	75805760	75809154	+	75805760;75808199	75807480;75809154	ES	ENST00000357063.7	novel	0.24	3	9.5	3	8;11	y	0.43	8	10.5	8	4;17	y	0.88	7	1	7	2;0	y	1	2	0	2	0;0	y	0.0466918	5.38443	up	ENSG00000136153.19	LMO7	protein_coding	LIM domain 7
novel_NIR_12999	chr14	102195120;102221658	102221557;102222830	+	102195120;102209862	102197755;102222830	MXE	ENST00000424963.6	novel	0.8	6	1.5	10;2	2;1	y	0.67	2	1	3;1	0;2	n	0.15	3	16.5	0;6	15;18	n	0.11	0.5	4	0;1	5;3	n	0.0494909	-8.8961	down	ENSG00000140153.17	WDR20	protein_coding	WD repeat domain 20
novel_NIR_13056	chr14	103677523	103679408	+	103677523	103679384	A3SS	ENST00000348520.10	novel	0.27	116	317	116	317	y	0.29	187	452	187	452	y	0.17	114	554	114	554	y	0.2	148	584	148	584	y	0.0454248	-5.26965	down	ENSG00000126214.20	KLC1	protein_coding	kinesin light chain 1
novel_NIR_13549	chr14	39399787;39401861	39401698;39431564	-	39399787	39431564	cassetteExon	ENST00000554190.1	novel	0.08	1	11	0;2	11	n	0	0	4	0;0	4	n	0.5	2	2	4;0	2	n	0.43	4.5	6	6;3	6	y	0.0160728	7.99613	up	ENSG00000165355.7	FBXO33	protein_coding	F-box protein 33
novel_NIR_14134	chr14	76803912;76804415	76804375;76806416	-	76803912	76806416	cassetteExon	ENST00000251089.6	novel	0.12	4	29	6;2	29	n	0.15	4	23	5;3	23	y	0.02	1	43	2;0	43	n	0.05	2.5	45	5;0	45	n	0.0421737	-4.71405	down	ENSG00000013523.9	ANGEL1	protein_coding	angel homolog 1 (Drosophila)
novel_NIR_14506	chr15	25062088	25070120	+	25062088;25064855	25064715;25070120	ES	ENST00000549804.6	novel	0.3	3	7	3	11;3	y	0.26	4	11.5	4	19;4	y	0.07	2	26.5	2	48;5	n	0.04	1	22.5	1	40;5	n	0.0152674	-9	down	ENSG00000224078.12	SNHG14	processed_transcript	small nucleolar RNA host gene 14
novel_NIR_14531	chr15	25099278;25100890	25100779;25103859	+	25099278	25103859	cassetteExon	ENST00000549804.6	novel	0.22	19.5	69	16;23	69	y	0.2	19.5	79	17;22	79	y	0.09	8	84	8;8	84	n	0.06	7	109	4;10	109	n	0.025109	-7.48845	down	ENSG00000224078.12	SNHG14	processed_transcript	small nucleolar RNA host gene 14
novel_NIR_14533	chr15	25103970;25105824	25105700;25106164	+	25103970	25106164	cassetteExon	ENST00000549804.6	novel	0.27	24	64	26;22	64	y	0.29	39.5	97	30;49	97	y	0.19	21.5	89	19;24	89	y	0.18	23	108	18;28	108	y	0.0316556	-8.49706	down	ENSG00000224078.12	SNHG14	processed_transcript	small nucleolar RNA host gene 14
novel_NIR_14861	chr15	42813854	42817032	-	42811780	42817032	A3SS	ENST00000267890.10	novel	0.2	8	33	8	33	y	0.18	9	41	9	41	y	0.02	1	45	1	45	n	0	0	32	0	32	n	0.00611627	-12.7279	down	ENSG00000128881.16	TTBK2	protein_coding	tau tubulin kinase 2
novel_NIR_15018	chr15	49622430	49625113	+	49621193	49625113	A5SS	ENST00000558653.5	novel	0	0	15	0	15	n	0.06	1	17	1	17	n	0.47	7	8	7	8	y	0.42	10	14	10	14	y	0.00974746	10.6271	up	ENSG00000104047.14	DTWD1	protein_coding	DTW domain containing 1
novel_NIR_15031	chr15	50725323;50726126	50726073;50726321	-	50725323	50726321	cassetteExon	ENST00000261854.9	novel	0.2	14.5	57	14;15	57	y	0.21	18.5	69	12;25	69	y	0.12	8.5	61	8;9	61	n	0.1	14	127	9;19	127	n	0.0316556	-8.49706	down	ENSG00000138600.9	SPPL2A	protein_coding	signal peptide peptidase like 2A
novel_NIR_15157	chr15	60386086;60393440	60393038;60397943	-	60386086;60390317	60390213;60397943	MXE	ENST00000396024.7	novel	0.39	45	70	32;58	130;10	y	0.42	57.5	81	42;73	149;13	y	0.21	41.5	153	35;48	271;35	y	0.26	49	140	38;60	244;36	y	0.0437537	-5.83095	down	ENSG00000182718.16	ANXA2	protein_coding	annexin A2
novel_NIR_15158	chr15	60386086;60393440	60393239;60397943	-	60386086;60390317	60390213;60397943	MXE	ENST00000396024.7	novel	0.31	32	70	6;58	130;10	y	0.32	38	81	3;73	149;13	y	0.18	33	153	18;48	271;35	y	0.2	36	140	12;60	244;36	y	0.0212375	-11.1803	down	ENSG00000182718.16	ANXA2	protein_coding	annexin A2
novel_NIR_15162	chr15	60386086;60396427	60396373;60397943	-	60386086;60390317	60390213;60397943	MXE	ENST00000396024.7	novel	0.22	19.5	70	13;26	130;10	y	0.25	26.5	81	8;45	149;13	y	0.13	23	153	12;34	271;35	n	0.15	25.5	140	5;46	244;36	y	0.0454248	-5.26965	down	ENSG00000182718.16	ANXA2	protein_coding	annexin A2
novel_NIR_15168	chr15	60390317;60393440	60393038;60397943	-	60390317	60397943	cassetteExon	ENST00000396024.7	novel	0.75	30.5	10	3;58	10	y	0.74	37.5	13	2;73	13	y	0.44	27.5	35	7;48	35	y	0.45	30	36	0;60	36	n	0.000555093	-42.4264	down	ENSG00000182718.16	ANXA2	protein_coding	annexin A2
novel_NIR_15170	chr15	60390317;60396427	60396016;60397943	-	60390317	60397943	cassetteExon	ENST00000396024.7	novel	0.58	14	10	2;26	10	y	0.63	22.5	13	0;45	13	n	0.33	17	35	0;34	35	n	0.39	23	36	0;46	36	n	0.026453	-6.27381	down	ENSG00000182718.16	ANXA2	protein_coding	annexin A2
novel_NIR_15171	chr15	60390317;60396427	60396151;60397943	-	60390317	60397943	cassetteExon	ENST00000396024.7	novel	0.58	14	10	2;26	10	y	0.65	24.5	13	4;45	13	y	0.33	17	35	0;34	35	n	0.39	23	36	0;46	36	n	0.0327893	-5.53173	down	ENSG00000182718.16	ANXA2	protein_coding	annexin A2
novel_NIR_15174	chr15	60390317;60396427	60396382;60397943	-	60390317	60397943	cassetteExon	ENST00000396024.7	novel	0.57	13	10	0;26	10	n	0.63	22.5	13	0;45	13	n	0.35	19	35	4;34	35	y	0.39	23	36	0;46	36	n	0.0329611	-6.37905	down	ENSG00000182718.16	ANXA2	protein_coding	annexin A2
novel_NIR_15486	chr15	72219110	72237391	-	72219110	72229547	5pMXE	ENST00000568459.5	novel	0.71	20	8	20	8	y	0.75	9	3	9	3	y	0.59	13	9	13	9	y	0.62	31	19	31	19	y	0.0439076	-5	down	ENSG00000067225.17	PKM	protein_coding	pyruvate kinase, muscle
novel_NIR_15721	chr15	78590098	78593092	+	78589849	78593092	A5SS	ENST00000559554.5	novel	0.92	12	1	12	1	y	0.94	16	1	16	1	y	0.2	4	16	4	16	y	0.19	3	13	3	13	y	0.00157852	-65.7404	down	ENSG00000169684.13	CHRNA5	protein_coding	cholinergic receptor, nicotinic, alpha 5 (neuronal)
novel_NIR_15723	chr15	78590104	78593092	+	78589849	78593092	A5SS	ENST00000559554.5	novel	0.96	25	1	25	1	y	0.93	14	1	14	1	y	0.47	14	16	14	16	y	0.48	12	13	12	13	y	0.0107684	-29.7254	down	ENSG00000169684.13	CHRNA5	protein_coding	cholinergic receptor, nicotinic, alpha 5 (neuronal)
novel_NIR_15918	chr15	84637420	84638354	+	84637420	84638396	A3SS	ENST00000348993.9	novel	0.29	4	10	4	10	y	0.32	6	13	6	13	y	0.12	3	21	3	21	n	0.08	1	11	1	11	n	0.0180874	-8.2	down	ENSG00000176700.19	SCAND2P	transcribed_unprocessed_pseudogene	SCAN domain containing 2 pseudogene
novel_NIR_16063	chr15	90969120	90969524	-	90969120	90969447	A5SS	ENST00000394249.7	novel	0.17	42	206	42	206	y	0.16	44	223	44	223	y	0.12	35	246	35	246	n	0.11	34	268	34	268	n	0.0194193	-7.07107	down	ENSG00000198901.13	PRC1	protein_coding	protein regulator of cytokinesis 1
novel_NIR_16082	chr15	92884236	92885515	+	92883543	92885515	A5SS	ENST00000629685.2	novel	1	1	0	1	0	n	0.83	15	3	15	3	y	0	0	10	0	10	n	0.08	1	11	1	11	n	0.0302313	-9.31431	down	ENSG00000279765.3	RP11-437B10.1	protein_coding		--
novel_NIR_16561	chr16	20898797	20900204	-	20896381	20900204	A3SS	ENST00000564349.5	novel	0.59	17	12	17	12	y	0.67	12	6	12	6	y	0.33	5	10	5	10	y	0.41	11	16	11	16	y	0.044221	-4.59619	down	ENSG00000196678.13	ERI2	protein_coding	ERI1 exoribonuclease family member 2
novel_NIR_16621	chr16	21847541;21852046	21851770;21857259	-	21847541	21857259	cassetteExon	ENST00000415645.6	novel	0.02	2	83	1;3	83	n	0.07	3	40	2;4	40	n	0.25	14	41	1;27	41	n	0.19	13.5	59	2;25	59	y	0.0491613	4.48129	up	ENSG00000185864.16	NPIPB4	protein_coding	nuclear pore complex interacting protein family, member B4
novel_NIR_16642	chr16	22435812	22436642	-	22435812	22437005	A5SS	ENST00000551766.5	novel	0.29	5	12	5	12	y	0.38	5	8	5	8	y	0.08	1	12	1	12	n	0	0	2	0	2	n	0.0403027	-4.89968	down	ENSG00000257122.5	RRN3P3	transcribed_unprocessed_pseudogene	RNA polymerase I transcription factor homolog (S. cerevisiae) pseudogene 3
novel_NIR_16671	chr16	2329854	2339655	-	2329854	2340573	A5SS	ENST00000301732.9	novel	0.2	12	48	12	48	y	0.22	22	78	22	78	y	0.31	26	58	26	58	y	0.3	23	53	23	53	y	0.0316556	8.49706	up	ENSG00000167972.13	ABCA3	protein_coding	ATP-binding cassette, sub-family A (ABC1), member 3
novel_NIR_16876	chr16	2912154;2913250	2913006;2914176	+	2912154	2914176	cassetteExon	ENST00000253928.13	novel	0.12	13	92	7;19	92	n	0.1	14	120	15;13	120	n	0.2	22	86	8;36	86	y	0.22	29	100	18;40	100	y	0.0194193	7.07107	up	ENSG00000059122.16	FLYWCH1	protein_coding	FLYWCH-type zinc finger 1
novel_NIR_16964	chr16	30076475	30081200	+	30076475	30082484	A3SS	ENST00000627746.2	novel	0.5	10	10	10	10	y	0.47	19	21	19	21	y	0.16	5	27	5	27	y	0.22	12	42	12	42	y	0.0301112	-8.7952	down	ENSG00000149923.13	PPP4C	protein_coding	protein phosphatase 4, catalytic subunit
novel_NIR_17234	chr16	398385	398990	+	398394	398990	A5SS	ENST00000620944.4	novel	0.54	19	16	19	16	y	0.58	7	5	7	5	y	0.39	9	14	9	14	y	0.37	22	38	22	38	y	0.0342344	-8.04984	down	ENSG00000103202.12	NME4	protein_coding	NME/NM23 nucleoside diphosphate kinase 4
novel_NIR_17379	chr16	533998;540371	540093;546817	+	533998;536142	536029;546817	MXE	ENST00000219611.6	novel	0.29	3	7.5	3;3	10;5	y	0.15	1.5	8.5	0;3	7;10	n	0.62	7.5	4.5	3;12	4;5	y	0.74	13	4.5	17;9	9;0	y	0.0397146	4.9894	up	ENSG00000103326.10	CAPN15	protein_coding	calpain 15
novel_NIR_17478	chr16	57479688	57480295	-	57479688	57486305	A5SS	ENST00000340099.8	novel	0.54	27	23	27	23	y	0.59	42	29	42	29	y	0.77	36	11	36	11	y	0.72	47	18	47	18	y	0.0364821	5.09117	up	ENSG00000125170.10	DOK4	protein_coding	docking protein 4
novel_NIR_17631	chr16	670557	670892	+	670557;670773	670675;670892	ES	ENST00000315082.8	novel	0.07	18	233	18	263;203	n	0.09	19	204.5	19	211;198	n	0.17	34	170	34	181;159	y	0.18	34	153	34	170;136	y	0.0316556	8.49706	up	ENSG00000140983.13	RHOT2	protein_coding	ras homolog family member T2
novel_NIR_17895	chr16	71864242;71868344	71867893;71879907	-	71864242;71865048	71864903;71879907	MXE	ENST00000313565.10	novel	0	0	4.5	0;0	9;0	n	0.07	0.5	6.5	0;1	12;1	n	0.44	3.5	4.5	7;0	9;0	n	0.36	5	9	8;2	18;0	y	0.0215087	6.86726	up	ENSG00000102984.14	ZNF821	protein_coding	zinc finger protein 821
novel_NIR_18255	chr16	86548577	86554645	-	86548577;86552146	86552033;86554645	ES	ENST00000360900.10	novel	0.13	7	46.5	7	43;50	n	0.15	9	53	9	48;58	y	0.23	22	73	22	83;63	y	0.24	21	66.5	21	62;71	y	0.0316556	8.49706	up	ENSG00000103248.17	MTHFSD	protein_coding	methenyltetrahydrofolate synthetase domain containing
novel_NIR_18256	chr16	86548577	86554645	-	86548577;86552292	86552179;86554645	ES	ENST00000546093.5	novel	0.12	7	53	7	62;44	n	0.16	9	48	9	35;61	y	0.39	22	34	22	35;33	y	0.42	21	28.5	21	25;32	y	0.0113199	10.6	up	ENSG00000103248.17	MTHFSD	protein_coding	methenyltetrahydrofolate synthetase domain containing
novel_NIR_18350	chr16	8859335	8868532	-	8859335;8868160	8868049;8868532	ES	ENST00000618335.4	novel	0.33	8	16.5	8	27;6	y	0.34	10	19.5	10	29;10	y	0.42	12	16.5	12	33;0	y	0.43	9	12	9	23;1	y	0.00611627	12.7279	up	ENSG00000153048.10	CARHSP1	protein_coding	calcium regulated heat stable protein 1, 24kDa
novel_NIR_18494	chr16	89707954	89708857	-	89707954;89708531	89708427;89708857	ES	ENST00000561976.5	novel	0.14	2	12	2	13;11	n	0.17	4	20	4	19;21	y	0.31	9	20.5	9	16;25	y	0.36	8	14	8	14;14	y	0.0399629	6.17395	up	ENSG00000075399.12	VPS9D1	protein_coding	VPS9 domain containing 1
novel_NIR_18529	chr16	89910351	89910591	+	89909083	89910591	A5SS	ENST00000263347.11	novel	0.5	8	8	8	8	y	0.61	17	11	17	11	n	0	0	6	0	6	n	0.12	4	28	4	28	n	0.0264578	-6.08152	down	ENSG00000141002.18	TCF25	protein_coding	transcription factor 25 (basic helix-loop-helix)
novel_NIR_19176	chr17	2956009	2957759	+	2905368	2957759	A5SS	ENST00000540393.6	novel	0.12	9	65	9	65	n	0.13	11	71	11	71	n	0.17	20	98	20	98	n	0.18	13	61	13	61	y	0.0194193	7.07107	up	ENSG00000132359.13	RAP1GAP2	protein_coding	RAP1 GTPase activating protein 2
novel_NIR_19233	chr17	30631979	30633098	+	30631895	30633098	A5SS	ENST00000398851.7	novel	0.84	21	4	21	4	y	0.87	41	6	41	6	y	0.69	34	15	34	15	y	0.7	30	13	30	13	y	0.0398973	-10.1193	down	ENSG00000250462.8	LRRC37BP1	transcribed_unprocessed_pseudogene	leucine rich repeat containing 37B pseudogene 1
novel_NIR_19326	chr17	35824099	35833907	+	35824198	35833907	A5SS	ENST00000605844.5	novel	0.15	152	863	152	863	y	0.16	188	969	188	969	y	0.22	278	980	278	980	y	0.23	294	959	294	959	y	0.0100505	9.89949	up	ENSG00000270647.5	TAF15	protein_coding	TAF15 RNA polymerase II, TATA box binding protein (TBP)-associated factor, 68kDa
novel_NIR_19510	chr17	40178381;40181455	40181299;40181616	+	40178381	40181616	cassetteExon	ENST00000620260.4	novel	0.25	1	3	2;0	3	n	0.24	3.5	11	5;2	11	y	0.12	1	7	1;1	7	n	0.1	1	9	2;0	9	n	0.0189814	-12.0748	down	ENSG00000108352.11	RAPGEFL1	protein_coding	Rap guanine nucleotide exchange factor (GEF)-like 1
novel_NIR_19616	chr17	42130590	42133199	-	42130590	42131607	A5SS&ES	ENST00000393860.7	novel	0.31	5	11	5	11	y	0.33	4	8	4	8	y	0.05	1	20	1	20	n	0	0	16	0	16	n	0.0299802	-10.956	down	ENSG00000108774.14	RAB5C	protein_coding	RAB5C, member RAS oncogene family
novel_NIR_19683	chr17	42951894	42954876	-	42951894;42953778	42953724;42954876	ES	ENST00000427569.6	novel	0.12	13	93.5	13	109;78	n	0.13	20	128.5	20	136;121	n	0.21	24	90	24	93;87	y	0.19	23	98	23	100;96	y	0.0445338	6.7082	up	ENSG00000266967.6	AARSD1	protein_coding	alanyl-tRNA synthetase domain containing 1
novel_NIR_19727	chr17	43202712	43209901	+	43201780	43209901	A5SS	ENST00000542611.5	novel	0.15	5	29	5	29	n	0.18	5	23	5	23	n	0.39	19	30	19	30	y	0.38	11	18	11	18	y	0.0271205	13.914	up	ENSG00000188554.13	NBR1	protein_coding	neighbor of BRCA1 gene 1
novel_NIR_20080	chr17	4952890	4953272	+	4952890;4953109	4953051;4953272	ES	ENST00000323997.10	novel	0.11	17	139.5	17	140;139	n	0.09	20	193	20	191;195	n	0.18	33	149.5	33	148;151	y	0.21	34	130	34	142;118	y	0.0454248	5.26965	up	ENSG00000108515.17	ENO3	protein_coding	enolase 3 (beta, muscle)
novel_NIR_20133	chr17	50659368	50663681	+	50659368;50661114	50660923;50663681	ES	ENST00000427699.5	novel	0.15	14	78.5	14	94;63	y	0.13	11	71.5	11	70;73	n	0.06	4	64.5	4	86;43	n	0.05	4	75.5	4	82;69	n	0.037184	-7.60263	down	ENSG00000108846.15	ABCC3	protein_coding	ATP-binding cassette, sub-family C (CFTR/MRP), member 3
novel_NIR_20262	chr17	59075714;59076734	59076654;59079754	-	59075714	59079754	cassetteExon	ENST00000393066.7	novel	0.05	4	74	5;3	74	n	0.04	3.5	88	5;2	88	n	0.17	14	67	11;17	67	y	0.16	14	74	11;17	74	y	0.00345424	16.9706	up	ENSG00000108395.13	TRIM37	protein_coding	tripartite motif containing 37
novel_NIR_20265	chr17	59112345	59155131	-	59112345	59154956	A5SS	ENST00000580541.1	novel	0.6	9	6	9	6	y	0.62	16	10	16	10	y	0.48	10	11	10	11	y	0.5	12	12	12	12	y	0.0136061	-8.48528	down	ENSG00000182628.12	SKA2	protein_coding	spindle and kinetochore associated complex subunit 2
novel_NIR_20298	chr17	60073886;60074159	60073962;60076130	-	60073886	60076130	cassetteExon	ENST00000184956.10	novel	0.16	5.5	29	0;11	29	n	0.14	5.5	33	0;11	33	n	0.28	9.5	24	8;11	24	y	0.3	11	26	9;13	26	y	0.0100505	9.89949	up	ENSG00000068097.14	HEATR6	protein_coding	HEAT repeat containing 6
novel_NIR_20353	chr17	63704582	63704820	-	63704582	63706635	A5SS	ENST00000375840.8	novel	0.15	12	69	12	69	y	0.18	19	84	19	84	y	0.08	7	81	7	81	n	0.06	4	67	4	67	n	0.0454248	-5.26965	down	ENSG00000266173.5	STRADA	protein_coding	STE20-related kinase adaptor alpha
novel_NIR_20374	chr17	64493021	64496532	-	64493021	64496407	A5SS	ENST00000539111.6	novel	0.22	12	42	12	42	y	0.26	12	34	12	34	y	0.08	5	56	5	56	n	0.06	4	64	4	64	n	0.037184	-7.60263	down	ENSG00000256525.6	POLG2	protein_coding	polymerase (DNA directed), gamma 2, accessory subunit
novel_NIR_20443	chr17	6624006	6624755	-	6623688	6624755	A3SS	ENST00000572370.5	novel	0.67	4	2	4	2	y	0.73	11	4	11	4	y	0.09	2	21	2	21	n	0	0	10	0	10	n	0.0109973	-12.111	down	ENSG00000198920.9	KIAA0753	protein_coding	KIAA0753
novel_NIR_20446	chr17	6635171	6635898	-	6635171	6640637	A5SS	ENST00000361413.7	novel	0.03	2	58	2	58	n	0.05	3	52	3	52	n	0.17	8	40	8	40	y	0.14	3	18	3	18	n	0.0329611	6.37905	up	ENSG00000198920.9	KIAA0753	protein_coding	KIAA0753
novel_NIR_21083	chr17	78202751;78204900	78204828;78205946	+	78202751	78205946	cassetteExon	ENST00000588800.5	novel	0.24	8.5	27	13;4	27	y	0.26	10	28	15;5	28	y	0.41	16.5	24	18;15	24	y	0.37	11	19	9;13	19	y	0.0491686	6.26099	up	ENSG00000183077.15	AFMID	protein_coding	arylformamidase
novel_NIR_21288	chr17	80260902	80263663	+	80260902	80263574	A3SS	ENST00000508628.6	novel	0.07	4	51	4	51	n	0.1	5	45	5	45	n	0.24	9	28	9	28	y	0.21	16	60	16	60	y	0.0221976	6.59966	up	ENSG00000173821.19	RNF213	protein_coding	ring finger protein 213
novel_NIR_21396	chr17	81869075	81869542	-	81869075	81869741	A5SS	ENST00000581876.5	novel	0	0	3	0	3	n	0.24	5	16	5	16	y	1	5	0	5	0	y	0.86	6	1	6	1	y	0.0453268	5.83051	up	ENSG00000141522.11	ARHGDIA	protein_coding	Rho GDP dissociation inhibitor (GDI) alpha
novel_NIR_21542	chr17	82947122	82956695	-	82946983	82956695	A3SS	ENST00000576599.5	novel	0	0	17	0	17	n	0.05	2	37	2	37	n	0.36	13	23	13	23	y	0.35	9	17	9	17	y	0.0407002	12.9437	up	ENSG00000175711.8	B3GNTL1	protein_coding	UDP-GlcNAc:betaGal beta-1,3-N-acetylglucosaminyltransferase-like 1
novel_NIR_21704	chr18	21403994;21435075	21434947;21439521	+	21403994	21439521	cassetteExon	ENST00000424526.5	novel	0.19	14	61	13;15	61	y	0.25	30	90	25;35	90	y	0.45	30.5	38	31;30	38	y	0.41	26.5	38	19;34	38	y	0.0384207	5.82435	up	ENSG00000141449.14	GREB1L	protein_coding	growth regulation by estrogen in breast cancer-like
novel_NIR_22015	chr18	49490927	49491626	-	49490927	49491532	A5SS&ES	ENST00000579820.2	novel	0.48	13	14	13	14	y	0.54	19	16	19	16	y	0.19	3	13	3	13	y	0.14	2	12	2	12	n	0.0138655	-8.83454	down	ENSG00000177576.10	C18orf32	protein_coding	chromosome 18 open reading frame 32
novel_NIR_22221	chr18	677444	678696	-	677444	677743	A5SS&ES	ENST00000340116.11	novel	0.07	9	118	9	118	n	0.1	19	163	19	163	n	0.19	32	140	32	140	y	0.17	26	129	26	129	y	0.0454248	5.26965	up	ENSG00000132199.18	ENOSF1	protein_coding	enolase superfamily member 1
novel_NIR_22643	chr19	13978086;13979079	13978786;13979447	-	13978086	13979447	cassetteExon	ENST00000254325.8	novel	0.03	0.5	18	0;1	18	n	0.01	0.5	39	0;1	39	n	0.2	6.5	26	2;11	26	y	0.16	6.5	33	0;13	33	n	0.0405833	7.15542	up	ENSG00000132005.8	RFX1	protein_coding	regulatory factor X, 1 (influences HLA class II expression)
novel_NIR_22990	chr19	19532513	19532632	+	19529513	19532632	A5SS	ENST00000514277.5	novel	0.64	7	4	7	4	y	0.68	13	6	13	6	y	0.91	10	1	10	1	y	0.88	7	1	7	1	y	0.0141025	9.4	up	ENSG00000250067.11	YJEFN3	protein_coding	YjeF N-terminal domain containing 3
novel_NIR_23049	chr19	21098311	21116829	+	21098311	21098815	A3SS&ES	ENST00000596053.5	novel	0	0	17	0	17	n	0.09	2	20	2	20	n	0.27	9	24	9	24	y	0.35	7	13	7	13	y	0.049137	4.40141	up	ENSG00000160352.15	ZNF714	protein_coding	zinc finger protein 714
novel_NIR_23188	chr19	29942664	29985223	+	29942664;29971227	29971193;29985223	ES	ENST00000392271.5	novel	0.26	25	71	25	59;83	y	0.27	20	53	20	46;60	y	0.42	36	50	36	36;64	y	0.39	38	58.5	38	49;68	y	0.0468821	8.85438	up	ENSG00000105176.17	URI1	protein_coding	URI1, prefoldin-like chaperone
novel_NIR_23347	chr19	35877825	35878584	+	35877825;35878108	35878082;35878584	ES	ENST00000221891.8	novel	0.25	2	6	2	1;11	y	0.26	6	17	6	8;26	y	0.19	3	13	3	2;24	y	0.18	3	13.5	3	8;19	y	0.0100505	-9.89949	down	ENSG00000105290.11	APLP1	protein_coding	amyloid beta (A4) precursor-like protein 1
novel_NIR_23401	chr19	36327170	36330253	-	36322225	36330253	A3SS	ENST00000590622.5	novel	0.4	10	15	10	15	y	0.34	13	25	13	25	y	0.62	10	6	10	6	y	0.67	20	10	20	10	y	0.0212992	7.04203	up	ENSG00000232677.6	LINC00665	lincRNA	long intergenic non-protein coding RNA 665
novel_NIR_24015	chr19	45406739	45407094	+	45406724	45407094	A5SS	ENST00000589804.1	novel	0.08	1	11	1	11	n	0.12	1	7	1	7	n	0.25	2	6	2	6	y	0.29	5	12	5	12	y	0.0265828	6.01041	up	ENSG00000117877.10	CD3EAP	protein_coding	CD3e molecule, epsilon associated protein
novel_NIR_24116	chr19	46839578	46850134	-	46839578	46850764	A5SS	ENST00000593442.5	novel	0	0	20	0	20	n	0.11	2	17	2	17	n	0.46	11	13	11	13	y	0.52	11	10	11	10	y	0.0378321	6.94336	up	ENSG00000042753.11	AP2S1	protein_coding	adaptor-related protein complex 2, sigma 1 subunit
novel_NIR_24189	chr19	48095604;48096838	48096699;48098139	-	48095604	48098139	cassetteExon	ENST00000599111.5	novel	0.62	5	3	5;5	3	y	0.56	2.5	2	4;1	2	n	0.11	1	8	0;2	8	n	0.2	3	12	0;6	12	n	0.0222268	-8.04315	down	ENSG00000105499.13	PLA2G4C	protein_coding	phospholipase A2, group IVC (cytosolic, calcium-independent)
novel_NIR_24556	chr19	54115797	54118241	+	54115797	54118271	A3SS	ENST00000419967.5	novel	0.06	5	73	5	73	n	0	0	80	0	80	n	0.21	27	104	27	104	y	0.27	33	88	33	88	y	0.0384761	4.94975	up	ENSG00000105618.13	PRPF31	protein_coding	pre-mRNA processing factor 31
novel_NIR_24622	chr19	55544949	55546476	-	55544949	55545499	5pMXE	ENST00000612221.1	novel	0.82	23	5	23	5	y	0.76	26	8	26	8	y	0.5	8	8	8	8	y	0.58	14	10	14	10	y	0.0439076	-5	down	ENSG00000231274.5	SBK3	protein_coding	SH3 domain binding kinase family, member 3
novel_NIR_24626	chr19	55593646;55595734	55595620;55597572	-	55593646	55597572	cassetteExon	ENST00000221665.4	novel	0.38	12	20	11;13	20	y	0.35	12	22	12;12	22	y	0.24	9.5	30	12;7	30	y	0.2	8	32	7;9	32	y	0.033757	-5.8	down	ENSG00000179943.7	FIZ1	protein_coding	FLT3-interacting zinc finger 1
novel_NIR_25210	chr2	108449289	108449633	+	108449280	108449633	A5SS	ENST00000309863.10	novel	0.14	13	79	13	79	n	0.17	12	59	12	59	y	0.02	3	119	3	119	n	0.05	4	80	4	80	n	0.0298575	-5.65685	down	ENSG00000135968.19	GCC2	protein_coding	GRIP and coiled-coil domain containing 2
novel_NIR_26147	chr2	178469785;178473142	178473029;178478279	-	178469785;178477213	178477062;178478279	MXE	ENST00000424785.6	novel	0.04	0.5	11.5	0;1	10;13	n	0	0	11.5	0;0	10;13	n	0.25	1.5	4.5	2;1	3;6	n	0.28	2.5	6.5	3;2	6;7	y	0.0130684	9.8	up	ENSG00000079150.17	FKBP7	protein_coding	FK506 binding protein 7
novel_NIR_26254	chr2	188529195	188569239	+	188529195	188541181	3pMXE	ENST00000410051.5	novel	0.17	6	29	6	29	y	0.16	7	37	7	37	y	0.21	8	30	8	30	y	0.2	6	24	6	24	y	0.0298575	5.65685	up	ENSG00000144366.15	GULP1	protein_coding	GULP, engulfment adaptor PTB domain containing 1
novel_NIR_26299	chr2	190649360;190649982	190649831;190659158	+	190649360	190659158	cassetteExon	ENST00000409581.5	novel	0.18	9.5	42	2;17	42	y	0.15	7.5	42	3;12	42	y	0.33	16	33	19;13	33	y	0.37	15	26	5;25	26	y	0.0217889	7.4	up	ENSG00000138386.16	NAB1	protein_coding	NGFI-A binding protein 1 (EGR1 binding protein 1)
novel_NIR_26302	chr2	190649982;190653780	190653727;190655977	+	190649982	190655977	cassetteExon	ENST00000337386.9	novel	0.78	14.5	4	15;14	4	y	0.9	28	3	19;37	3	y	0.5	11	11	12;10	11	y	0.38	8	13	8;8	13	y	0.0421737	-4.71405	down	ENSG00000138386.16	NAB1	protein_coding	NGFI-A binding protein 1 (EGR1 binding protein 1)
novel_NIR_26690	chr2	218285938	218292466	-	218282181	218292466	A3SS	ENST00000258412.7	novel	0.04	1	26	1	26	n	0.05	3	52	3	52	n	0.17	6	29	6	29	y	0.19	11	48	11	48	y	0.0189814	12.0748	up	ENSG00000135926.12	TMBIM1	protein_coding	transmembrane BAX inhibitor motif containing 1
novel_NIR_26773	chr2	219300424	219303677	+	219300424	219303997	A3SS	ENST00000417355.1	novel	0.67	4	2	4	2	n	0.71	20	8	20	8	y	1	4	0	4	0	y	0.94	15	1	15	1	y	0.0235993	7.7658	up	ENSG00000230432.1	AC114803.3	antisense		--
novel_NIR_26900	chr2	231331897	231355798	+	231331897;231345090	231344975;231355798	ES	ENST00000614261.4	novel	0.11	2	15.5	2	20;11	n	0.1	3	28	3	48;8	n	0.15	3	17	3	31;3	y	0.16	9	47	9	76;18	y	0.0194193	7.07107	up	ENSG00000135931.17	ARMC9	protein_coding	armadillo repeat containing 9
novel_NIR_26911	chr2	232163632;232198776	232198527;232210326	+	232163632	232210326	cassetteExon	ENST00000273009.10	novel	0.14	5.5	35	7;4	35	n	0.15	6.5	36	8;5	36	y	0.09	4.5	44	2;7	44	n	0.08	2	23	0;4	23	n	0.0136061	-8.48528	down	ENSG00000144535.19	DIS3L2	protein_coding	DIS3 like 3'-5' exoribonuclease 2
novel_NIR_27433	chr2	30476635	30525587	+	30459722	30525587	A5SS	ENST00000319406.8	novel	0.29	2	5	2	5	y	0.33	3	6	3	6	y	0.13	2	13	2	13	n	0.08	1	12	1	12	n	0.0264129	-6.40312	down	ENSG00000172954.13	LCLAT1	protein_coding	lysocardiolipin acyltransferase 1
novel_NIR_28066	chr2	73946888	73958146	+	73946906	73958146	A5SS	ENST00000348222.3	novel	0.06	8	116	8	116	n	0.07	10	140	10	140	n	0.15	27	152	27	152	y	0.13	23	150	23	150	n	0.0445338	6.7082	up	ENSG00000114956.19	DGUOK	protein_coding	deoxyguanosine kinase
novel_NIR_28152	chr2	74507147	74507358	-	74507147	74507576	A5SS	ENST00000233630.10	novel	0.12	13	97	13	97	n	0.14	18	108	18	108	n	0.39	44	68	44	68	y	0.34	30	58	30	58	y	0.0402871	8.72768	up	ENSG00000115289.12	PCGF1	protein_coding	polycomb group ring finger 1
novel_NIR_28309	chr2	87480362	87521207	+	87472885	87521207	A5SS	ENST00000419680.6	novel	0.93	13	1	13	1	y	0.97	29	1	29	1	y	0.58	14	10	14	10	y	0.55	24	20	24	20	n	0.00569588	-15.4	down	ENSG00000222041.10	LINC00152	lincRNA	long intergenic non-protein coding RNA 152
novel_NIR_28662	chr20	21205530	21214535	+	21205584	21214535	A5SS	ENST00000619574.4	novel	0.57	28	21	28	21	y	0.5	17	17	17	17	y	0.29	9	22	9	22	y	0.34	10	19	10	19	y	0.0443021	-5.1149	down	ENSG00000088970.15	KIZ	protein_coding	kizuna centrosomal protein
novel_NIR_28888	chr20	35263507	35263791	+	35254754	35263791	A5SS	ENST00000246186.7	novel	0.61	11	7	11	7	y	0.73	8	3	8	3	y	0	0	7	0	7	n	0.14	1	6	1	6	n	0.0241628	-6.50791	down	ENSG00000125966.9	MMP24	protein_coding	matrix metallopeptidase 24 (membrane-inserted)
novel_NIR_28944	chr20	35602564	35602689	-	35602607	35602689	A3SS	ENST00000615531.4	novel	0.62	5	3	5	3	y	0.6	6	4	6	4	y	0.33	1	2	1	2	n	0.38	3	5	3	5	y	0.0362355	-9.47046	down	ENSG00000088340.15	FER1L4	unitary_pseudogene	fer-1-like family member 4, pseudogene (functional)
novel_NIR_29162	chr20	3934201;3934920	3934852;3934994	-	3934201	3934994	cassetteExon	ENST00000336095.10	novel	0.18	19.5	86	20;19	86	y	0.15	18.5	106	17;20	106	y	0.05	9	164	9;9	164	n	0.07	9	126	14;4	126	n	0.0384207	-5.82435	down	ENSG00000101236.16	RNF24	protein_coding	ring finger protein 24
novel_NIR_29416	chr20	4822403	4823315	-	4822403	4823557	A5SS	ENST00000379400.7	novel	0.32	13	28	13	28	y	0.35	21	39	21	39	y	0.17	10	48	10	48	y	0.18	10	45	10	45	y	0.0398973	-10.1193	down	ENSG00000101265.15	RASSF2	protein_coding	Ras association (RalGDS/AF-6) domain family member 2
novel_NIR_29555	chr20	53583168	53594107	-	53583168	53593756	5pMXE	ENST00000371471.6	novel	0.23	9	30	9	30	y	0.24	17	55	17	55	y	0.19	14	59	14	59	y	0.18	17	79	17	79	y	0.0194193	-7.07107	down	ENSG00000171940.13	ZNF217	protein_coding	zinc finger protein 217
novel_NIR_29662	chr20	59901810	59911750	-	59901810;59907424	59907364;59911750	ES	ENST00000357552.7	novel	0.07	1	14	1	17;11	n	0	0	3	0	4;2	n	0.88	7	1	7	2;0	y	1	2	0	2	0;0	y	0.0126915	13.0287	up	ENSG00000196074.12	SYCP2	protein_coding	synaptonemal complex protein 2
novel_NIR_29760	chr20	63661496	63661762	+	63661496	63661850	A3SS	ENST00000370018.7	novel	0.11	7	56	7	56	n	0.12	8	60	8	60	n	0.17	10	50	10	50	y	0.18	11	49	11	49	y	0.0136061	8.48528	up	ENSG00000258366.7	RTEL1	protein_coding	regulator of telomere elongation helicase 1
novel_NIR_30006	chr21	33546379	33550220	+	33546379	33557156	A3SS	ENST00000381692.6	novel	0	0	6	0	6	n	0.23	3	10	3	10	y	1	3	0	3	0	y	0.77	20	6	20	6	y	0.0418319	4.73454	up	ENSG00000159140.17	SON	protein_coding	SON DNA binding protein
novel_NIR_30077	chr21	36446007	36451670	+	36446007	36460290	A3SS	ENST00000454980.1	novel	0	0	4	0	4	n	0.13	3	20	3	20	n	0.62	5	3	5	3	y	0.73	8	3	8	3	y	0.0203509	7.16409	up	ENSG00000233818.1	AP000695.4	antisense		--
novel_NIR_30139	chr21	37073473	37108392	+	37096643	37108392	A5SS&ES	ENST00000355666.5	novel	0.21	24	90	24	90	y	0.2	21	85	21	85	y	0.17	16	76	16	76	y	0.16	19	97	19	97	y	0.0298575	-5.65685	down	ENSG00000182670.13	TTC3	protein_coding	tetratricopeptide repeat domain 3
novel_NIR_30147	chr21	37156906;37158203	37158131;37159699	+	37156906	37159699	cassetteExon	ENST00000355666.5	novel	0.16	40	211	21;59	211	y	0.18	42.5	192	39;46	192	y	0.25	62	183	49;75	183	y	0.24	51.5	159	34;69	159	y	0.0445338	6.7082	up	ENSG00000182670.13	TTC3	protein_coding	tetratricopeptide repeat domain 3
novel_NIR_30622	chr21	8399747	8405960	+	8384098	8405960	A5SS	ENST00000623860.2	novel	0.05	2	37	2	37	n	0	0	52	0	52	n	0.2	10	39	10	39	y	0.23	8	27	8	27	y	0.0366694	6.51695	up	ENSG00000280441.2	CH507-528H12.1	lincRNA		--
novel_NIR_30655	chr22	15785057;15788931	15788552;15815476	+	15785057;15791152	15791017;15815476	MXE	ENST00000447898.5	novel	0.08	7	77.5	12;2	4;151	n	0.07	6.5	86	10;3	0;172	n	0.17	14.5	71.5	16;13	0;143	y	0.19	12	52.5	16;8	0;105	y	0.0273751	9.39149	up	ENSG00000206195.10	DUXAP8	processed_transcript	double homeobox A pseudogene 8
novel_NIR_31264	chr22	31626016;31628981	31628853;31630804	-	31626016	31630804	cassetteExon	ENST00000397500.5	novel	0.45	2.5	3	2;3	3	y	0.43	1.5	2	3;0	2	n	0.75	3	1	4;2	1	y	0.71	2.5	1	4;1	1	n	0.0170999	12.9692	up	ENSG00000241878.9	PISD	protein_coding	phosphatidylserine decarboxylase
novel_NIR_31354	chr22	37059438	37061539	+	37059438;37060922	37060823;37061539	ES	ENST00000402077.7	novel	0.09	2	19.5	2	31;8	n	0	0	10	0	15;5	n	0.44	7	9	7	18;0	y	0.4	6	9	6	13;5	y	0.0429341	7.6151	up	ENSG00000100379.17	KCTD17	protein_coding	potassium channel tetramerization domain containing 17
novel_NIR_31417	chr22	37907478	37911952	+	37906568	37911952	A5SS	ENST00000215957.10	novel	0.14	6	38	6	38	n	0.07	2	27	2	27	n	0.34	12	23	12	23	y	0.42	17	23	17	23	y	0.0366988	5.17396	up	ENSG00000100139.13	MICALL1	protein_coding	MICAL-like 1
novel_NIR_31510	chr22	38361560	38369986	-	38361560	38380370	A5SS	ENST00000400206.6	novel	0.4	6	9	6	9	y	0.5	1	1	1	1	n	0	0	10	0	10	n	0.06	1	15	1	15	n	0.0312522	-7.20294	down	ENSG00000213923.10	CSNK1E	protein_coding	casein kinase 1, epsilon
novel_NIR_31765	chr22	46346544	46350350	+	46346544	46350291	A3SS	ENST00000290846.8	novel	0.16	17	92	17	92	y	0.15	25	146	25	146	y	0.06	12	190	12	190	n	0.05	9	189	9	189	n	0.00496281	-14.1421	down	ENSG00000100416.12	TRMU	protein_coding	tRNA 5-methylaminomethyl-2-thiouridylate methyltransferase
novel_NIR_31769	chr22	46530500	46533627	-	46464345	46533627	A3SS	ENST00000262738.7	novel	0.07	3	41	3	41	n	0.1	5	44	5	44	n	0.17	8	38	8	38	y	0.2	14	55	14	55	y	0.0421737	4.71405	up	ENSG00000075275.16	CELSR1	protein_coding	cadherin, EGF LAG seven-pass G-type receptor 1
novel_NIR_31862	chr22	50389111	50393893	+	50389111;50392015	50391867;50393893	ES	ENST00000216061.9	novel	0.95	10	0.5	10	0;1	y	0.97	14	0.5	14	0;1	y	0.5	7	7	7	0;14	y	0.46	3	3.5	3	0;7	y	0.00817373	-21.4663	down	ENSG00000100239.15	PPP6R2	protein_coding	protein phosphatase 6, regulatory subunit 2
novel_NIR_32074	chr3	113506605	113515080	-	113506605	113514897	A5SS	ENST00000295872.8	novel	0.66	47	24	47	24	y	0.55	32	26	32	26	y	0.22	18	64	18	64	y	0.31	22	48	22	48	y	0.0441976	-4.78446	down	ENSG00000163611.11	SPICE1	protein_coding	spindle and centriole associated protein 1
novel_NIR_32171	chr3	119477448;119478474	119478334;119480051	+	119477448	119480051	cassetteExon	ENST00000295588.8	novel	0.03	1	29	2;0	29	n	0	0	37	0;0	37	n	0.16	6	32	4;8	32	y	0.17	6	29	12;0	29	n	0.0431348	9.48683	up	ENSG00000163389.10	POGLUT1	protein_coding	protein O-glucosyltransferase 1
novel_NIR_32385	chr3	129397140	129397411	-	129397140	129399008	A5SS	ENST00000510078.5	novel	0.26	9	25	9	25	y	0.29	20	49	20	49	n	0.09	3	32	3	32	n	0.1	6	57	6	57	n	0.0345951	-11.3842	down	ENSG00000251474.6	RPL32P3	transcribed_unprocessed_pseudogene	ribosomal protein L32 pseudogene 3
novel_NIR_32626	chr3	141738509;141742907	141742644;141743509	+	141738509	141743509	cassetteExon	ENST00000393000.3	novel	0.36	15.5	28	2;29	28	y	0.32	19	41	0;38	41	n	0.2	9	37	2;16	37	y	0.23	16	53	2;30	53	y	0.0439076	-5	down	ENSG00000114125.13	RNF7	protein_coding	ring finger protein 7
novel_NIR_32818	chr3	156675778	156677657	+	156675391	156677657	A5SS	ENST00000461166.5	novel	0.33	3	6	3	6	y	0.26	5	14	5	14	y	0.57	13	10	13	10	y	0.6	6	4	6	4	y	0.0447203	7.61577	up	ENSG00000163659.12	TIPARP	protein_coding	TCDD-inducible poly(ADP-ribose) polymerase
novel_NIR_33371	chr3	196939432	196942370	-	196939432	196942160	A5SS	ENST00000447325.5	novel	0.86	55	9	55	9	y	0.9	75	8	75	8	y	0.75	55	18	55	18	y	0.73	55	20	55	20	y	0.0491686	-6.26099	down	ENSG00000114503.10	NCBP2	protein_coding	nuclear cap binding protein subunit 2, 20kDa
novel_NIR_33641	chr3	40529575	40530209	+	40529445	40530209	A5SS	ENST00000403205.6	novel	0.29	9	22	9	22	y	0.26	16	45	16	45	n	0.15	6	33	6	33	n	0.13	7	48	7	48	n	0.025109	-7.48845	down	ENSG00000172888.11	ZNF621	protein_coding	zinc finger protein 621
novel_NIR_33889	chr3	48466309	48466778	+	48466309	48466630	A3SS	ENST00000296443.10	novel	0.13	8	52	8	52	n	0.15	8	46	8	46	y	0	0	44	0	44	n	0.03	2	58	2	58	n	0.0286201	-6.93375	down	ENSG00000213689.9	TREX1	protein_coding	three prime repair exonuclease 1
novel_NIR_33937	chr3	48694240;48694807	48694694;48695090	-	48694240	48695090	cassetteExon	ENST00000340879.8	novel	0.25	24	72	48;0	72	n	0.26	17	48	34;0	48	n	0.31	22.5	51	45;0	51	n	0.32	26.5	57	48;5	57	y	0.0136061	8.48528	up	ENSG00000068745.14	IP6K2	protein_coding	inositol hexakisphosphate kinase 2
novel_NIR_33970	chr3	48712006	48715315	-	48695421	48715315	A3SS	ENST00000431721.6	novel	0	0	7	0	7	n	0.18	2	9	2	9	y	0.6	3	2	3	2	n	0.73	8	3	8	3	y	0.0428586	5.17934	up	ENSG00000068745.14	IP6K2	protein_coding	inositol hexakisphosphate kinase 2
novel_NIR_34497	chr3	75432870	75434918	-	75432870	75435015	A5SS	ENST00000477247.6	novel	0.5	14	14	14	14	y	0.53	9	8	9	8	y	0.72	23	9	23	9	y	0.69	33	15	33	15	y	0.012237	8.95669	up	ENSG00000244026.6	FAM86DP	transcribed_unprocessed_pseudogene	family with sequence similarity 86, member D, pseudogene
novel_NIR_34862	chr4	120853540	120856459	-	120853540	120907474	A5SS	ENST00000264808.7	novel	0	0	12	0	12	n	0.05	1	20	1	20	n	0.19	6	26	6	26	n	0.24	6	19	6	19	y	0.0329255	5.37401	up	ENSG00000138738.10	PRDM5	protein_coding	PR domain containing 5
novel_NIR_35279	chr4	17805225;17809692	17809537;17810447	-	17805225	17810447	cassetteExon	ENST00000382247.5	novel	0.15	12	70	5;19	70	y	0.16	16	82	11;21	82	y	0.22	23.5	83	0;47	83	n	0.23	19	63	12;26	63	y	0.0100505	9.89949	up	ENSG00000163257.10	DCAF16	protein_coding	DDB1 and CUL4 associated factor 16
novel_NIR_35370	chr4	20700617	20704466	+	20700787	20704466	A5SS	ENST00000503585.5	novel	0.13	4	26	4	26	n	0.16	9	46	9	46	y	0.02	1	58	1	58	n	0	0	36	0	36	n	0.025109	-7.48845	down	ENSG00000163138.18	PACRGL	protein_coding	PARK2 co-regulated-like
novel_NIR_35436	chr4	26320815	26362446	+	26321048	26362446	A5SS	ENST00000355476.7	novel	0.26	11	31	11	31	y	0.22	10	36	10	36	y	0.1	8	72	8	72	n	0.06	4	67	4	67	n	0.0298575	-5.65685	down	ENSG00000168214.20	RBPJ	protein_coding	recombination signal binding protein for immunoglobulin kappa J region
novel_NIR_35535	chr4	38054338;38060658	38060620;38089932	+	38054338	38089932	cassetteExon	ENST00000508802.5	novel	0.17	9	44	8;10	44	y	0.19	12	50	12;12	50	y	0.02	1.5	88	0;3	88	n	0.06	5	76	6;4	76	n	0.0491686	-6.26099	down	ENSG00000065882.15	TBC1D1	protein_coding	TBC1 (tre-2/USP6, BUB2, cdc16) domain family, member 1
novel_NIR_35656	chr4	4542426	4544738	+	4542475	4544738	A5SS	ENST00000610009.5	novel	0.62	5	3	5	3	y	0.75	6	2	6	2	y	0.15	4	22	4	22	y	0	0	2	0	2	n	0.0267145	-6.14627	down	ENSG00000247708.7	STX18-AS1	antisense	STX18 antisense RNA 1 (head to head)
novel_NIR_35827	chr4	7022594	7025004	+	7014557	7025004	A5SS	ENST00000448507.5	novel	0.07	10	142	10	142	n	0.08	14	156	14	156	n	0.14	30	192	30	192	n	0.16	32	170	32	170	y	0.0445338	6.7082	up	ENSG00000132405.18	TBC1D14	protein_coding	TBC1 domain family, member 14
novel_NIR_36076	chr4	89681684	89685413	+	89681684	89684445	A3SS	ENST00000612706.1	novel	0.21	8	30	8	30	y	0.18	8	37	8	37	y	0.4	22	33	22	33	y	0.38	6	10	6	10	y	0.0133654	10.8167	up	ENSG00000251095.6	RP11-115D19.1	antisense		--
novel_NIR_36164	chr4	99923185	99927717	-	99923185	99930450	A5SS	ENST00000442697.6	novel	0	0	52	0	52	n	0.04	2	44	2	44	n	0.17	7	35	7	35	y	0.13	5	34	5	34	n	0.044221	4.59619	up	ENSG00000164031.16	DNAJB14	protein_coding	DnaJ (Hsp40) homolog, subfamily B, member 14
novel_NIR_36279	chr5	119104276	119105180	+	119102006	119105180	A5SS	ENST00000539542.5	novel	0	0	47	0	47	n	0.04	2	53	2	53	n	0.15	14	77	14	77	y	0.19	16	68	16	68	y	0.0337651	5.3033	up	ENSG00000172869.14	DMXL1	protein_coding	Dmx-like 1
novel_NIR_36518	chr5	134855162	134857357	+	134855327	134857357	A5SS	ENST00000504727.1	novel	0.18	10	46	10	46	y	0.19	14	58	14	58	y	0.4	32	48	32	48	y	0.44	14	18	14	18	y	0.0423266	11.3992	up	ENSG00000181904.8	C5orf24	protein_coding	chromosome 5 open reading frame 24
novel_NIR_36599	chr5	139279129	139282739	+	139279129	139307239	A3SS	ENST00000509990.5	novel	0.68	42	20	42	20	y	0.75	46	15	46	15	y	0.37	22	37	22	37	y	0.47	28	31	28	31	y	0.0498292	-4.83347	down	ENSG00000280987.2	MATR3	protein_coding	matrin 3
novel_NIR_36601	chr5	139279129	139282739	+	139279129;139280058	139279935;139282739	ES	ENST00000507197.5	novel	0.3	42	100	42	140;60	y	0.28	46	117	46	136;98	y	0.18	22	100.5	22	126;75	y	0.2	28	114.5	28	140;89	y	0.0194193	-7.07107	down	ENSG00000281398.2	SNHG4	processed_transcript	small nucleolar RNA host gene 4
novel_NIR_36809	chr5	148270142;148270999	148270937;148274344	+	148270142;148270912	148270764;148274344	MXE	ENST00000511106.5	novel	0.27	23	63	33;13	83;43	y	0.26	18	51.5	29;7	69;34	y	0.19	17.5	73.5	31;4	91;56	y	0.18	14.5	66.5	25;4	76;57	y	0.00772212	-11.3137	down	ENSG00000214510.9	SPINK13	protein_coding	serine peptidase inhibitor, Kazal type 13 (putative)
novel_NIR_37267	chr5	177603364	177604179	+	177600260	177604179	A5SS	ENST00000029410.9	novel	0.07	1	14	1	14	n	0.05	1	21	1	21	n	0.32	7	15	7	15	n	0.3	7	16	7	16	y	0.00318472	17.6777	up	ENSG00000027847.13	B4GALT7	protein_coding	xylosylprotein beta 1,4-galactosyltransferase, polypeptide 7
novel_NIR_37339	chr5	180793097	180808502	-	180793097	180802680	5pMXE	ENST00000307826.4	novel	0.06	2	31	2	31	n	0.05	2	37	2	37	n	0.18	8	36	8	36	y	0.17	7	34	7	34	y	0.00345424	16.9706	up	ENSG00000131446.15	MGAT1	protein_coding	mannosyl (alpha-1,3-)-glycoprotein beta-1,2-N-acetylglucosaminyltransferase
novel_NIR_37572	chr5	376502	376610	+	353911	376610	A5SS	ENST00000505113.5	novel	0.35	42	79	42	79	y	0.37	26	44	26	44	y	0.17	17	83	17	83	y	0.15	24	131	24	131	y	0.00496281	-14.1421	down	ENSG00000063438.16	AHRR	protein_coding	aryl-hydrocarbon receptor repressor
novel_NIR_37592	chr5	38530666;38595033	38594829;38595261	-	38530666	38595261	cassetteExon	ENST00000263409.8	novel	0.2	1	4	2;0	4	n	0	0	22	0;0	22	n	1	1	0	2;0	0	n	0.8	4	1	2;6	1	y	0.0298575	5.65685	up	ENSG00000113594.9	LIFR	protein_coding	leukemia inhibitory factor receptor alpha
novel_NIR_37776	chr5	55959671	55960402	-	55956235	55960402	A3SS	ENST00000381287.8	novel	0.93	26	2	26	2	y	1	27	0	27	0	y	0.68	13	6	13	6	y	0.74	25	9	25	9	y	0.0327893	-5.53173	down	ENSG00000134352.19	IL6ST	protein_coding	interleukin 6 signal transducer
novel_NIR_37890	chr5	647916;648405	648100;652988	+	647916	652988	cassetteExon	ENST00000264935.5	novel	0.15	62.5	363	12;113	363	y	0.17	79	376	126;32	376	y	0.23	106.5	363	161;52	363	y	0.25	137	411	195;79	411	y	0.0298575	5.65685	up	ENSG00000112877.7	CEP72	protein_coding	centrosomal protein 72kDa
novel_NIR_38213	chr5	82303832;82304105	82304028;82304615	+	82303832	82304615	cassetteExon	ENST00000380167.8	novel	0.3	3	7	3;3	7	y	0.28	5	13	5;5	13	y	0.2	3.5	14	3;4	14	y	0.18	2	9	1;3	9	n	0.0194193	-7.07107	down	ENSG00000205464.11	ATP6AP1L	protein_coding	ATPase, H+ transporting, lysosomal accessory protein 1-like
novel_NIR_38255	chr5	88228528	88231719	-	88228528	88268721	A5SS	ENST00000506536.5	novel	0	0	27	0	27	n	0.09	2	21	2	21	n	0.42	5	7	5	7	y	0.36	5	9	5	9	y	0.0329611	6.37905	up	ENSG00000164180.13	TMEM161B	protein_coding	transmembrane protein 161B
novel_NIR_38337	chr5	94309778	94384368	-	94154124	94384368	A3SS	ENST00000513200.7	novel	0.55	6	5	6	5	y	0.6	6	4	6	4	y	0	0	22	0	22	n	0.11	2	17	2	17	n	0.035337	-8.6071	down	ENSG00000185261.13	KIAA0825	protein_coding	KIAA0825
novel_NIR_39275	chr6	169668776	169670569	-	169668185	169670569	A3SS	ENST00000448612.5	novel	0.33	3	6	3	6	y	0.32	9	19	9	19	y	0.56	20	16	20	16	y	0.57	12	9	12	9	n	0.000866927	33.9411	up	ENSG00000184465.15	WDR27	protein_coding	WD repeat domain 27
novel_NIR_39306	chr6	17787875	17794572	-	17787875;17794395	17794249;17794572	ES	ENST00000378814.9	novel	0.19	9	37.5	9	11;64	y	0.23	16	54.5	16	18;91	y	0.38	24	40	24	22;58	y	0.34	30	59	30	34;84	y	0.0337651	5.3033	up	ENSG00000137177.18	KIF13A	protein_coding	kinesin family member 13A
novel_NIR_39607	chr6	30326092	30326354	-	30296237	30326354	A3SS	ENST00000438412.5	novel	0.14	12	73	12	73	n	0.17	13	62	13	62	y	0.32	30	64	30	64	y	0.29	25	60	25	60	y	0.0194193	7.07107	up	ENSG00000231074.8	HCG18	antisense	HLA complex group 18 (non-protein coding)
novel_NIR_39852	chr6	33272122	33272635	+	33272122	33272587	A3SS	ENST00000474973.5	novel	0.78	253	70	253	70	y	0.85	340	61	340	61	y	0.01	1	88	1	88	n	0.04	3	64	3	64	n	0.0116076	-20.7464	down	ENSG00000231500.6	RPS18	protein_coding	ribosomal protein S18
novel_NIR_40135	chr6	43438013;43438390	43438271;43438624	+	43438013	43438624	cassetteExon	ENST00000372530.8	novel	0.02	1	64	0;2	64	n	0.04	2	55	2;2	55	n	0.15	5	28	6;4	28	y	0.12	9	66	10;8	66	n	0.0384207	5.82435	up	ENSG00000124574.14	ABCC10	protein_coding	ATP-binding cassette, sub-family C (CFTR/MRP), member 10
novel_NIR_40175	chr6	44219782	44221586	+	44219782	44227260	A3SS	ENST00000393844.5	novel	0.33	9	18	9	18	y	0.27	4	11	4	11	y	0	0	24	0	24	n	0.04	1	22	1	22	n	0.0235993	-7.7658	down	ENSG00000112759.16	SLC29A1	protein_coding	solute carrier family 29 (equilibrative nucleoside transporter), member 1
novel_NIR_40180	chr6	44219782	44226061	+	44223641	44226061	5pMXE	ENST00000371740.9	novel	0.44	33	42	33	42	y	0.47	30	34	30	34	y	0.07	7	93	7	93	n	0.12	14	102	14	102	n	0.0130877	-12.3479	down	ENSG00000112759.16	SLC29A1	protein_coding	solute carrier family 29 (equilibrative nucleoside transporter), member 1
novel_NIR_40232	chr6	52452837	52452995	+	52452837	52454095	A3SS	ENST00000371068.9	novel	0.03	1	28	1	28	n	0	0	33	0	33	n	0.13	3	20	3	20	n	0.15	4	23	4	23	y	0.0286201	6.93375	up	ENSG00000096093.14	EFHC1	protein_coding	EF-hand domain (C-terminal) containing 1
novel_NIR_40304	chr6	63680161	63691737	+	63680161	63684129	3pMXE	ENST00000509330.5	novel	0.06	8	124	8	124	n	0.07	11	141	11	141	n	0.16	25	132	25	132	y	0.18	31	140	31	140	y	0.0273751	9.39149	up	ENSG00000118482.11	PHF3	protein_coding	PHD finger protein 3
novel_NIR_40305	chr6	63680161	63691737	+	63680161;63685911	63684129;63691737	ES	ENST00000262043.7	novel	0.07	8	114.5	8	124;105	n	0.08	11	132.5	11	141;124	n	0.19	25	105.5	25	132;79	y	0.2	31	123.5	31	140;107	y	0.00345424	16.9706	up	ENSG00000118482.11	PHF3	protein_coding	PHD finger protein 3
novel_NIR_40644	chr7	100631052	100631714	-	100631052	100633001	A5SS	ENST00000431692.5	novel	0.05	4	82	4	82	n	0.07	5	69	5	69	n	0.21	18	68	18	68	y	0.2	16	65	16	65	n	0.0170999	12.9692	up	ENSG00000106327.12	TFR2	protein_coding	transferrin receptor 2
novel_NIR_40878	chr7	111739477	111741148	-	111739477	111741094	A5SS	ENST00000428084.5	novel	0.04	2	44	2	44	n	0.06	3	49	3	49	n	0.19	16	67	16	67	y	0.2	10	41	10	41	y	0.0170999	12.9692	up	ENSG00000128512.19	DOCK4	protein_coding	dedicator of cytokinesis 4
novel_NIR_40894	chr7	1127386	1138199	-	1127386	1138218	A5SS	ENST00000397100.6	novel	0.77	20	6	20	6	y	0.81	22	5	22	5	y	0.24	4	13	4	13	y	0.33	15	30	15	30	y	0.0286162	-10.255	down	ENSG00000146540.14	C7orf50	protein_coding	chromosome 7 open reading frame 50
novel_NIR_41918	chr7	30498938	30504569	-	30500681	30504569	A3SS&ES	ENST00000005374.10	novel	0.21	70	256	70	256	y	0.22	85	297	85	297	y	0.17	74	362	74	362	y	0.16	73	372	73	372	y	0.0194193	-7.07107	down	ENSG00000006625.17	GGCT	protein_coding	gamma-glutamylcyclotransferase
novel_NIR_42249	chr7	50448289	50449579	-	50448289	50449563	A5SS	ENST00000395556.6	novel	0.39	16	25	16	25	y	0.44	19	24	19	24	y	0.21	7	26	7	26	y	0.16	8	41	8	41	y	0.0228236	-6.50538	down	ENSG00000132436.11	FIGNL1	protein_coding	fidgetin-like 1
novel_NIR_42250	chr7	50448289	50449579	-	50448289	50450301	A5SS	ENST00000615084.4	novel	0.64	16	9	16	9	y	0.61	19	12	19	12	y	0.3	7	16	7	16	y	0.26	8	23	8	23	y	0.00697187	-13.8	down	ENSG00000132436.11	FIGNL1	protein_coding	fidgetin-like 1
novel_NIR_42368	chr7	56073111	56076834	+	56073111	56078102	A3SS	ENST00000395435.6	novel	0.57	21	16	21	16	y	0.5	13	13	13	13	n	0.31	10	22	10	22	y	0.23	7	24	7	24	y	0.0393173	-4.98582	down	ENSG00000129103.17	SUMF2	protein_coding	sulfatase modifying factor 2
novel_NIR_42440	chr7	64820323	64831451	+	64815044	64831451	A5SS	ENST00000440155.6	novel	0.1	2	19	2	19	n	0.06	1	16	1	16	n	0.21	5	19	5	19	y	0.24	7	22	7	22	y	0.033757	5.8	up	ENSG00000197008.9	ZNF138	protein_coding	zinc finger protein 138
novel_NIR_42516	chr7	66423878	66427949	-	66411702	66427949	A3SS	ENST00000442578.5	novel	0.25	2	6	2	6	y	0.27	6	16	6	16	y	0.38	3	5	3	5	y	0.36	5	9	5	9	n	0.0161301	7.77817	up	ENSG00000230189.6	GS1-124K5.2	transcribed_unprocessed_pseudogene		--
novel_NIR_42725	chr7	75414798	75414885	+	75410460	75414885	A5SS	ENST00000422386.5	novel	0.09	3	29	3	29	n	0.14	6	36	6	36	n	0.55	23	19	23	19	y	0.5	11	11	11	11	y	0.00735412	11.5966	up	ENSG00000223705.9	NSUN5P1	transcribed_unprocessed_pseudogene	NOP2/Sun domain family, member 5 pseudogene 1
novel_NIR_42810	chr7	76551522;76621159	76621116;76625921	+	76551522	76625921	cassetteExon	ENST00000418663.5	novel	0.1	1	9	2;0	9	n	0.12	3	21	2;4	21	n	0.17	4	19	5;3	19	y	0.19	5.5	23	11;0	23	n	0.0384761	4.94975	up	ENSG00000205485.13	AC004980.7	transcribed_unprocessed_pseudogene		--
novel_NIR_42901	chr7	87219718	87220524	-	87219718	87220361	A5SS	ENST00000433078.5	novel	0.17	7	34	7	34	y	0.22	14	50	14	50	y	0	0	24	0	24	n	0.04	1	27	1	27	n	0.0353057	-5.46608	down	ENSG00000135185.11	TMEM243	protein_coding	transmembrane protein 243, mitochondrial
novel_NIR_43144	chr7	99563266	99563863	+	99560695	99563863	A5SS	ENST00000357864.6	novel	0.09	1	10	1	10	n	0	0	13	0	13	n	0.56	15	12	15	12	y	0.48	13	14	13	14	y	0.016315	7.88932	up	ENSG00000197343.10	ZNF655	protein_coding	zinc finger protein 655
novel_NIR_43163	chr7	99909660;99917885	99917772;99919009	-	99909660	99919009	cassetteExon	ENST00000349062.6	novel	0.19	5	22	0;10	22	n	0.16	5	27	4;6	27	y	0.02	0.5	23	0;1	23	n	0.05	1.5	29	0;3	29	n	0.0221976	-6.59966	down	ENSG00000146833.15	TRIM4	protein_coding	tripartite motif containing 4
novel_NIR_43211	chr8	102232304	102238441	-	102232304	102238559	A5SS	ENST00000621845.1	novel	0.15	2	11	2	11	y	0	0	11	0	11	n	0.75	6	2	6	2	y	1	6	0	6	0	y	0.0481499	5.48795	up	ENSG00000048392.11	RRM2B	protein_coding	ribonucleotide reductase M2 B (TP53 inducible)
novel_NIR_43478	chr8	127689423	127692909	-	127689423	127691790	A5SS&ES	ENST00000502463.7	novel	0.33	1	2	1	2	n	0.29	5	12	5	12	y	0.67	4	2	4	2	y	0.6	3	2	3	2	y	0.0281207	8.06226	up	ENSG00000249375.7	CASC11	lincRNA	cancer susceptibility candidate 11 (non-protein coding)
novel_NIR_43517	chr8	127939676	127989162	+	127939676;127984204	127983904;127989162	ES	ENST00000513868.6	novel	0.38	21	34.5	21	33;36	y	0.36	28	50.5	28	26;75	y	0.5	34	34.5	34	32;37	y	0.52	33	30.5	33	16;45	y	0.0100505	9.89949	up	ENSG00000249859.7	PVT1	lincRNA	Pvt1 oncogene (non-protein coding)
novel_NIR_43653	chr8	140890769	140925562	-	140890769	140984078	A5SS	ENST00000521059.5	novel	0.33	3	6	3	6	y	0.48	12	13	12	13	y	0.86	12	2	12	2	y	1	17	0	17	0	y	0.0364857	5.11739	up	ENSG00000169398.19	PTK2	protein_coding	protein tyrosine kinase 2
novel_NIR_43691	chr8	141160787	141165186	+	141160787;141163429	141163333;141165186	ES	ENST00000262585.6	novel	0.25	11	33.5	11	29;38	y	0.31	15	33	15	34;32	y	0.05	3	55	3	36;74	n	0	0	33	0	21;45	n	0.0245447	-6.52988	down	ENSG00000105339.10	DENND3	protein_coding	DENN/MADD domain containing 3
novel_NIR_43793	chr8	143567888;143568261	143568124;143569441	-	143567888;143568719	143568552;143569441	MXE	ENST00000533679.5	novel	0.3	9	21	3;15	12;30	y	0.28	5	13	6;4	6;20	y	0.88	11	1.5	12;10	3;0	y	0.83	12.5	2.5	8;17	5;0	y	0.0128269	20.9836	up	ENSG00000204839.8	MROH6	protein_coding	maestro heat-like repeat family member 6
novel_NIR_43861	chr8	143691713;143692330	143691923;143693671	+	143691713	143693671	cassetteExon	ENST00000358656.8	novel	0.24	10	31	0;20	31	n	0.22	11	38	6;16	38	y	0.09	8.5	81	0;17	81	n	0.06	3.5	57	0;7	57	n	0.0198301	-8.59785	down	ENSG00000181135.15	ZNF707	protein_coding	zinc finger protein 707
novel_NIR_43932	chr8	144401673;144402990	144402867;144409015	-	144401673	144409015	cassetteExon	ENST00000616140.1	novel	0.15	20.5	118	38;3	118	y	0.17	25.5	128	37;14	128	y	0.07	12.5	157	24;1	157	n	0.09	12.5	134	20;5	134	n	0.0298575	-5.65685	down	ENSG00000071894.14	CPSF1	protein_coding	cleavage and polyadenylation specific factor 1, 160kDa
novel_NIR_44062	chr8	19506130	19512584	-	19506130	19585166	A5SS	ENST00000332246.10	novel	0.08	2	23	2	23	n	0.09	2	21	2	21	n	0.24	4	13	4	13	y	0.26	6	17	6	17	n	0.0141553	14.758	up	ENSG00000147408.14	CSGALNACT1	protein_coding	chondroitin sulfate N-acetylgalactosaminyltransferase 1
novel_NIR_44205	chr8	26292441	26293666	+	26293283	26293666	5pMXE	ENST00000315985.7	novel	1	4	0	4	0	y	0.94	30	2	30	2	y	0.38	5	8	5	8	y	0.43	9	12	9	12	y	0.00539238	-14.4682	down	ENSG00000221914.8	PPP2R2A	protein_coding	protein phosphatase 2, regulatory subunit B, alpha
novel_NIR_44479	chr8	47729102	47729412	+	47729102	47735307	A3SS	ENST00000518074.5	novel	1	7	0	7	0	y	0.89	17	2	17	2	y	0.25	2	6	2	6	y	0.24	5	16	5	16	y	0.0482168	-12.675	down	ENSG00000164808.16	SPIDR	protein_coding	scaffolding protein involved in DNA repair
novel_NIR_44809	chr8	89981523;89982002	89981953;89982722	-	89981523	89982722	cassetteExon	ENST00000265433.7	novel	0.11	8.5	72	9;8	72	n	0.13	17.5	120	21;14	120	n	0.27	27.5	73	35;20	73	y	0.3	30	71	30;30	71	y	0.0178144	9.15255	up	ENSG00000104320.13	NBN	protein_coding	nibrin
novel_NIR_45095	chr9	113581005	113583450	+	113536918	113583450	A5SS	ENST00000374140.6	novel	0.07	2	27	2	27	n	0.09	3	32	3	32	n	0.18	6	28	6	28	y	0.19	3	13	3	13	y	0.0273751	9.39149	up	ENSG00000138835.22	RGS3	protein_coding	regulator of G-protein signaling 3
novel_NIR_45547	chr9	129489299	129493416	+	129489299;129491128	129490844;129493416	ES	ENST00000608369.1	novel	0.16	8	41.5	8	48;35	y	0.14	8	49.5	8	71;28	n	0.29	13	32	13	44;20	y	0.28	12	31.5	12	47;16	y	0.0189814	12.0748	up	ENSG00000204054.11	LINC00963	processed_transcript	long intergenic non-protein coding RNA 963
novel_NIR_45700	chr9	133411073;133412921	133412778;133417620	-	133411073;133414833	133414665;133417620	MXE	ENST00000371935.6	novel	0.35	3	5.5	6;0	1;10	n	0.37	3.5	6	3;4	0;12	y	0.23	4.5	15.5	9;0	9;22	n	0.26	3.5	10	7;0	0;20	n	0.0329611	-6.37905	down	ENSG00000148300.11	REXO4	protein_coding	REX4, RNA exonuclease 4 homolog (S. cerevisiae)
novel_NIR_45741	chr9	135479724	135482683	+	135480022	135482683	5pMXE	ENST00000356818.6	novel	0.35	11	20	11	20	y	0.37	22	38	22	38	y	0.26	18	52	18	52	y	0.24	13	42	13	42	y	0.0161301	-7.77817	down	ENSG00000196422.10	PPP1R26	protein_coding	protein phosphatase 1, regulatory subunit 26
novel_NIR_46124	chr9	32500939	32550774	-	32544326	32550774	3pMXE	ENST00000360538.6	novel	0.18	4	18	4	18	y	0.16	5	27	5	27	y	0	0	20	0	20	n	0.04	1	26	1	26	n	0.0445338	-6.7082	down	ENSG00000197579.7	TOPORS	protein_coding	topoisomerase I binding, arginine/serine-rich, E3 ubiquitin protein ligase
novel_NIR_46150	chr9	32989895	33025000	-	32989895	33001567	5pMXE	ENST00000379825.6	novel	0.44	30	38	30	38	y	0.42	22	31	22	31	y	0.18	9	41	9	41	y	0.21	12	44	12	44	y	0.00968435	-13.0355	down	ENSG00000137074.18	APTX	protein_coding	aprataxin
novel_NIR_46317	chr9	36052323;36057013	36056910;36058827	+	36052323	36058827	cassetteExon	ENST00000377966.3	novel	0.04	1	27	2;0	27	n	0.02	0.5	21	1;0	21	n	0.23	8	27	6;10	27	y	0.22	2	7	0;4	7	n	0.0110831	17.4413	up	ENSG00000122707.11	RECK	protein_coding	reversion-inducing-cysteine-rich protein with kazal motifs
novel_NIR_46651	chr9	69741858	69759853	-	69734254	69759853	A3SS	ENST00000377200.9	novel	0.68	13	6	13	6	y	0.67	12	6	12	6	y	0.94	32	2	32	2	y	0.93	13	1	13	1	y	0.000738825	36.7696	up	ENSG00000188647.12	PTAR1	protein_coding	protein prenyltransferase alpha subunit repeat containing 1
novel_NIR_46923	chr9	94921345	94923986	+	94801002	94923986	A5SS	ENST00000277198.6	novel	0.13	4	26	4	26	n	0.2	13	51	13	51	y	0.46	29	34	29	34	y	0.54	41	35	41	35	y	0.0253182	6.30283	up	ENSG00000148120.14	C9orf3	protein_coding	chromosome 9 open reading frame 3
novel_NIR_47026	chr9	98732553	98736282	-	98732553	98736527	A5SS	ENST00000375019.6	novel	0.12	2	14	2	14	n	0	0	3	0	3	n	0.57	20	15	20	15	y	0.44	7	9	7	9	y	0.0378054	5.03058	up	ENSG00000165138.16	ANKS6	protein_coding	ankyrin repeat and sterile alpha motif domain containing 6
novel_NIR_47374	chrX	130022977	130028635	+	130022977;130025379	130024990;130028635	ES	ENST00000218147.11	novel	0.12	5	37.5	5	36;39	n	0.09	4	40	4	45;35	n	0.24	11	34	11	15;53	y	0.21	10	37.5	10	35;40	y	0.0298575	5.65685	up	ENSG00000085185.15	BCORL1	protein_coding	BCL6 corepressor-like 1
novel_NIR_47388	chrX	130364844	130365541	+	130364752	130365541	A5SS	ENST00000612248.4	novel	0.25	13	40	13	40	y	0.31	17	38	17	38	y	0.08	5	60	5	60	n	0	0	75	0	75	n	0.0471695	-4.8	down	ENSG00000102078.15	SLC25A14	protein_coding	solute carrier family 25 (mitochondrial carrier, brain), member 14
novel_NIR_47442	chrX	132765150	132956808	-	132708494	132956808	A3SS	ENST00000521489.5	novel	0.22	4	14	4	14	y	0.19	6	26	6	26	y	0.29	4	10	4	10	y	0.31	4	9	4	9	y	0.0454248	5.26965	up	ENSG00000171004.17	HS6ST2	protein_coding	heparan sulfate 6-O-sulfotransferase 2
novel_NIR_47764	chrX	154541391	154551988	+	154547745	154551988	5pMXE	ENST00000594239.5	novel	0.14	16	98	16	98	n	0.13	24	158	24	158	n	0.25	39	116	39	116	y	0.23	24	82	24	82	y	0.0273751	9.39149	up	ENSG00000269335.5	IKBKG	protein_coding	inhibitor of kappa light polypeptide gene enhancer in B-cells, kinase gamma
novel_NIR_47830	chrX	15675778	15764578	+	15750165	15764578	5pMXE	ENST00000454127.2	novel	0.14	51	304	51	304	n	0.11	38	322	38	322	n	0.27	84	227	84	227	y	0.23	74	245	74	245	y	0.0439076	5	up	ENSG00000169239.12	CA5B	protein_coding	carbonic anhydrase VB, mitochondrial
novel_NIR_47873	chrX	16702941	16712558	-	16702941	16712335	A5SS	ENST00000359276.8	novel	0.5	26	26	26	26	y	0.47	28	32	28	32	y	0.32	13	28	13	28	y	0.34	16	31	16	31	y	0.0198301	-8.59785	down	ENSG00000047230.14	CTPS2	protein_coding	CTP synthase 2
novel_NIR_47881	chrX	17737680	17745456	+	17737680;17744219	17744071;17745456	ES	ENST00000380041.7	novel	0.14	2	12.5	2	17;8	n	0.12	3	22.5	3	29;16	n	0.31	10	22.5	10	26;19	y	0.27	6	16	6	25;7	y	0.0405833	7.15542	up	ENSG00000047634.14	SCML1	protein_coding	sex comb on midleg-like 1 (Drosophila)
novel_NIR_48100	chrX	41553915	41559779	-	41553915;41557100	41557032;41559779	ES	ENST00000378158.5	novel	0.56	39	31	39	39;23	y	0.57	48	36.5	48	24;49	y	0.65	54	28.5	54	19;38	y	0.64	34	19	34	8;30	y	0.00772212	11.3137	up	ENSG00000147044.20	CASK	protein_coding	calcium/calmodulin-dependent serine protein kinase (MAGUK family)
novel_NIR_48366	chrX	55753514;55755206	55754836;55755841	+	55753514	55755841	cassetteExon	ENST00000374941.8	novel	0.43	6	8	10;2	8	y	0.38	5	8	0;10	8	n	0.03	0.5	18	0;1	18	n	0.11	1.5	12	0;3	12	n	0.0301407	-7.10199	down	ENSG00000083750.12	RRAGB	protein_coding	Ras-related GTP binding B
novel_NIR_48563	chrX	80730020;80731211	80731139;80733456	-	80730020	80733456	cassetteExon	ENST00000373275.4	novel	0.15	14.5	82	4;25	82	y	0.14	12.5	76	0;25	76	n	0.1	9	81	0;18	81	n	0.11	6	49	0;12	49	n	0.0298575	-5.65685	down	ENSG00000165288.10	BRWD3	protein_coding	bromodomain and WD repeat domain containing 3
Ass, alternative splicing site; Chr, chromosome; ENST, prefix of transcript ID, ensembl transcript; KorN, known or novel; Mss, model splicing site; NIR, non-IR.

## Sheet: Table SIII
Table SIII. Detailed information on IR RASEs between FDPS-OE vs. control samples.
X.ID	Chr	Ass1	Ass2	Strand	Type	Isoform	KorN	Ctrl_1st.Ratio	Ctrl_1st.intron_ave_base	Ctrl_1st.ends_exon_ave_base	Ctrl_1st.isfiltered	Ctrl_2nd.Ratio	Ctrl_2nd.intron_ave_base	Ctrl_2nd.ends_exon_ave_base	Ctrl_2nd.isfiltered	FDPS_1st.Ratio	FDPS_1st.intron_ave_base	FDPS_1st.ends_exon_ave_base	FDPS_1st.isfiltered	FDPS_2nd.Ratio	FDPS_2nd.intron_ave_base	FDPS_2nd.ends_exon_ave_base	FDPS_2nd.isfiltered	Pvalue	Tvalue	DiffType	Gene	Symbol	GeneType	Description
known_IR_52	chr1	212951392	212951589	+	IntronR	ENST00000366968.8	known	0.51	2.18	4.3	y	0.37	3.23	8.8	y	0.88	5.35	6.05	y	1.04	3.41	3.27	y	0.0407315	4.89175	up	ENSG00000143494.15	VASH2	protein_coding	vasohibin 2
known_IR_95	chr1	42830533	42830768	+	IntronR	ENST00000372514.7	known	0.46	2.46	5.36	y	0.59	4.39	7.48	n	0	0	16.31	n	0.07	0.49	7.02	n	0.0411855	-6.6374	down	ENSG00000164010.13	ERMAP	protein_coding	erythroblast membrane-associated protein (Scianna blood group)
known_IR_246	chr11	65503120	65503729	+	IntronR	ENST00000618925.1	known	0.7	443.05	633.65	y	0.69	419.16	610.8	y	0.63	361.61	571.84	y	0.64	294.57	463.05	y	0.0136061	-8.48528	down	ENSG00000251562.7	MALAT1	lincRNA	metastasis associated lung adenocarcinoma transcript 1 (non-protein coding)
known_IR_282	chr11	72237706	72237709	+	IntronR	ENST00000541756.5	known	0.45	119	266.95	y	0.47	129	273.69	y	0.58	150	259.07	y	0.55	146	266.52	y	0.0384207	5.82435	up	ENSG00000165458.13	INPPL1	protein_coding	inositol polyphosphate phosphatase-like 1
known_IR_373	chr13	113096483	113096550	+	IntronR	ENST00000375608.7	known	0	0	10.63	n	0.08	1.06	14.09	n	0.42	3.65	8.6	y	0.53	5	9.36	y	0.0293784	6.39637	up	ENSG00000126217.20	MCF2L	protein_coding	MCF.2 cell line derived transforming sequence-like
known_IR_430	chr14	72969756	72970893	-	IntronR	ENST00000553891.5	known	1.27	7.89	6.2	y	1.36	6.64	4.88	y	0.59	7.99	13.65	y	0.68	6.57	9.62	y	0.00864523	-10.6852	down	ENSG00000165861.13	ZFYVE1	protein_coding	zinc finger, FYVE domain containing 1
known_IR_460	chr15	43873222	43874119	-	IntronR	ENST00000402883.5	known	1.55	0.81	0.52	n	1.99	0.88	0.44	y	0.33	0.08	0.24	n	0	0	0.37	n	0.0333829	-5.83636	down	ENSG00000171877.19	FRMD5	protein_coding	FERM domain containing 5
known_IR_475	chr15	74722356	74722441	-	IntronR	ENST00000612821.4	known	0.73	18.74	25.61	y	0.74	26.01	35.19	y	1.32	26.5	20.13	y	1.38	24.35	17.65	y	0.0269334	20.2211	up	ENSG00000140465.13	CYP1A1	protein_coding	cytochrome P450, family 1, subfamily A, polypeptide 1
known_IR_600	chr16	89159881	89160216	+	IntronR	ENST00000321214.2	known	3.17	0.54	0.17	y	2.88	0.34	0.12	n	0.07	0.08	1.17	n	0.32	0.09	0.27	n	0.00495957	-14.7826	down	ENSG00000180422.3	LINC00304	lincRNA	long intergenic non-protein coding RNA 304
known_IR_610	chr16	89920208	89920590	+	IntronR	ENST00000555427.1	known	1.36	25.47	18.79	y	1.17	27.6	23.52	y	1.94	41.03	21.2	y	1.79	30.41	16.98	y	0.0426063	4.95715	up	ENSG00000258839.2	MC1R	protein_coding	melanocortin 1 receptor (alpha melanocyte stimulating hormone receptor)
known_IR_634	chr17	30768867	30769001	+	IntronR	ENST00000578070.5	known	0.97	19.24	19.73	y	0.99	23.96	24.11	y	1.19	26.31	22.04	y	1.21	20.19	16.73	y	0.00410679	15.5563	up	ENSG00000264538.6	SUZ12P1	transcribed_unprocessed_pseudogene	suppressor of zeste 12 homolog pseudogene 1
known_IR_635	chr17	35844566	35844880	+	IntronR	ENST00000603777.5	known	0.51	206.49	401.65	y	0.53	245.23	459.51	y	0.45	223.91	502.29	y	0.44	217.19	490.45	y	0.0445338	-6.7082	down	ENSG00000270647.5	TAF15	protein_coding	TAF15 RNA polymerase II, TATA box binding protein (TBP)-associated factor, 68kDa
known_IR_639	chr17	39030258	39031152	+	IntronR	ENST00000579258.6	known	0.91	0.3	0.33	y	1	0.44	0.44	y	0.16	0.16	1.05	n	0.18	0.33	1.86	n	0.0288684	-17.029	down	ENSG00000214553.9	LRRC37A11P	transcribed_unprocessed_pseudogene	leucine rich repeat containing 37, member A11, pseudogene
known_IR_759	chr19	12891202	12891271	+	IntronR	ENST00000222214.9	known	0.06	0.94	15.61	n	0.09	1.28	13.6	n	0.32	4.79	14.97	y	0.26	2.57	9.73	y	0.0475378	6.41006	up	ENSG00000105607.12	GCDH	protein_coding	glutaryl-CoA dehydrogenase
known_IR_850	chr19	50482255	50482398	+	IntronR	ENST00000598585.1	known	1.95	155.19	79.74	y	1.9	204.65	107.53	y	1.59	160.64	101.19	y	1.67	169.38	101.2	y	0.0370968	-6.25399	down	ENSG00000161671.16	EMC10	protein_coding	ER membrane protein complex subunit 10
known_IR_898	chr2	113642145	113643190	+	IntronR	ENST00000393165.7	known	2.59	3.58	1.38	y	3.06	4.08	1.33	y	1.22	3.16	2.59	y	1.6	2.96	1.85	n	0.0463469	-4.68233	down	ENSG00000144134.18	RABL2A	protein_coding	RAB, member of RAS oncogene family-like 2A
known_IR_1054	chr22	30663728	30663839	-	IntronR	ENST00000403268.1	known	0.59	2.95	4.97	y	0.93	4.67	5.01	y	1.8	13.39	7.45	y	1.99	10.09	5.06	y	0.047819	5.82818	up	ENSG00000167065.13	DUSP18	protein_coding	dual specificity phosphatase 18
known_IR_1059	chr22	37967170	37967625	+	IntronR	ENST00000442738.6	known	0.21	1.45	6.97	y	0.23	2.54	11.28	n	0.11	1.14	10.7	n	0.1	0.95	9.51	n	0.0239816	-10.2859	down	ENSG00000100142.14	POLR2F	protein_coding	polymerase (RNA) II (DNA directed) polypeptide F
known_IR_1095	chr3	149965347	149966180	-	IntronR	ENST00000423691.2	known	2.26	480.72	212.58	y	2.23	574.11	257.14	y	2.37	626.91	264.42	y	2.34	591.6	253.34	y	0.0352362	5.18545	up	ENSG00000070087.13	PFN2	protein_coding	profilin 2
known_IR_1157	chr3	50274048	50274050	+	IntronR	ENST00000611418.4	known	1.5	117	78.22	n	1.53	162	106.19	y	1.39	141	101.15	n	1.42	142	99.67	n	0.0352362	-5.18545	down	ENSG00000012171.17	SEMA3B	protein_coding	sema domain, immunoglobulin domain (Ig), short basic domain, secreted, (semaphorin) 3B
known_IR_1175	chr3	9893155	9893158	+	IntronR	ENST00000616966.2	known	0.83	107.5	128.94	y	0.81	138	171.16	y	0.91	153	169	y	0.89	151.5	170.11	y	0.0298575	5.65685	up	ENSG00000171135.12	JAGN1	protein_coding	jagunal homolog 1 (Drosophila)
known_IR_1250	chr5	176388259	176388261	-	IntronR	ENST00000613081.4	known	0.5	100	201.58	n	0.51	103	201.04	n	0.59	158	267.85	y	0.57	144	254.61	n	0.0445338	6.7082	up	ENSG00000048162.19	NOP16	protein_coding	NOP16 nucleolar protein
known_IR_1365	chr7	1092642	1092925	+	IntronR	ENST00000617001.1	known	1.07	29.87	27.98	y	0.99	26.83	27.23	y	0.58	21.74	37.46	y	0.7	23.87	33.89	y	0.0434984	-5.40833	down	ENSG00000164850.14	GPER1	protein_coding	G protein-coupled estrogen receptor 1
known_IR_1462	chr8	93754909	93755020	+	IntronR	ENST00000409623.7	known	0.97	20.23	20.94	y	0.92	24.65	26.83	y	0.81	16.2	19.9	y	0.77	20.52	26.82	y	0.0439884	-4.84139	down	ENSG00000164953.15	TMEM67	protein_coding	transmembrane protein 67
novel_IR_74	chr1	11029781	11029902	+	IntronR	ENST00000612387.1	novel	1.22	7.91	6.5	y	1.33	6.06	4.54	y	0.65	2.38	3.69	y	0.49	3.33	6.77	y	0.025324	-7.26187	down	ENSG00000271895.2	RP4-635E18.8	antisense
novel_IR_102	chr1	113758848	113759023	-	IntronR	ENST00000357783.6	novel	0.22	4.57	20.43	y	0.23	7.24	32	y	0.07	1.6	21.67	n	0.06	1.44	22.65	n	0.00194742	-22.6274	down	ENSG00000116793.15	PHTF1	protein_coding	putative homeodomain transcription factor 1
novel_IR_126	chr1	117112453	117113359	-	IntronR	ENST00000256649.8	novel	0.26	2.72	10.27	n	0.24	2.12	8.95	y	0.05	0.55	11.71	n	0.06	0.65	10.69	n	0.0110831	-17.4413	down	ENSG00000134253.9	TRIM45	protein_coding	tripartite motif containing 45
novel_IR_251	chr1	149669314	149672579	+	IntronR	ENST00000430442.2	novel	0.91	3.12	3.42	n	0.83	3.37	4.08	y	0.56	3.45	6.2	y	0.6	2.85	4.74	n	0.0467559	-6.4846	down	ENSG00000277147.4	LINC00869	lincRNA	long intergenic non-protein coding RNA 869
novel_IR_397	chr1	155910506	155911243	-	IntronR	ENST00000539040.5	novel	0.26	12.37	46.9	y	0.28	19.85	72.17	y	0.37	20.99	57.34	n	0.36	23.82	66.71	y	0.0316556	8.49706	up	ENSG00000143622.10	RIT1	protein_coding	Ras-like without CAAX 1
novel_IR_474	chr1	161164250	161164534	+	IntronR	ENST00000368002.7	novel	0.31	27.2	86.43	y	0.34	25.14	73.31	y	0.18	16.48	89.96	n	0.16	12.53	78.62	n	0.0198301	-8.59785	down	ENSG00000143258.15	USP21	protein_coding	ubiquitin specific peptidase 21
novel_IR_562	chr1	169853772	169854270	-	IntronR	ENST00000367771.10	novel	0.61	6.13	10.02	y	0.62	6.35	10.2	y	0.36	4.06	11.39	y	0.38	4.24	11.08	y	0.00793014	-21.9135	down	ENSG00000000457.13	SCYL3	protein_coding	SCY1-like 3 (S. cerevisiae)
novel_IR_747	chr1	217610192	217610321	-	IntronR	ENST00000366934.3	novel	0.22	4.06	18.74	y	0.2	2.91	14.87	n	0.11	1.99	18.11	n	0.12	1.98	16.23	n	0.0316556	-8.49706	down	ENSG00000092978.10	GPATCH2	protein_coding	G patch domain containing 2
novel_IR_764	chr1	222662332	222663998	+	IntronR	ENST00000344922.9	novel	0.27	36.48	135.06	y	0.28	39.11	142.04	y	0.2	31.48	157.92	n	0.21	30.48	143.45	y	0.0100505	-9.89949	down	ENSG00000154305.16	MIA3	protein_coding	melanoma inhibitory activity family, member 3
novel_IR_896	chr1	25306729	25307647	+	IntronR	ENST00000622561.4	novel	0.3	1.49	4.94	n	0.46	1.83	3.95	y	0.96	2.18	2.26	y	0.83	0.73	0.88	n	0.0410648	4.99623	up	ENSG00000187010.18	RHD	protein_coding	Rh blood group, D antigen
novel_IR_911	chr1	26184507	26184585	+	IntronR	ENST00000361530.10	novel	0.24	4.08	16.95	y	0.27	5.64	21.24	y	0.01	0.14	15.76	n	0.06	1.01	18.24	n	0.0290071	-7.54594	down	ENSG00000142675.17	CNKSR1	protein_coding	connector enhancer of kinase suppressor of Ras 1
novel_IR_1008	chr1	3432140	3433677	+	IntronR	ENST00000270722.9	novel	0.66	1.08	1.64	y	0.77	0.75	0.97	y	0.09	0.1	1.02	n	0.2	0.19	0.95	n	0.0181166	-7.3282	down	ENSG00000142611.16	PRDM16	protein_coding	PR domain containing 16
novel_IR_1063	chr1	39967711	39967804	+	IntronR	ENST00000420632.6	novel	0	0	1.17	n	0.13	1	7.97	n	0.82	1.59	1.92	n	0.95	3	3.17	y	0.0123349	8.92042	up	ENSG00000168389.17	MFSD2A	protein_coding	major facilitator superfamily domain containing 2A
novel_IR_1190	chr1	54609547	54611629	-	IntronR	ENST00000371304.2	novel	0.95	3.08	3.23	y	0.82	1.84	2.26	y	0.42	2.26	5.38	y	0.31	2.59	8.29	y	0.0274926	-6.10709	down	ENSG00000162391.11	FAM151A	protein_coding	family with sequence similarity 151, member A
novel_IR_1192	chr1	54610555	54611606	-	IntronR	ENST00000302250.6	novel	1.77	2.32	1.32	y	1.5	1.35	0.9	y	0.46	1.51	3.28	y	0.65	1.48	2.28	y	0.0294177	-6.54245	down	ENSG00000162391.11	FAM151A	protein_coding	family with sequence similarity 151, member A
novel_IR_1193	chr1	54611745	54612486	-	IntronR	ENST00000302250.6	novel	0.2	0.17	0.87	n	0.18	0.13	0.7	n	0.62	1.33	2.14	y	0.61	0.6	0.98	n	0.0035314	38.0132	up	ENSG00000162391.11	FAM151A	protein_coding	family with sequence similarity 151, member A
novel_IR_1253	chr1	67390128	67395547	+	IntronR	ENST00000262345.5	novel	1.2	1.9	1.59	y	1.23	1.73	1.41	y	0.83	1.48	1.77	y	0.86	1.85	2.16	y	0.00327095	-17.442	down	ENSG00000081985.10	IL12RB2	protein_coding	interleukin 12 receptor, beta 2
novel_IR_1283	chr1	84550530	84553035	+	IntronR	ENST00000554297.5	novel	11.47	1.39	0.12	n	12.54	1.06	0.08	n	1.15	0.6	0.52	y	1	0.59	0	n	0.0281619	-20.2321	down	ENSG00000122432.16	SPATA1	transcribed_unprocessed_pseudogene	spermatogenesis associated 1
novel_IR_1352	chr1	99968477	99969305	-	IntronR	ENST00000454219.1	novel	0.23	1.18	5.21	y	0.1	0.71	7.11	n	0.58	1.94	3.32	n	0.68	1.94	2.84	y	0.0342525	5.67031	up	ENSG00000228084.1	RP5-884G6.2	antisense
novel_IR_1365	chr10	100978388	100978527	+	IntronR	ENST00000370250.8	novel	0.34	3.29	9.54	n	0.28	2.22	7.89	n	0.73	13.57	18.61	y	0.83	4.96	6	n	0.0260913	8.06043	up	ENSG00000095539.15	SEMA4G	protein_coding	sema domain, immunoglobulin domain (Ig), transmembrane domain (TM) and short cytoplasmic domain, (semaphorin) 4G
novel_IR_1447	chr10	113159992	113161579	+	IntronR	ENST00000352065.9	novel	0.55	2.28	4.15	n	0.53	3.83	7.28	y	0.26	4.31	16.46	y	0.3	4.03	13.49	y	0.0200565	-11.6276	down	ENSG00000148737.15	TCF7L2	protein_coding	transcription factor 7-like 2 (T-cell specific, HMG-box)
novel_IR_1452	chr10	114861334	114861435	+	IntronR	ENST00000369248.8	novel	0.46	10.39	22.63	y	0.47	15.37	32.49	y	0.28	8.49	29.81	y	0.29	7.74	26.31	y	0.00153965	-25.4558	down	ENSG00000151553.14	FAM160B1	protein_coding	family with sequence similarity 160, member B1
novel_IR_1467	chr10	120906021	120906776	+	IntronR	ENST00000263461.10	novel	0.44	15.11	34.65	y	0.42	16.24	38.42	y	0.17	9.15	53.09	n	0.2	9.01	44.19	y	0.00901081	-13.5902	down	ENSG00000120008.15	WDR11	protein_coding	WD repeat domain 11
novel_IR_1495	chr10	126426090	126429787	-	IntronR	ENST00000284694.11	novel	0.1	0.12	1.22	n	0.08	0.12	1.43	n	0.34	0.12	0.35	n	0.36	0.28	0.77	y	0.00294551	18.3848	up	ENSG00000154493.17	C10orf90	protein_coding	chromosome 10 open reading frame 90
novel_IR_1518	chr10	133357255	133357657	-	IntronR	ENST00000368551.1	novel	0.29	6.28	21.65	y	0.25	3.32	13.41	n	0.1	1.73	18.08	n	0.12	3.02	24.32	n	0.0405833	-7.15542	down	ENSG00000148803.11	FUOM	protein_coding	fucose mutarotase
novel_IR_1697	chr10	73099834	73100084	-	IntronR	ENST00000608005.1	novel	1.59	2.24	1.41	y	1.28	1.74	1.36	y	0.3	0.39	1.33	n	0.61	0.43	0.71	n	0.0465645	-4.47074	down	ENSG00000272630.1	RP11-344N10.5	lincRNA
novel_IR_1763	chr10	87358431	87360481	+	IntronR	ENST00000381697.6	novel	0.16	0.15	0.98	n	0.21	0.3	1.41	y	0.05	0.07	1.43	n	0	0	0.96	n	0.04552	-4.52548	down	ENSG00000214562.13	NUTM2D	protein_coding	NUT family member 2D
novel_IR_1887	chr11	118117454	118117902	+	IntronR	ENST00000618855.4	novel	0.24	0.24	1.02	n	0.32	0.6	1.9	y	0.06	0.06	1.15	n	0	0	1.4	n	0.0439076	-5	down	ENSG00000137648.16	TMPRSS4	protein_coding	transmembrane protease, serine 4
novel_IR_1888	chr11	118534355	118535508	+	IntronR	ENST00000533102.5	novel	1	0.38	0	n	0.78	0.13	0.16	n	2.41	0.78	0.32	y	2.23	0.33	0.15	y	0.0110526	10.0614	up	ENSG00000149582.15	TMEM25	protein_coding	transmembrane protein 25
novel_IR_1939	chr11	124894369	124895081	-	IntronR	ENST00000306534.7	novel	1	0.41	0	n	0.79	0.41	0.52	y	0.14	0.62	4.29	n	0	0	0.61	n	0.0316214	-6.53754	down	ENSG00000154133.14	ROBO4	protein_coding	roundabout, axon guidance receptor, homolog 4 (Drosophila)
novel_IR_2003	chr11	1763052	1763542	-	IntronR	ENST00000446489.1	novel	8.88	7.19	0.81	y	8	4.19	0.52	y	1.51	3.24	2.15	y	0.96	2.41	2.52	y	0.00993052	-13.886	down	ENSG00000229512.1	AC068580.5	sense_intronic
novel_IR_2148	chr11	57325697	57327743	+	IntronR	ENST00000534162.1	novel	0.76	234.8	309.69	y	0.75	272.53	364.33	y	0.82	291.43	356.92	y	0.81	269.2	330.96	y	0.0136061	8.48528	up	ENSG00000254662.1	RP11-872D17.4	antisense
novel_IR_2257	chr11	64797380	64797501	-	IntronR	ENST00000294066.6	novel	0.23	19.33	85.57	y	0.24	28.82	118.88	y	0.12	10.18	81.99	n	0.11	10.22	96.74	n	0.00345424	-16.9706	down	ENSG00000168067.11	MAP4K2	protein_coding	mitogen-activated protein kinase kinase kinase kinase 2
novel_IR_2337	chr11	6608489	6608884	+	IntronR	ENST00000528995.5	novel	0.38	95.04	250.07	y	0.37	112.49	307.8	y	0.32	129.16	399.98	y	0.33	113.74	339.85	y	0.0194193	-7.07107	down	ENSG00000166333.13	ILK	protein_coding	integrin-linked kinase
novel_IR_2381	chr11	67436350	67437617	-	IntronR	ENST00000326294.3	novel	2.24	2.54	1.13	y	2.55	2.46	0.97	y	0.8	1.04	1.3	n	0.69	0.92	1.33	n	0.0381131	-10.0323	down	ENSG00000213402.2	PTPRCAP	protein_coding	protein tyrosine phosphatase, receptor type, C-associated protein
novel_IR_2382	chr11	67493837	67493922	-	IntronR	ENST00000534749.5	novel	0.12	7.18	58.87	n	0.18	12.93	73.06	n	0.33	21.6	66.13	y	0.37	19.71	53.54	y	0.0416957	5.547	up	ENSG00000110697.12	PITPNM1	protein_coding	phosphatidylinositol transfer protein, membrane-associated 1
novel_IR_2538	chr11	8699390	8702572	-	IntronR	ENST00000526757.5	novel	0.21	7.28	35.39	y	0.19	7.57	40.25	n	0.14	6.82	47.46	n	0.12	6.67	55.22	n	0.0384761	-4.94975	down	ENSG00000166444.17	ST5	protein_coding	suppression of tumorigenicity 5
novel_IR_2541	chr11	90183008	90191558	+	IntronR	ENST00000534061.5	novel	0.59	6.08	10.25	y	0.57	7.46	13.2	y	0.43	7	16.17	y	0.41	6.5	15.94	y	0.00772212	-11.3137	down	ENSG00000077616.10	NAALAD2	protein_coding	N-acetylated alpha-linked acidic dipeptidase 2
novel_IR_2564	chr12	102074467	102075001	-	IntronR	ENST00000552283.5	novel	0.13	2.62	19.93	n	0.14	3.28	22.81	n	0.26	6.05	23.3	y	0.29	6.01	20.97	y	0.0468821	8.85438	up	ENSG00000075188.8	NUP37	protein_coding	nucleoporin 37kDa
novel_IR_2692	chr12	123926820	123928387	+	IntronR	ENST00000409039.7	novel	0.36	0.65	1.82	y	0.25	0.28	1.14	n	1.18	0.83	0.7	y	1	0.09	0	n	0.0288602	7.44251	up	ENSG00000197653.14	DNAH10	protein_coding	dynein, axonemal, heavy chain 10
novel_IR_2721	chr12	132619574	132619844	+	IntronR	ENST00000449132.6	novel	1.05	0.62	0.59	n	0.9	0.33	0.37	n	17.5	1.57	0.09	n	15.76	1.56	0.1	y	0.034083	17.9278	up	ENSG00000187848.12	P2RX2	protein_coding	purinergic receptor P2X, ligand gated ion channel, 2
novel_IR_2886	chr12	50105688	50106288	+	IntronR	ENST00000301149.7	novel	1.49	1.28	0.86	n	0.81	1.81	2.23	n	3.68	1.34	0.36	y	4.18	1.66	0.4	n	0.0275163	6.58738	up	ENSG00000167588.12	GPD1	protein_coding	glycerol-3-phosphate dehydrogenase 1 (soluble)
novel_IR_2966	chr12	54082165	54102214	+	IntronR	ENST00000504891.1	novel	1.21	0.34	0.28	n	1	0.39	0	n	0.16	0.13	0.84	n	0.28	0.18	0.65	y	0.0327068	-7.31805	down	ENSG00000249388.1	RP11-834C11.6	lincRNA
novel_IR_3025	chr12	56474896	56475044	-	IntronR	ENST00000623608.3	novel	1	3.98	3.99	y	1.02	7.36	7.2	y	1.97	1.72	0.87	n	1.83	3.48	1.91	y	0.0458955	12.5865	up	ENSG00000135423.12	GLS2	protein_coding	glutaminase 2 (liver, mitochondrial)
novel_IR_3249	chr12	9149602	9150644	-	IntronR	ENST00000261336.6	novel	0.45	0.72	1.59	n	0.42	0.82	1.95	y	0.95	0.78	0.83	n	1	0.56	0	n	0.00676175	18.5218	up	ENSG00000126838.9	PZP	protein_coding	pregnancy-zone protein
novel_IR_3278	chr12	9315778	9316021	-	IntronR	ENST00000543664.1	novel	0	0	0.53	n	0.15	0.32	2.17	n	3.2	1.8	0.56	y	3.39	7.92	2.33	y	0.00184798	26.6034	up	ENSG00000255753.1	RP11-22B23.2	processed_pseudogene
novel_IR_3370	chr13	20703444	20703996	+	IntronR	ENST00000304920.3	novel	0.48	0.51	1.06	y	0.4	0.68	1.7	y	0.14	0.07	0.51	n	0.21	0.25	1.2	n	0.0393173	-4.98582	down	ENSG00000172458.4	IL17D	protein_coding	interleukin 17D
novel_IR_3386	chr13	30540965	30543017	-	IntronR	ENST00000393978.2	novel	0.62	0.21	0.33	y	0.73	0.14	0.2	n	4.24	0.43	0.1	n	4.42	0.36	0.08	n	0.00230008	34.6527	up	ENSG00000213411.2	RBM22P2	processed_pseudogene	RNA binding motif protein 22 pseudogene 2
novel_IR_3437	chr13	49544863	49549458	-	IntronR	ENST00000258646.3	novel	0.22	2.19	9.78	y	0.21	1.81	8.43	y	0.5	2.24	4.46	y	0.48	1.98	4.12	y	0.00669345	24.5967	up	ENSG00000136144.11	RCBTB1	protein_coding	regulator of chromosome condensation (RCC1) and BTB (POZ) domain containing protein 1
novel_IR_3472	chr13	87801279	87803010	-	IntronR	ENST00000606785.1	novel	0.28	0.54	1.95	y	0.63	1.05	1.67	y	1.93	0.82	0.43	y	2.14	0.99	0.46	y	0.0278375	7.74194	up	ENSG00000223404.3	LINC00397	lincRNA	long intergenic non-protein coding RNA 397
novel_IR_3638	chr14	26798030	26806236	+	IntronR	ENST00000552101.1	novel	1.02	0.89	0.87	n	1.11	0.65	0.58	n	0.71	0.99	1.4	y	0.61	0.54	0.89	n	0.027191	-6.02068	down	ENSG00000257842.5	NOVA1-AS1	antisense	NOVA1 antisense RNA 1 (head to head)
novel_IR_3697	chr14	50904192	50904339	+	IntronR	ENST00000353130.5	novel	2.37	9.05	3.82	y	2.77	8.34	3.01	y	1.31	3.71	2.83	y	0.79	2.66	3.36	y	0.0490879	-4.6338	down	ENSG00000131969.14	ABHD12B	protein_coding	abhydrolase domain containing 12B
novel_IR_3720	chr14	58427637	58428238	+	IntronR	ENST00000354386.10	novel	2.35	7.07	3	y	2.42	9.01	3.72	y	1.17	5.3	4.53	y	1.18	5.86	4.95	y	0.016236	-34.224	down	ENSG00000100578.14	KIAA0586	protein_coding	KIAA0586
novel_IR_3722	chr14	61307235	61322535	-	IntronR	ENST00000500036.2	novel	0.85	1.36	1.61	n	0.92	1.55	1.68	y	0.62	1.5	2.41	n	0.68	1.41	2.07	y	0.038166	-5.09787	down	ENSG00000247287.2	RP11-902B17.1	antisense
novel_IR_3752	chr14	64951151	64951603	-	IntronR	ENST00000267512.9	novel	0.49	2.86	5.86	y	0.71	2.56	3.61	y	1.74	3.06	1.76	y	1.89	5.24	2.78	y	0.0172539	9.12606	up	ENSG00000139998.14	RAB15	protein_coding	RAB15, member RAS oncogene family
novel_IR_3861	chr15	22664960	22667898	+	IntronR	ENST00000611636.4	novel	0.49	2.47	5.02	y	0.44	1.41	3.24	n	0.29	1.06	3.61	y	0.32	1.44	4.48	y	0.0481499	-5.48795	down	ENSG00000276141.4	WHAMMP3	transcribed_unprocessed_pseudogene	WAS protein homolog associated with actin, golgi membranes and microtubules pseudogene 3
novel_IR_3892	chr15	33857914	33859575	+	IntronR	ENST00000415757.7	novel	0.51	2.74	5.39	y	0.41	2.33	5.64	y	1.33	3	2.25	y	1.25	4.78	3.82	y	0.00704624	12.9624	up	ENSG00000198838.11	RYR3	protein_coding	ryanodine receptor 3
novel_IR_3923	chr15	38500139	38501143	-	IntronR	ENST00000310803.9	novel	0.97	1.15	1.19	y	1	0.15	0	n	0.66	1.16	1.75	y	0.71	0.86	1.21	y	0.0175918	-10.2899	down	ENSG00000172575.11	RASGRP1	protein_coding	RAS guanyl releasing protein 1 (calcium and DAG-regulated)
novel_IR_3975	chr15	41849959	41850854	-	IntronR	ENST00000320955.7	novel	0.18	0.66	3.56	n	0.2	0.33	1.67	n	0.26	0.39	1.54	y	0.28	0.58	2.05	y	0.0298575	5.65685	up	ENSG00000137877.9	SPTBN5	protein_coding	spectrin, beta, non-erythrocytic 5
novel_IR_4057	chr15	45150701	45151123	+	IntronR	ENST00000321429.8	novel	1.26	1.5	1.19	y	1	1.05	0	n	0.18	0.38	2.12	n	0.4	0.65	1.6	y	0.0408787	-4.93265	down	ENSG00000137857.17	DUOX1	protein_coding	dual oxidase 1
novel_IR_4142	chr15	63908600	63911908	-	IntronR	ENST00000261891.7	novel	0.55	4.06	7.43	y	0.58	4.03	7	y	0.45	2.8	6.19	y	0.43	2.43	5.62	n	0.0286201	-6.93375	down	ENSG00000035664.11	DAPK2	protein_coding	death-associated protein kinase 2
novel_IR_4298	chr15	80948898	80951959	-	IntronR	ENST00000561312.5	novel	4.61	29.63	6.43	y	5.31	34.92	6.57	y	7.19	35.54	4.94	y	7.83	35.17	4.49	y	0.0334602	5.37707	up	ENSG00000117899.10	MESDC2	protein_coding	mesoderm development candidate 2
novel_IR_4330	chr15	87577764	87578075	+	IntronR	ENST00000560153.2	novel	0.26	0.18	0.68	n	0	0	0.63	n	2.02	1.12	0.56	n	2.41	1.54	0.64	y	0.0187029	8.89654	up	ENSG00000259527.2	LINC00052	lincRNA	long intergenic non-protein coding RNA 52
novel_IR_4424	chr16	1344698	1344798	+	IntronR	ENST00000426824.7	novel	0.53	4	7.61	y	0.47	4.97	10.67	y	0.02	0.12	5.79	n	0	0	5.41	n	0.0237966	-15.4952	down	ENSG00000007516.13	BAIAP3	protein_coding	BAI1-associated protein 3
novel_IR_4636	chr16	28989225	28990411	-	IntronR	ENST00000561471.1	novel	5.98	2.07	0.35	y	5.58	2.05	0.37	y	1.45	4.2	2.89	y	0.93	2.34	2.51	y	0.00649887	-13.9929	down	ENSG00000261552.1	RP11-264B17.5	antisense
novel_IR_4695	chr16	30534310	30534451	-	IntronR	ENST00000568028.1	novel	0.61	6.16	10.08	y	0.51	6.56	12.83	y	0.07	1.12	15.39	n	0.03	0.34	10.23	n	0.0362355	-9.47046	down	ENSG00000169955.7	ZNF747	protein_coding	zinc finger protein 747
novel_IR_4862	chr16	57079629	57081098	+	IntronR	ENST00000262510.10	novel	0.06	0.86	14.88	n	0.08	0.84	11.13	n	0.21	2.19	10.42	y	0.18	0.9	4.89	n	0.0286201	6.93375	up	ENSG00000140853.15	NLRC5	protein_coding	NLR family, CARD domain containing 5
novel_IR_4937	chr16	67187138	67187225	-	IntronR	ENST00000314586.10	novel	6.18	3	0.49	y	7.37	12.93	1.76	y	3.41	6.27	1.84	y	2.06	1	0.49	n	0.0475447	-4.48986	down	ENSG00000179044.15	EXOC3L1	protein_coding	exocyst complex component 3-like 1
novel_IR_4955	chr16	67291837	67293544	-	IntronR	ENST00000304372.5	novel	0.12	0.22	1.82	n	0.21	0.23	1.12	n	0.8	0.86	1.07	n	0.7	0.62	0.88	y	0.0134066	8.69654	up	ENSG00000168676.10	KCTD19	protein_coding	potassium channel tetramerization domain containing 19
novel_IR_5159	chr16	87396941	87400021	-	IntronR	ENST00000569147.1	novel	1.09	16.05	14.69	y	1.16	14.61	12.57	y	1.92	15.14	7.88	y	2.02	14.03	6.95	y	0.00790339	13.845	up	ENSG00000261592.1	RP11-178L8.3	antisense
novel_IR_5440	chr17	38919021	38921535	-	IntronR	ENST00000580121.1	novel	1.69	531.8	313.93	y	1.67	605.48	361.78	y	1.81	660.35	365.27	y	1.79	642.33	358.3	y	0.0136061	8.48528	up	ENSG00000265784.1	RP1-56K13.3	antisense
novel_IR_5522	chr17	42665562	42665678	+	IntronR	ENST00000251412.7	novel	0.34	19.77	58.73	y	0.32	21.32	66.95	y	0.4	29.97	75.03	y	0.42	29.15	70.22	y	0.0298575	5.65685	up	ENSG00000037042.8	TUBG2	protein_coding	tubulin, gamma 2
novel_IR_5646	chr17	47831999	47832100	+	IntronR	ENST00000269025.8	novel	1.38	3.76	2.72	y	1.45	3.51	2.42	y	0.14	0.55	3.83	n	0	0	4.52	n	0.0113254	-17.1858	down	ENSG00000141294.9	LRRC46	protein_coding	leucine rich repeat containing 46
novel_IR_5647	chr17	47835399	47835666	+	IntronR	ENST00000269025.8	novel	0.16	0.87	5.48	n	0.24	1.74	7.18	y	0.49	1.51	3.09	n	0.53	2.16	4.07	n	0.0424822	6.93181	up	ENSG00000141294.9	LRRC46	protein_coding	leucine rich repeat containing 46
novel_IR_5783	chr17	58557047	58557799	-	IntronR	ENST00000389934.7	novel	1.35	1.11	0.82	y	1.21	0.39	0.32	n	0	0	1.86	n	0.19	0.2	1.05	n	0.0128455	-10.042	down	ENSG00000121101.15	TEX14	protein_coding	testis expressed 14
novel_IR_5832	chr17	64892868	64909595	+	IntronR	ENST00000584959.1	novel	0.76	0.71	0.94	y	0.67	0.66	0.99	n	0.42	0.66	1.55	y	0.37	0.74	2.03	y	0.0436755	-6.21623	down	ENSG00000265218.1	RP11-927P21.1	antisense
novel_IR_5912	chr17	73207256	73208314	+	IntronR	ENST00000299886.8	novel	0.87	64.27	74.09	y	0.82	76.48	93.8	y	0.69	76.82	112.14	y	0.66	72.85	110.33	y	0.0437537	-5.83095	down	ENSG00000166685.11	COG1	protein_coding	component of oligomeric golgi complex 1
novel_IR_6068	chr17	7855284	7855771	+	IntronR	ENST00000574668.1	novel	0.85	0.48	0.56	y	0.75	0.63	0.84	y	0.1	0.23	2.2	n	0.03	0.09	3.2	n	0.010125	-12.0427	down	ENSG00000167874.6	TMEM88	protein_coding	transmembrane protein 88
novel_IR_6185	chr17	82244978	82245172	+	IntronR	ENST00000620937.1	novel	0.15	3.73	24.08	n	0.19	5.98	31.71	n	0.38	11.11	29.62	y	0.34	10.56	31.5	y	0.0214502	6.71751	up	ENSG00000275888.1	RP13-516M14.10	antisense
novel_IR_6222	chr17	8513669	8513786	-	IntronR	ENST00000360416.7	novel	0.2	2.93	14.65	y	0.16	1.91	11.78	n	0	0.05	24.04	n	0.03	0.67	23.1	n	0.026784	-6.6	down	ENSG00000133026.12	MYH10	protein_coding	myosin, heavy chain 10, non-muscle
novel_IR_6239	chr18	12984190	12986862	+	IntronR	ENST00000399892.6	novel	0.38	17.83	47.36	y	0.36	21.8	60.03	y	0.43	24.09	55.4	y	0.45	23.78	52.66	y	0.0384761	4.94975	up	ENSG00000085415.15	SEH1L	protein_coding	SEH1-like (S. cerevisiae)
novel_IR_6266	chr18	23867917	23871431	+	IntronR	ENST00000313654.13	novel	0.22	0.39	1.8	y	0.23	0.74	3.22	n	0.07	0.32	4.4	n	0.08	0.42	4.97	n	0.00221484	-21.2132	down	ENSG00000053747.15	LAMA3	protein_coding	laminin, alpha 3
novel_IR_6348	chr18	57668540	57669318	-	IntronR	ENST00000283684.8	novel	0.1	0.96	9.82	n	0.09	1.14	12.63	n	0.23	2.27	9.91	n	0.26	2	7.69	y	0.0431348	9.48683	up	ENSG00000081923.10	ATP8B1	protein_coding	ATPase, aminophospholipid transporter, class I, type 8B, member 1
novel_IR_6576	chr19	16808136	16815028	+	IntronR	ENST00000524140.6	novel	0.28	0.2	0.71	y	0.23	0.21	0.91	n	0.05	0.02	0.46	n	0.08	0.05	0.6	n	0.0366694	-6.51695	down	ENSG00000188039.13	NWD1	protein_coding	NACHT and WD repeat domain containing 1
novel_IR_6591	chr19	17323884	17324717	-	IntronR	ENST00000159087.6	novel	0.75	8.81	11.79	y	0.81	12.36	15.27	y	1.4	15.34	10.99	y	1.29	15.6	12.13	y	0.0254275	9.01838	up	ENSG00000074855.10	ANO8	protein_coding	anoctamin 8
novel_IR_6691	chr19	19892458	19895471	-	IntronR	ENST00000585571.1	novel	0.44	4.57	10.32	y	0.53	4.47	8.41	y	0.94	6.51	6.94	y	0.91	5.14	5.65	y	0.0443219	9.27601	up	ENSG00000267565.1	CTC-559E9.8	antisense
novel_IR_6693	chr19	203994	204844	-	IntronR	ENST00000632351.1	novel	0.22	1.08	4.86	y	0.24	1.53	6.44	y	0.31	2.26	7.28	y	0.3	2.97	9.75	y	0.0445338	6.7082	up	ENSG00000282508.1	LINC01002	processed_transcript	long intergenic non-protein coding RNA 1002
novel_IR_6710	chr19	2416809	2418002	+	IntronR	ENST00000613480.1	novel	0.18	1.09	6.19	n	0.23	1.21	5.25	y	0.7	1.53	2.18	y	0.65	1.15	1.77	y	0.00561109	13.2936	up	ENSG00000178297.12	TMPRSS9	protein_coding	transmembrane protease, serine 9
novel_IR_6758	chr19	35015052	35024902	-	IntronR	ENST00000605640.1	novel	3.88	10.79	2.78	y	2.85	11.09	3.89	y	9.17	10.58	1.15	y	7.59	9.41	1.24	y	0.0459126	5.31791	up	ENSG00000271032.1	CTD-2527I21.14	antisense
novel_IR_6775	chr19	3544309	3544357	-	IntronR	ENST00000389395.7	novel	1.05	341.72	325.15	y	1.02	310	304.87	y	1.25	357.85	286.19	y	1.22	346.06	282.69	y	0.0110636	9.42809	up	ENSG00000161091.12	MFSD12	protein_coding	major facilitator superfamily domain containing 12
novel_IR_6792	chr19	35619758	35620012	+	IntronR	ENST00000203166.9	novel	0.39	16.72	42.93	y	0.43	21.78	50.71	y	0.21	8.54	41.48	y	0.2	8.44	41.24	y	0.0493021	-9.94396	down	ENSG00000249115.8	HAUS5	protein_coding	HAUS augmin-like complex, subunit 5
novel_IR_6877	chr19	37566089	37567618	+	IntronR	ENST00000586139.5	novel	1.15	1.49	1.3	n	1.31	2.27	1.74	y	0.11	0.39	3.47	n	0.28	1.13	4.06	n	0.0126236	-8.86691	down	ENSG00000267470.5	ZNF571-AS1	antisense	ZNF571 antisense RNA 1
novel_IR_7128	chr19	48333433	48334008	-	IntronR	ENST00000293261.7	novel	0.22	1.83	8.43	y	0.17	2.04	11.82	n	0.06	0.64	11.53	n	0.02	0.26	10.61	n	0.0439884	-4.84139	down	ENSG00000161558.10	TMEM143	protein_coding	transmembrane protein 143
novel_IR_7160	chr19	49150151	49150236	+	IntronR	ENST00000334186.8	novel	0.13	1.21	9.21	n	0.08	0.75	9.09	n	0.36	3.29	9.2	y	0.32	2.58	7.97	y	0.0205091	7.34017	up	ENSG00000177380.13	PPFIA3	protein_coding	protein tyrosine phosphatase, receptor type, f polypeptide (PTPRF), interacting protein (liprin), alpha 3
novel_IR_7252	chr19	52059107	52063647	-	IntronR	ENST00000569091.1	novel	1.6	2.29	1.43	y	1.73	1.93	1.12	y	2.28	1.54	0.68	n	2.48	2.73	1.1	y	0.0377932	5.99487	up	ENSG00000260160.1	CTC-471J1.2	sense_overlapping
novel_IR_7301	chr19	549185	549630	+	IntronR	ENST00000592501.5	novel	5.36	2.63	0.49	y	4.82	2.89	0.6	y	2.07	1.97	0.95	y	1.82	1.29	0.71	y	0.0259139	-10.5703	down	ENSG00000197540.7	GZMM	protein_coding	granzyme M (lymphocyte met-ase 1)
novel_IR_7375	chr19	57492211	57492856	+	IntronR	ENST00000426954.6	novel	0.11	1.14	10.67	n	0.09	1.16	13.17	n	0.23	3.14	13.87	y	0.22	2.75	12.54	n	0.0212375	11.1803	up	ENSG00000105136.19	ZNF419	protein_coding	zinc finger protein 419
novel_IR_7499	chr19	9811717	9818728	-	IntronR	ENST00000586469.1	novel	0.32	6.79	20.97	y	0.3	6.7	22.45	y	0.25	6.97	28.19	y	0.23	5.64	24.51	y	0.0384761	-4.94975	down	ENSG00000127452.8	FBXL12	protein_coding	F-box and leucine-rich repeat protein 12
novel_IR_7540	chr2	112185339	112187387	+	IntronR	ENST00000409903.5	novel	0.06	0.5	8.14	n	0.1	0.48	4.95	n	0.22	0.83	3.85	y	0.26	0.86	3.34	y	0.0298575	5.65685	up	ENSG00000144152.12	FBLN7	protein_coding	fibulin 7
novel_IR_7578	chr2	127053445	127053905	-	IntronR	ENST00000357970.7	novel	0.31	4.36	14.29	y	0.38	2.84	7.43	n	0.72	5.49	7.68	y	0.84	3.97	4.74	y	0.0405439	6.2624	up	ENSG00000136717.14	BIN1	protein_coding	bridging integrator 1
novel_IR_7846	chr2	178615374	178619753	+	IntronR	ENST00000456053.5	novel	1.6	7.32	4.58	y	1.04	7.22	6.95	y	3.46	7.43	2.15	y	3.86	6.55	1.7	y	0.0269689	6.80049	up	ENSG00000237298.8	TTN-AS1	antisense	TTN antisense RNA 1
novel_IR_7860	chr2	178621741	178621840	-	IntronR	ENST00000342992.10	novel	1.48	2.55	1.72	y	1.21	4.84	4.01	y	0	0	0.67	n	0.27	0.88	3.25	n	0.0240031	-6.33777	down	ENSG00000155657.23	TTN	protein_coding	titin
novel_IR_7905	chr2	190497719	190500015	+	IntronR	ENST00000392328.5	novel	0.11	1.09	10.09	n	0.13	1.93	14.96	n	0.22	2.47	11.45	n	0.23	2.94	12.72	y	0.0273751	9.39149	up	ENSG00000151690.14	MFSD6	protein_coding	major facilitator superfamily domain containing 6
novel_IR_7924	chr2	19993166	19994299	-	IntronR	ENST00000407540.7	novel	0.74	1.39	1.88	n	0.62	0.86	1.39	y	0.17	0.52	2.98	n	0.12	0.26	2.11	n	0.0416119	-8.23077	down	ENSG00000132031.12	MATN3	protein_coding	matrilin 3
novel_IR_8023	chr2	219245796	219245896	+	IntronR	ENST00000396738.6	novel	0.17	3.64	21.64	n	0.1	2.15	22.08	n	0.34	5.2	15.5	n	0.42	9.23	21.94	y	0.0454556	4.60953	up	ENSG00000115661.13	STK16	protein_coding	serine/threonine kinase 16
novel_IR_8035	chr2	219425190	219426081	-	IntronR	ENST00000431827.1	novel	0.32	3.96	12.47	y	0.28	2.44	8.78	y	0.41	5.38	13	y	0.44	6.61	14.97	y	0.0439076	5	up	ENSG00000234638.1	AC053503.6	antisense
novel_IR_8054	chr2	223965904	223967482	-	IntronR	ENST00000425192.1	novel	2.1	16.81	7.99	y	1.98	18.99	9.57	y	2.67	22.46	8.41	y	2.87	22.9	7.97	y	0.0390965	6.2597	up	ENSG00000228802.1	AC073641.2	antisense
novel_IR_8063	chr2	227303110	227303859	+	IntronR	ENST00000396578.7	novel	0.04	0.2	4.98	n	0	0	10.79	n	0.27	0.39	1.47	n	0.23	1.33	5.82	y	0.0147882	8.13173	up	ENSG00000169031.18	COL4A3	protein_coding	collagen, type IV, alpha 3 (Goodpasture antigen)
novel_IR_8158	chr2	241725169	241725665	-	IntronR	ENST00000435195.1	novel	1.61	7.09	4.4	y	1.53	9.57	6.25	y	1.18	5.53	4.67	y	1.05	7.06	6.69	y	0.040901	-5.96161	down	ENSG00000235351.1	AC114730.11	antisense
novel_IR_8243	chr2	3298446	3300854	-	IntronR	ENST00000454977.1	novel	0	0	0.41	n	0.31	0.12	0.38	n	2.94	0.22	0.08	y	3.58	0.06	0.02	n	0.0318196	8.73263	up	ENSG00000224885.1	TSSC1-IT1	sense_intronic	TSSC1 intronic transcript 1
novel_IR_8255	chr2	38004216	38012603	+	IntronR	ENST00000407257.5	novel	0.14	0.15	1.1	n	0.04	0.21	5.46	n	0.46	0.28	0.62	y	0.36	0.17	0.45	n	0.04552	4.52548	up	ENSG00000115841.19	RMDN2	protein_coding	regulator of microtubule dynamics 2
novel_IR_8306	chr2	55334376	55334379	-	IntronR	ENST00000621814.4	novel	1.21	139	114.46	y	1.23	169	137.56	y	1.1	158	143.57	y	1.07	145	135.97	y	0.025109	-7.48845	down	ENSG00000115355.15	CCDC88A	protein_coding	coiled-coil domain containing 88A
novel_IR_8350	chr2	68134799	68137299	-	IntronR	ENST00000406245.6	novel	0.21	2.04	9.64	y	0.24	2.25	9.38	y	0.08	0.87	10.67	n	0.11	1.15	10.66	n	0.0256088	-6.12826	down	ENSG00000243667.6	WDR92	protein_coding	WD repeat domain 92
novel_IR_8392	chr2	74391615	74391994	+	IntronR	ENST00000437991.1	novel	121.8	5.89	0.05	y	110.07	7.11	0.06	y	50.33	9.61	0.19	y	39.06	11.75	0.3	y	0.0128479	-8.75899	down	ENSG00000237737.5	DCTN1-AS1	antisense	DCTN1 antisense RNA 1
novel_IR_8706	chr20	38218366	38219630	-	IntronR	ENST00000279024.8	novel	0.56	1.66	2.97	y	0.94	5.16	5.52	y	3.19	6.7	2.1	y	2.85	5.96	2.1	y	0.0128567	8.90367	up	ENSG00000149633.11	KIAA1755	protein_coding	KIAA1755
novel_IR_8745	chr20	44659181	44659711	-	IntronR	ENST00000415889.2	novel	0.36	3.43	9.45	y	0.32	4.01	12.54	y	0.05	0.28	5.38	n	0.06	0.78	13.24	n	0.0341085	-13.8245	down	ENSG00000132832.9	LINC01260	antisense	long intergenic non-protein coding RNA 1260
novel_IR_8826	chr20	59915550	59916486	-	IntronR	ENST00000357552.7	novel	0.14	0.51	3.79	n	0.4	1.05	2.62	y	1.16	1.01	0.88	y	1	0.31	0	n	0.0492841	5.30649	up	ENSG00000196074.12	SYCP2	protein_coding	synaptonemal complex protein 2
novel_IR_8968	chr21	39217177	39219402	-	IntronR	ENST00000435608.1	novel	44.37	5.53	0.12	y	38.8	6.58	0.17	y	1	4.1	0	n	4.9	4.75	0.97	y	0.011217	-11.3639	down	ENSG00000237373.1	BRWD1-IT1	sense_overlapping	BRWD1 intronic transcript 1
novel_IR_9005	chr21	44418108	44418423	+	IntronR	ENST00000300482.9	novel	0.41	3.21	7.78	y	0.38	4.27	11.14	y	0.13	1.4	10.66	n	0.17	2.02	11.66	n	0.0130684	-9.8	down	ENSG00000142185.16	TRPM2	protein_coding	transient receptor potential cation channel, subfamily M, member 2
novel_IR_9068	chr22	19524542	19525155	-	IntronR	ENST00000413119.2	novel	1	0.24	0	n	1.11	0.26	0.24	y	0	0	0.17	n	0.18	0.12	0.67	n	0.0206278	-9.14908	down	ENSG00000184113.9	CLDN5	protein_coding	claudin 5
novel_IR_9077	chr22	20064924	20065496	-	IntronR	ENST00000600090.1	novel	1.29	37.43	29.05	y	1.28	41.81	32.68	y	1.03	44.46	43.25	y	1.01	43.37	43.04	y	0.00706748	-23.7023	down	ENSG00000268292.1	AC006547.15	antisense
novel_IR_9153	chr22	23838716	23838895	-	IntronR	ENST00000404056.1	novel	1.4	10.11	7.25	y	1.42	10.62	7.48	y	0.59	3.23	5.44	y	0.53	2.2	4.16	n	0.012173	-26.8794	down	ENSG00000099958.14	DERL3	protein_coding	derlin 3
novel_IR_9187	chr22	29142100	29167044	+	IntronR	ENST00000327813.9	novel	0.93	0.71	0.76	y	0.43	0.85	1.97	y	2.13	0.65	0.3	y	2.45	0.38	0.15	y	0.0454174	5.42423	up	ENSG00000183762.12	KREMEN1	protein_coding	kringle containing transmembrane protein 1
novel_IR_9259	chr22	37570412	37570576	-	IntronR	ENST00000215886.5	novel	7.46	3.79	0.51	y	5.76	5.69	0.99	y	0.44	0.82	1.87	n	2.04	1.72	0.84	y	0.0444496	-4.60051	down	ENSG00000100079.6	LGALS2	protein_coding	lectin, galactoside-binding, soluble, 2
novel_IR_9283	chr22	38388278	38388678	-	IntronR	ENST00000454123.1	novel	10.79	2.93	0.27	n	10.62	2.61	0.25	y	0.5	1.11	2.22	n	0.27	0.66	2.5	y	0.000342484	-72.1661	down	ENSG00000229955.1	RP1-5O6.4	sense_intronic
novel_IR_9403	chr22	50466074	50466150	-	IntronR	ENST00000380817.7	novel	0.27	11.92	43.79	y	0.29	17.36	59.7	y	0.14	7.53	53.74	n	0.11	5.64	51.14	n	0.0198301	-8.59785	down	ENSG00000100241.20	SBF1	protein_coding	SET binding factor 1
novel_IR_9427	chr22	50783045	50783501	-	IntronR	ENST00000395593.7	novel	1.32	7.84	5.93	y	1.37	7.28	5.31	y	2.31	10.35	4.48	y	2.16	6.06	2.8	y	0.0350666	11.2577	up	ENSG00000079974.17	RABL2B	protein_coding	RAB, member of RAS oncogene family-like 2B
novel_IR_9452	chr3	107241087	107285320	+	IntronR	ENST00000495228.1	novel	1.05	0.57	0.55	y	1.08	0.75	0.69	n	0.24	0.58	2.36	n	0.15	0.38	2.52	n	0.0193853	-18.3412	down	ENSG00000243701.5	LINC00883	lincRNA	long intergenic non-protein coding RNA 883
novel_IR_9460	chr3	112141281	112151857	-	IntronR	ENST00000305815.9	novel	0.23	0.13	0.56	n	0.5	0.35	0.71	y	2.33	0.41	0.18	y	2.29	0.22	0.1	n	0.0400463	14.2519	up	ENSG00000172139.14	SLC9C1	protein_coding	solute carrier family 9, subfamily C (Na+-transporting carboxylic acid decarboxylase), member 1
novel_IR_9607	chr3	138476492	138476818	+	IntronR	ENST00000389567.8	novel	0.24	2.01	8.51	y	0.28	2.52	9	y	0.03	0.34	10.19	n	0.04	0.4	10.07	n	0.0444346	-10.9141	down	ENSG00000158220.13	ESYT3	protein_coding	extended synaptotagmin-like protein 3
novel_IR_9761	chr3	197003451	197003901	-	IntronR	ENST00000296350.9	novel	0.82	7.76	9.47	y	0.75	11.12	14.75	y	0.53	6.14	11.68	y	0.43	5.75	13.49	n	0.0470858	-4.99731	down	ENSG00000163975.11	MFI2	protein_coding	antigen p97 (melanoma associated) identified by monoclonal antibodies 133.2 and 96.5
novel_IR_9799	chr3	38120609	38121628	+	IntronR	ENST00000346219.7	novel	0.65	0.45	0.7	y	0.36	0.29	0.8	n	2.36	0.51	0.22	y	2.94	0.56	0.19	y	0.0454315	6.61568	up	ENSG00000008226.19	DLEC1	protein_coding	deleted in lung and esophageal cancer 1
novel_IR_9866	chr3	47245511	47246197	-	IntronR	ENST00000335044.6	novel	0.41	2.04	5	y	0.43	2.72	6.3	y	0.58	3.37	5.84	y	0.54	0.83	1.54	n	0.0491686	6.26099	up	ENSG00000088727.12	KIF9	protein_coding	kinesin family member 9
novel_IR_9915	chr3	49421572	49422361	-	IntronR	ENST00000538581.5	novel	1.09	1.22	1.12	n	1	1.53	1.54	n	0.34	1.63	4.76	y	0.38	0.68	1.77	n	0.0188419	-13.9102	down	ENSG00000145020.14	AMT	protein_coding	aminomethyltransferase
novel_IR_9996	chr3	51971698	51971812	-	IntronR	ENST00000525795.1	novel	0.64	28.29	43.92	y	0.79	39.22	49.76	y	1.19	40.61	33.99	y	1.28	47.17	36.84	y	0.0424287	5.94528	up	ENSG00000114779.19	ABHD14B	protein_coding	abhydrolase domain containing 14B
novel_IR_10099	chr3	9745709	9745812	+	IntronR	ENST00000433861.6	novel	0.27	13.59	51.08	y	0.29	21.28	73.32	y	0.36	25.19	69.91	y	0.34	26.11	76.74	y	0.0384761	4.94975	up	ENSG00000156983.15	BRPF1	protein_coding	bromodomain and PHD finger containing, 1
novel_IR_10135	chr4	102344915	102345345	-	IntronR	ENST00000356736.4	novel	0.09	2.16	23.38	n	0.15	3.91	25.41	n	0.34	7.41	21.81	y	0.38	9.03	24.05	y	0.0306714	6.6564	up	ENSG00000138821.12	SLC39A8	protein_coding	solute carrier family 39 (zinc transporter), member 8
novel_IR_10147	chr4	105967444	105970385	+	IntronR	ENST00000305572.12	novel	0.57	25.16	44.25	y	0.55	26.56	48.45	y	0.69	25.14	36.29	y	0.68	26.12	38.47	y	0.0212375	11.1803	up	ENSG00000168743.12	NPNT	protein_coding	nephronectin
novel_IR_10230	chr4	140373717	140373937	+	IntronR	ENST00000510586.5	novel	0.23	1.86	8.2	n	0.28	3.64	13.22	y	0.02	0.23	9.92	n	0.05	0.5	9.6	n	0.0290071	-7.54594	down	ENSG00000153130.17	SCOC	protein_coding	short coiled-coil protein
novel_IR_10285	chr4	1804520	1804824	+	IntronR	ENST00000340107.8	novel	0.31	5.92	19.26	y	0.34	8	23.58	y	0.22	4.76	22.08	y	0.2	3.17	16.1	n	0.0329611	-6.37905	down	ENSG00000068078.17	FGFR3	protein_coding	fibroblast growth factor receptor 3
novel_IR_10444	chr4	89056988	89057118	-	IntronR	ENST00000515600.1	novel	3.32	6.56	1.97	y	2.92	11.24	3.85	y	4.81	14.99	3.12	y	5.4	12.1	2.24	y	0.0405983	5.5695	up	ENSG00000138640.14	FAM13A	protein_coding	family with sequence similarity 13, member A
novel_IR_10531	chr5	133101460	133104320	+	IntronR	ENST00000617819.4	novel	0.49	59.1	119.47	y	0.46	68.77	148.35	y	0.75	79.13	106.03	y	0.74	73.55	99.59	y	0.0211455	17.0763	up	ENSG00000170606.13	HSPA4	protein_coding	heat shock 70kDa protein 4
novel_IR_10747	chr5	180313964	180316341	-	IntronR	ENST00000253778.12	novel	0.24	10.92	46.43	y	0.23	10.22	45.22	y	0.16	10.47	64.62	n	0.17	8.21	48.82	n	0.0100505	-9.89949	down	ENSG00000131459.12	GFPT2	protein_coding	glutamine-fructose-6-phosphate transaminase 2
novel_IR_10769	chr5	1879832	1880066	-	IntronR	ENST00000613726.4	novel	1.18	0.75	0.63	y	1	1.25	0	n	0.4	0.59	1.47	n	0.21	0.09	0.43	n	0.0268671	-5.99866	down	ENSG00000113430.9	IRX4	protein_coding	iroquois homeobox 4
novel_IR_10839	chr5	56941579	56946992	+	IntronR	ENST00000438553.1	novel	0.48	1.38	2.86	y	0.44	1.41	3.21	y	0.2	1.44	7.05	y	0.27	1.53	5.65	y	0.0497243	-5.58156	down	ENSG00000235635.1	AC016644.1	antisense
novel_IR_11128	chr6	166956191	166957126	-	IntronR	ENST00000476238.6	novel	0.51	2.77	5.42	y	0.46	3.88	8.42	y	0.26	2.56	9.95	y	0.28	2.9	10.51	y	0.0452056	-7.9849	down	ENSG00000026297.15	RNASET2	protein_coding	ribonuclease T2
novel_IR_11188	chr6	28353952	28355323	-	IntronR	ENST00000414429.5	novel	0.65	0.64	1	n	0.12	0.3	2.4	n	4.63	0.5	0.11	n	4.67	1.05	0.23	y	0.0384687	16.0487	up	ENSG00000235109.7	ZSCAN31	protein_coding	zinc finger and SCAN domain containing 31
novel_IR_11305	chr6	36196170	36197075	-	IntronR	ENST00000499560.2	novel	0.18	0.5	2.69	n	0.54	0.25	0.47	y	4.83	1.28	0.26	n	4.6	1.37	0.3	y	0.00495149	20.3886	up	ENSG00000246982.6	RP1-179N16.6	antisense
novel_IR_11310	chr6	37215282	37218426	-	IntronR	ENST00000336655.6	novel	0.17	0.27	1.64	n	0.08	0.14	1.68	n	0.74	1.12	1.52	y	0.62	0.37	0.6	n	0.0217889	7.4	up	ENSG00000172738.11	TMEM217	protein_coding	transmembrane protein 217
novel_IR_11400	chr6	63721797	63726519	-	IntronR	ENST00000503581.5	novel	0.94	2.16	2.31	n	0.91	1.7	1.88	y	0.66	1.78	2.71	y	0.61	1.18	1.93	y	0.0185841	-9.94692	down	ENSG00000188107.13	EYS	protein_coding	eyes shut homolog (Drosophila)
novel_IR_11539	chr7	103271869	103275540	-	IntronR	ENST00000435536.5	novel	1.37	4.11	3	y	1.26	2.94	2.34	n	0.8	3.6	4.48	y	0.86	3.2	3.71	y	0.0320813	-7.74144	down	ENSG00000170629.14	DPY19L2P2	transcribed_unprocessed_pseudogene	DPY19L2 pseudogene 2
novel_IR_11646	chr7	135695487	135699364	-	IntronR	ENST00000354042.8	novel	1	0.3	0	n	0.91	0.87	0.95	n	0.43	0.73	1.67	n	0.26	0.76	2.93	y	0.0450299	-6.34248	down	ENSG00000164707.15	SLC13A4	protein_coding	solute carrier family 13 (sodium/sulfate symporter), member 4
novel_IR_11801	chr7	29655059	29657367	+	IntronR	ENST00000414296.2	novel	0.45	1.42	3.17	y	0.55	0.58	1.05	n	1	0.67	0	n	1.11	0.55	0.49	n	0.0179077	7.46667	up	ENSG00000227855.3	DPY19L2P3	transcribed_unprocessed_pseudogene	DPY19L2 pseudogene 3
novel_IR_11841	chr7	43554790	43561815	+	IntronR	ENST00000395891.6	novel	4.91	6.77	1.38	y	5.23	7.86	1.5	y	2.92	6.37	2.18	y	2.82	5.49	1.95	y	0.0308796	-13.1241	down	ENSG00000002746.14	HECW1	protein_coding	HECT, C2 and WW domain containing E3 ubiquitin protein ligase 1
novel_IR_11872	chr7	4789929	4790459	+	IntronR	ENST00000348624.4	novel	0.18	3.22	17.91	n	0.17	4.86	29.24	n	0.27	7.48	28.11	y	0.25	8.29	33.33	y	0.037184	7.60263	up	ENSG00000242802.6	AP5Z1	protein_coding	adaptor-related protein complex 5, zeta 1 subunit
novel_IR_11970	chr7	74220619	74220704	+	IntronR	ENST00000344995.9	novel	1.32	6.38	4.85	y	1.55	1.79	1.15	y	0.03	0.14	5.1	n	0.06	0.49	7.9	n	0.0490316	-11.9854	down	ENSG00000086730.16	LAT2	protein_coding	linker for activation of T cells family, member 2
novel_IR_12002	chr7	7958618	7969772	-	IntronR	ENST00000428660.1	novel	0.61	1.45	2.39	y	0.63	1.04	1.65	y	0.97	1.05	1.08	y	0.92	1.02	1.11	y	0.0264259	12.0702	up	ENSG00000233108.1	AC006042.7	antisense
novel_IR_12026	chr7	88277169	88283832	+	IntronR	ENST00000434733.3	novel	0.35	2.8	7.98	n	0.38	4.43	11.53	y	0.27	3.13	11.44	n	0.24	2.63	10.94	n	0.0352362	-5.18545	down	ENSG00000228113.7	AC003991.3	antisense
novel_IR_12069	chr7	99664095	99665166	-	IntronR	ENST00000222982.8	novel	0.46	4.05	8.71	y	0.51	4.46	8.71	y	0.27	4.22	15.55	y	0.21	3.4	16.31	y	0.026453	-6.27381	down	ENSG00000106258.13	CYP3A5	protein_coding	cytochrome P450, family 3, subfamily A, polypeptide 5
novel_IR_12071	chr7	99709261	99710732	-	IntronR	ENST00000620220.4	novel	0.62	1.2	1.92	n	0.66	0.54	0.81	n	0.86	1.48	1.72	y	0.91	0.8	0.88	y	0.0189785	7.65251	up	ENSG00000282301.1	CYP3A7-CYP3A51P	protein_coding	CYP3A7-CYP3A51P readthrough
novel_IR_12128	chr8	12423880	12424871	+	IntronR	ENST00000515046.2	novel	1.11	2.13	1.91	y	1	4.15	0	n	0.54	1.61	2.96	y	0.62	1.44	2.33	y	0.025135	-6.98454	down	ENSG00000250794.2	ALG1L12P	unprocessed_pseudogene	asparagine-linked glycosylation 1-like 12, pseudogene
novel_IR_12135	chr8	124568536	124580551	-	IntronR	ENST00000325064.9	novel	0.13	1.93	15.18	n	0.15	2.69	18.08	n	0.22	2.87	13.32	y	0.24	2.75	11.68	y	0.0238129	6.36396	up	ENSG00000170873.18	MTSS1	protein_coding	metastasis suppressor 1
novel_IR_12136	chr8	124568536	124585087	-	IntronR	ENST00000378017.7	novel	0.14	1.45	10.7	n	0.15	2.02	13.19	n	0.22	2.13	9.67	y	0.24	2.04	8.32	y	0.037184	7.60263	up	ENSG00000170873.18	MTSS1	protein_coding	metastasis suppressor 1
novel_IR_12196	chr8	143837755	143838680	-	IntronR	ENST00000442628.6	novel	0.13	2.58	20.62	n	0.08	1.09	13.69	n	0.28	4.34	15.43	y	0.25	5.15	20.55	y	0.0481499	5.48795	up	ENSG00000185189.15	NRBP2	protein_coding	nuclear receptor binding protein 2
novel_IR_12232	chr8	144318751	144318835	-	IntronR	ENST00000528718.5	novel	0	0	13.35	n	0.06	1.81	30.94	n	0.21	3	14.21	y	0.25	3	11.77	y	0.0416957	5.547	up	ENSG00000185000.9	DGAT1	protein_coding	diacylglycerol O-acyltransferase 1
novel_IR_12261	chr8	144510722	144510794	+	IntronR	ENST00000301327.4	novel	0.2	4.56	23.09	n	0.22	4.58	20.91	y	0.03	0.77	23.96	n	0.05	0.56	12.2	n	0.0068494	-12.0208	down	ENSG00000167700.8	MFSD3	protein_coding	major facilitator superfamily domain containing 3
novel_IR_12311	chr8	23459091	23484833	+	IntronR	ENST00000521021.1	novel	0.23	0.87	3.74	y	0.19	1.17	6.1	n	0.39	1.2	3.05	y	0.35	1.08	3.12	y	0.0298575	5.65685	up	ENSG00000253390.1	CTC-756D1.2	lincRNA
novel_IR_12362	chr8	41655753	41661430	-	IntronR	ENST00000289734.11	novel	0.22	0.47	2.11	y	0.25	0.54	2.18	n	0.05	0.17	3.21	n	0.04	0.11	2.67	n	0.0324006	-12.0167	down	ENSG00000029534.19	ANK1	protein_coding	ankyrin 1, erythrocytic
novel_IR_12458	chr9	111718288	111722409	-	IntronR	ENST00000394779.7	novel	0.34	0.77	2.28	y	0.59	1.38	2.35	n	1.43	1.37	0.96	y	1.31	1.14	0.87	n	0.048603	6.52703	up	ENSG00000165181.16	C9orf84	protein_coding	chromosome 9 open reading frame 84
novel_IR_12459	chr9	111728049	111738280	-	IntronR	ENST00000394779.7	novel	0.37	1.25	3.38	y	0.44	1.64	3.75	y	1.23	1.62	1.31	y	1.15	1.68	1.46	y	0.00488842	14.7693	up	ENSG00000165181.16	C9orf84	protein_coding	chromosome 9 open reading frame 84
novel_IR_12696	chr9	137433263	137433453	+	IntronR	ENST00000341349.6	novel	0.99	10.03	10.09	y	0.88	9.88	11.29	y	0.49	3.23	6.54	n	0.59	2.39	4.08	n	0.0342877	-5.31412	down	ENSG00000188747.8	NOXA1	protein_coding	NADPH oxidase activator 1
novel_IR_12713	chr9	137613006	137613460	+	IntronR	ENST00000371421.8	novel	0.24	22.65	93.95	y	0.23	26.1	115.28	y	0.11	12.77	111.95	n	0.13	15.58	119.13	n	0.0239816	-10.2859	down	ENSG00000197070.13	ARRDC1	protein_coding	arrestin domain containing 1
novel_IR_12874	chr9	85786551	85787884	-	IntronR	ENST00000443630.1	novel	0.48	2.94	6.18	n	0.5	3.35	6.76	y	0.22	1.69	7.64	n	0.27	1.43	5.37	n	0.0381672	-9.09907	down	ENSG00000230303.5	RP11-213G2.2	lincRNA
novel_IR_12984	chrX	108670236	108674745	+	IntronR	ENST00000328300.10	novel	1.59	8.64	5.44	y	1.73	11.24	6.5	y	0.94	7.91	8.44	y	0.9	7.36	8.17	y	0.0445445	-10.1647	down	ENSG00000188153.12	COL4A5	protein_coding	collagen, type IV, alpha 5
novel_IR_13122	chrX	18239953	18241013	-	IntronR	ENST00000398048.4	novel	0.93	10.92	11.72	y	0.97	15.49	16.01	y	0.73	10.94	14.94	y	0.74	10.96	14.75	y	0.0467493	-10.429	down	ENSG00000102098.17	SCML2	protein_coding	sex comb on midleg-like 2 (Drosophila)
novel_IR_13225	chrX	55143875	55146181	-	IntronR	ENST00000332132.8	novel	0.26	2.34	9.14	y	0.3	3.5	11.58	y	0.16	2.78	17.59	n	0.13	1.95	15.59	n	0.0383286	-5.4	down	ENSG00000182518.13	FAM104B	protein_coding	family with sequence similarity 104, member B
Ass, alternative splicing site; Chr, chromosome; ENST, prefix of transcript ID, ensembl transcript; KorN, known or novel; Mss, model splicing site; NIR, non-IR.
